# Supplementary material for: The multiclass ARKA framework for developing improved q-RASAR models for environmental toxicity endpoints
Source: Royal Society of Chemistry journal article supplement (doi:10.1039/d5em00068h), 2025-01-01
Supplement: d5em00068h1.zip [file d5em00068h1.zip]

## Sheet: Sheet1
				The multiclass ARKA framework for
					developing improved q-RASAR
			models for environmental toxicity endpoints
							Arkaprava Banerjee*, Kunal Roy*
							Drug Theoretics and Cheminformatics Laboratory, Department of Pharmaceutical Technology, Jadavpur University, Kolkata 700 032, India
						Supplementary Materials SI-6
					Correspondence to:			Arkaprava Banerjee (arka.banerjee16@gmail.com)
								Kunal Roy (kunal.roy@jadavpuruniversity.in)

## Sheet: TRAIN
No.	LOGPcons	SAdon	D/Dtr03	nHM	minddssS	F06[O-O]	Cl-089	MaxsssN	Log(1/LC50)
2	6.14407	0	62.5186	1	0	0	1	0	9.21126
4	5.08381	0	60.7616	0	0	0	0	0	9.04313
610	5.16544	0	60.7616	2	0	0	0	0	9.02836
5	5.40439	0	63.5616	2	0	0	0	0	8.9657
611	5.16544	0	60.7616	2	0	0	0	0	8.78058
8	6.1489	36.0215	0	1	0	0	0	0	8.73996
612	4.96155	0	48.6687	2	0	0	0	0	8.72447
613	4.11259	0	16.9941	6	0	0	2	0	8.71749
7	4.82642	0	0	2	0	0	1	1.42809	8.71717
12	4.0703	0	59.7869	0	0	0	0	0	8.50672
14	4.17683	0	0	5	0	0	2	0	8.43087
13	4.11328	0	0	4	0	0	2	0	8.40163
614	4.58664	0	46.6373	0	0	0	0	0	8.208
19	4.54562	0	55.395	0	0	0	0	0	8.18167
23	5.16544	0	60.7616	2	0	0	0	0	8.17227
22	5.29545	0	55.3807	0	0	0	0	0	8.11331
615	3.29834	0	0	4	0	0	2	0	8.10618
18	3.10993	0	0	3	0	0	0	0	8.05505
25	3.96459	0	0	6	0	0	0	0	8.00123
28	2.39455	0	0	4	0	0	0	0	7.95083
33	5.6765	0	88.3759	0	0	0	0	0	7.94825
21	3.08447	0	0	2	0	0	1	0	7.93618
616	4.87448	0	0	0	0	0	0	0	7.90656
26	3.00213	42.6833	0	0	0	6	0	0	7.84917
34	5.03431	0	0	2	0	0	1	0	7.76517
618	4.86761	0	0	7	0	0	2	0	7.72696
32	2.98395	0	0	3	0	0	0	0	7.71847
38	5.25569	0	0	5	0	0	2	0	7.57358
29	2.19446	0	0	3	0	0	0	0	7.53458
37	4.22627	17.8882	0	0	0	1	0	0.892573	7.53197
35	3.74458	13.3401	0	2	0	0	0	0	7.51353
42	5.37708	0	55.3807	2	0	0	0	0	7.49561
39	1.45301	0	0	1	0	0	0	0	7.48591
619	1.4574	0	0	4	0	2	0	1.27109	7.48054
620	4.49678	0	0	1	0	4	0	1.25339	7.47194
45	4.22962	0	0	0	0	3	0	0	7.40698
40	3.77569	0	47.3157	0	0	1	0	0	7.39856
44	4.28113	0	0	0	0	10	0	0	7.36754
46	5.00454	0	0	0	0	1	0	0	7.3647
622	3.32386	0	47.2164	0	0	2	0	1.08252	7.3163
621	4.39525	0	0	2	0	0	2	0	7.30558
43	2.66108	0	0	4	0	0	0	0	7.30173
50	4.01747	0	17.9934	7	0	0	2	0	7.28925
41	0.751307	0	0	1	0	6	0	0	7.2714
49	1.50255	0	0	3	0	4	0	0	7.26377
48	5.52179	0	0	4	0	0	0	0	7.2446
623	2.39372	0	0	3	0	2	0	1.25604	7.20052
53	3.96374	18.0108	0	1	0	0	1	0	7.16189
57	3.47812	0	0	1	0	4	0	1.24201	7.10554
54	2.35602	0	0	2	0	2	0	0	7.08566
59	5.68969	0	0	2	0	1	2	0	7.07014
60	3.49606	0	0	1	0	0	0	1.93771	7.03362
77	8.02305	42.6833	0	2	0	0	0	0	7.02443
625	4.54669	0	0	2	0	0	0	0	7.01781
67	4.65892	0	0	0	0	0	0	0	7.01205
78	7.45595	42.6833	0	1	0	0	0	0	7.0113
58	5.99056	0	0	4	0	0	2	0	6.9973
627	5.60437	0	0	2	0	0	0	0	6.99266
56	5.54339	0	0	6	0	0	6	0	6.97736
62	2.22317	0	50.2211	0	0	2	0	1.2393	6.9232
71	3.21096	18.0108	0	0	0	2	0	0	6.8763
64	3.39827	34.7963	0	1	0	0	0	0	6.87416
631	6.76939	42.6833	0	0	0	0	0	0	6.84174
75	4.49041	0	0	0	0	8	0	0	6.80936
94	7.53513	42.6833	0	0	0	0	0	0	6.77542
81	3.76194	0	0	5	0	0	1	0	6.7499
73	1.89016	0	0	4	0	0	0	1.89412	6.71832
90	4.76092	0	0	5	0	0	2	0	6.70273
74	2.68513	35.7765	0	0	0	0	0	0	6.70126
87	3.52562	0	0	0	0	3	0	0	6.69002
88	4.23728	42.6833	0	5	0	0	2	0	6.67143
632	5.86953	0	0	4	0	0	2	0	6.66011
634	5.31182	0	0	8	0	0	2	0	6.65829
83	4.01922	32.8972	0	0	0	0	0	0	6.62713
86	2.00732	0	0	2	0	0	0	0	6.62669
91	4.60078	0	0	0	0	4	0	1.36103	6.61697
635	4.11459	0	0	2	0	0	2	0	6.61616
93	3.32789	0	0	6	0	0	0	0	6.57696
84	3.25202	0	0	1	0	0	0	1.83316	6.51624
99	3.8187	0	0	2	0	2	0	0	6.46825
109	6.31899	35.899	0	0	0	0	0	0	6.46374
96	3.94139	18.0108	0	3	0	0	1	0	6.46245
101	1.81684	0	0	3	0	6	1	1.22323	6.45078
105	4.40749	0	0	0	0	4	0	1.24876	6.3893
103	3.51945	36.0215	0	1	0	0	1	0	6.3784
68	1.28604	32.8972	0	0	0	0	0	0	6.35635
122	5.9798	35.899	0	0	0	0	0	0	6.3428
108	4.029	18.0108	0	3	0	0	2	0	6.32307
637	4.16226	18.0108	0	0	0	4	0	0	6.30937
638	2.39967	36.0215	0	0	0	2	0	0	6.23249
104	1.87184	18.0108	0	1	0	0	0	0	6.22523
118	4.71208	0	0	5	0	0	3	0	6.22221
115	3.36207	0	0	0	0	3	0	0	6.21732
119	4.65302	0	0	2	0	2	2	1.07141	6.2108
639	2.91893	0	0	4	0	0	0	0.99537	6.20848
121	4.39331	32.8972	0	2	0	0	2	0	6.20706
110	4.48418	42.6833	0	5	0	0	5	0	6.19495
52	-1.01	78.0726	0	0	0	0	0	0	6.18931
126	5.10847	0	0	1	0	2	1	0	6.16043
131	5.21074	0	0	1	0	0	1	1.23312	6.15718
644	5.89555	0	0	0	0	0	0	0	6.14951
641	1.82209	0	0	3	0	4	0	1.16113	6.13981
80	0.962964	0	0	1	0	0	0	0	6.139
113	4.17616	42.6833	0	2	0	0	2	0	6.13025
116	5.01044	0	0	5	0	0	5	0	6.11974
128	5.38462	0	0	2	0	0	2	0	6.1118
124	3.42704	0	0	4	0	0	0	0.858796	6.0919
111	2.705	0	0	1	0	0	0	1.70139	6.07047
100	2.98806	0	0	0	0	0	0	0	6.06643
127	4.96009	0	0	2	0	0	2	0	6.05738
97	1.09538	85.3667	0	0	0	0	0	0	6.05509
132	4.46236	0	0	2	0	0	2	0	6.04165
140	4.53758	18.0108	0	3	0	0	3	0	6.02756
123	2.64692	16.7855	0	0	0	0	0	0	6.02745
150	4.68741	0	0	1	0	1	1	0	6.02319
134	3.3605	0	0	2	0	0	0	0	6.01977
120	2.31616	0	0	0	0	0	0	0	6.01007
114	1.32055	34.7963	0	0	0	0	0	0	6.00276
159	6.12713	0	0	4	0	0	2	0	5.99223
135	3.73427	0	0	1	0	0	0	1.79796	5.96648
136	3.19522	0	0	0	0	0	0	0	5.93887
154	3.64835	0	0	0	0	0	0	0	5.93366
647	4.53043	0	0	5	0	0	4	0	5.92997
152	4.61038	0	0	1	0	0	1	0	5.92062
643	3.26041	0	0	2	0	0	1	0	5.91162
172	4.23267	0	0	1	0	2	1	0.775075	5.90961
141	4.31506	18.0108	0	0	0	4	0	0	5.90218
147	3.4934	0	0	5	0	0	2	0	5.8958
649	2.66357	0	0	2	0	0	0	0	5.89094
146	2.43879	0	0	2	0	0	0	2.03072	5.87846
153	4.33836	42.6833	0	2	0	0	2	0	5.87728
130	5.15766	42.6833	0	0	0	0	0	0	5.86607
148	2.26305	0	0	1	0	0	0	1.41225	5.8641
149	4.71249	0	0	3	0	0	0	0	5.85845
648	2.36704	18.0108	0	3	0	1	1	0	5.84995
142	4.37076	0	0	4	0	0	4	0	5.84824
133	2.83382	18.0108	0	0	0	0	0	0	5.82524
177	5.59649	0	0	4	0	0	3	0	5.78857
169	4.10259	0	0	1	0	0	1	0	5.78293
161	2.91893	0	0	4	0	0	0	0.99537	5.77902
145	0.918693	0	0	2	0	4	0	0	5.77859
167	4.47665	0	0	0	0	2	0	0	5.76798
171	3.43458	0	0	4	0	4	1	1.49546	5.76632
187	3.24138	0	0	4	-3.46352	0	0	1.84824	5.75434
188	5.05916	0	0	2	0	0	2	0	5.75286
125	1.1414	0	0	2	0	0	0	0	5.73443
160	4.95414	0	0	0	0	0	0	0	5.72668
176	4.39686	0	0	2	0	2	2	0	5.70813
189	4.38742	0	0	2	0	0	2	0	5.70798
144	1.75163	42.6833	0	2	0	0	0	0	5.69079
650	2.8935	42.6833	0	2	0	0	2	0	5.67223
174	3.17642	18.0108	0	0	0	0	0	0	5.65956
143	2.01803	0	0	0	0	4	0	0	5.65742
197	1.28725	18.0108	0	0	0	3	0	0	5.64332
179	3.79187	0	0	4	0	0	2	0	5.63992
184	4.0556	0	0	5	0	0	3	0	5.63802
193	3.98571	32.8972	0	0	0	4	0	1.32617	5.62594
183	3.6113	17.8882	0	1	0	0	0	1.53472	5.62414
657	4.69628	0	0	0	0	0	0	0	5.61129
651	1.46678	0	0	3	0	0	0	0	5.60399
656	5.06144	0	0	0	0	0	0	1.85972	5.5983
654	3.44568	32.8972	0	1	0	2	1	0	5.59665
664	4.41547	0	0	1	0	2	1	0.830931	5.58587
658	4.69518	0	0	0	0	4	0	1.75037	5.58582
207	4.46352	0	0	2	0	2	2	0	5.56744
180	1.13431	42.6833	0	4	0	0	0	0	5.56558
165	1.96167	16.7855	0	1	0	0	0	0	5.56342
158	3.99046	0	0	0	0	0	0	0	5.56081
215	4.36387	0	0	1	0	1	1	0	5.55815
208	2.94673	16.405	0	4	-3.49076	0	0	0	5.55802
106	1.44597	0	0	0	0	0	0	0	5.55711
107	0.32694	0	0	0	0	0	0	0	5.54461
191	3.14808	0	0	3	0	0	0	0	5.54152
173	2.74304	18.0108	0	1	0	0	0	0	5.53992
206	6.24298	0	0	2	0	0	0	0	5.5372
218	4.6543	16.405	0	3	-4.43141	0	2	0	5.52834
196	2.01918	0	0	2	0	0	0	0	5.52471
199	3.15806	18.0108	0	0	0	1	0	0	5.51842
671	6.7074	0	0	6	0	0	0	0	5.50917
200	3.93848	0	0	4	0	0	1	1.78866	5.50159
213	4.0805	0	0	1	0	0	0	0	5.49565
182	3.25671	18.0108	0	0	0	0	0	0	5.47966
237	5.4892	0	69.6228	2	0	0	0	0	5.47927
666	4.38179	0	54.5202	0	0	0	0	0	5.47758
194	3.78647	0	0	1	0	0	0	1.95199	5.47614
190	3.23003	16.7855	0	2	0	0	2	0	5.47182
222	3.64857	0	0	2	0	0	2	1.3436	5.46954
201	2.04263	0	0	0	0	2	0	1.44444	5.45941
217	4.78362	0	0	2	0	2	2	1.11749	5.45895
668	4.73311	0	0	0	0	0	0	0	5.43443
225	3.25079	0	0	1	0	2	1	0	5.40493
228	4.12731	0	0	3	0	0	3	1.67997	5.39989
214	2.96001	42.6833	0	1	0	0	1	0	5.36699
219	3.25545	0	0	1	0	0	0	1.76852	5.36315
223	4.20025	60.6941	0	2	0	0	2	0	5.35322
665	2.76375	85.3667	0	1	0	0	1	0	5.35165
227	4.23879	0	0	1	0	0	1	0	5.35135
669	4.02828	42.6833	0	1	0	0	1	0	5.34753
238	3.66872	0	0	3	0	0	2	0	5.34598
232	4.21888	0	0	1	0	0	0	0	5.34348
209	2.6923	36.0215	0	1	0	0	0	0	5.34136
186	-0.0458196	0	0	1	0	0	0	0	5.33963
667	3.61702	0	0	1	0	0	0	1.64005	5.33911
220	2.6445	0	0	2	0	2	0	0	5.32894
239	3.04068	0	39.2475	1	-4.04167	0	0	0	5.32507
233	3.98394	42.6833	0	2	0	0	2	0	5.31489
234	3.98394	42.6833	0	2	0	0	2	0	5.31489
660	2.27472	16.7855	0	0	0	0	0	0	5.30627
226	3.54104	0	0	2	0	0	2	0	5.30279
204	2.49735	18.0108	0	0	0	0	0	0	5.29494
221	3.16676	42.6833	0	3	0	0	3	0	5.29341
212	2.93357	0	0	3	0	0	1	2.12483	5.28544
673	4.43059	18.0108	0	0	0	0	0	0	5.28116
255	2.37449	0	0	1	-4.36506	0	0	0	5.25015
240	3.09692	36.0215	0	0	0	2	0	0	5.24462
250	3.12526	32.8972	0	2	0	0	2	0	5.23484
242	3.39631	0	0	1	0	0	0	1.44708	5.23386
257	4.10779	18.0108	0	1	0	1	0	0	5.19971
252	4.03995	42.6833	0	0	0	0	0	0	5.19781
259	2.58037	0	0	0	0	0	0	1.27791	5.18772
268	3.58027	0	0	1	0	1	1	0.451845	5.1801
248	3.66336	0	0	1	0	0	1	0	5.15958
276	4.21343	18.0108	0	1	0	0	1	0	5.1524
253	3.31612	0	0	1	0	0	0	1.7156	5.12863
273	3.45709	0	0	4	0	0	1	1.71659	5.11856
265	3.51068	0	0	2	0	0	2	0	5.11823
235	0.148026	18.0108	0	1	0	0	0	0	5.11038
680	5.22585	0	0	0	0	0	0	0	5.10848
267	4.57709	18.0108	0	2	0	0	1	0	5.10421
210	1.31249	0	0	1	0	0	0	0	5.10289
224	3.06343	0	0	2	0	0	2	0	5.10192
272	4.0114	0	0	0	0	0	0	0	5.08482
681	2.37919	31.2914	0	1	-4.3093	12	0	1.51705	5.08322
247	2.23363	18.0108	0	0	0	0	0	1.4894	5.0688
285	3.26277	0	0	1	0	0	1	1.79184	5.05723
689	3.63089	103.377	0	0	0	1	0	0	5.02677
683	3.85582	0	40.627	1	0	0	1	0	5.02129
675	2.60037	36.0215	0	1	0	0	0	0	5.01883
678	2.7636	0	0	2	0	0	2	0.851728	5.01882
682	3.51318	0	0	2	0	0	0	1.24995	5.01721
677	2.50091	0	0	4	0	0	0	0	5.01343
287	4.42109	0	0	1	0	0	1	1.71446	5.01242
229	3.52599	0	0	0	0	0	0	0	5.01205
258	1.84694	18.0108	0	1	0	0	0	0	5.00995
275	3.19452	0	0	2	0	0	2	0.888333	5.00323
274	5.12849	0	0	0	0	0	0	2.58689	5.00086
280	3.05155	0	0	2	0	0	0	0	4.99207
256	2.04077	36.0215	0	1	0	0	0	0	4.98667
236	1.3688	16.405	0	1	0	0	0	0	4.97543
262	3.29707	18.0108	28.5676	0	0	0	0	0	4.97078
662	0.566587	42.6833	0	1	0	0	1	0	4.97065
684	3.8465	42.6833	0	2	0	0	2	0	4.96578
685	3.71063	42.6833	0	1	0	0	1	0	4.94592
687	4.29936	17.8882	0	0	0	0	0	1.39133	4.94321
260	2.3057	42.6833	0	0	0	0	0	0	4.92743
679	1.17717	18.0108	0	0	0	2	0	0	4.91743
298	3.84851	13.3401	0	2	0	2	0	0	4.90888
297	3.8382	42.6833	0	2	0	0	2	0	4.90732
283	2.66512	18.0108	0	2	0	0	2	1.05805	4.89808
295	4.66058	42.6833	0	0	0	1	0	0	4.88721
294	3.25545	0	0	1	0	0	0	1.76852	4.86199
296	3.31421	0	0	1	0	0	1	0	4.85736
289	3.11058	42.6833	0	2	0	0	2	0	4.85231
306	3.90676	0	0	4	0	0	4	0	4.84899
282	-0.0478926	18.0108	0	1	0	1	0	1.34975	4.84549
291	2.07081	0	0	4	0	0	0	0	4.82342
308	3.73708	0	0	0	0	0	0	1.55903	4.82227
277	3.42938	42.6833	0	1	0	0	0	0	4.81725
292	2.59489	0	0	1	0	0	0	1.6956	4.81678
311	3.21483	32.8972	0	1	0	0	0	1.41223	4.80445
284	2.95769	0	0	2	0	0	2	0	4.79758
266	2.77302	42.6833	0	2	0	0	2	0	4.79223
317	3.67293	0	0	4	0	2	1	1.63451	4.78757
688	2.048	18.0108	0	1	0	0	0	1.82568	4.77773
316	3.21836	0	0	3	0	0	0	1.98196	4.77029
309	2.77673	18.0108	0	2	0	0	1	1.07931	4.76873
661	1.32892	0	5.33333	0	0	0	0	0	4.74822
335	2.07362	50.8207	53.0543	1	-4.32897	4	0	0	4.73829
307	3.69423	18.0108	0	2	0	0	2	0	4.73638
301	2.84685	42.6833	0	1	0	0	1	0	4.72578
299	3.18438	0	0	1	0	0	0	1.97569	4.71405
300	1.5975	18.0108	0	0	0	0	0	1.82568	4.71149
330	6.33088	0	0	5	0	0	2	0	4.70449
321	3.54544	18.0108	0	1	0	0	0	0	4.70321
315	1.6601	0	0	2	0	3	1	1.51362	4.69856
341	1.98129	34.4157	0	2	-4.38207	1	0	0	4.69362
304	3.00841	0	0	1	0	0	0	2.06282	4.68003
696	3.61842	18.0108	0	0	0	0	0	0	4.67778
290	2.57216	32.8972	0	2	0	0	2	0	4.6655
692	3.69241	0	0	1	0	0	0	1.99887	4.66481
310	2.3928	36.0215	0	1	0	0	0	0	4.65778
318	1.85613	0	0	2	0	1	0	1.5187	4.65189
340	3.55653	42.6833	0	0	0	0	0	0	4.64898
693	2.45608	0	0	2	0	0	0	1.74769	4.6413
326	2.45582	0	0	2	0	0	0	0	4.63055
686	3.08906	42.6833	0	0	0	0	0	0	4.62895
695	3.76164	0	0	0	0	0	0	0	4.6189
328	4.62349	0	0	2	0	2	2	0	4.60837
312	3.12119	18.0108	0	2	0	0	2	0	4.60624
320	4.89347	0	0	0	0	0	0	0	4.60285
271	1.85877	0	0	2	0	0	1	0	4.60116
332	3.25778	0	26.5472	2	0	0	2	1.20958	4.59501
339	2.54277	18.0108	0	1	0	0	1	0.81787	4.57395
324	1.74636	18.0108	0	1	0	1	0	0	4.56309
347	2.33316	78.7048	0	1	0	0	0	0	4.56227
322	3.25495	0	0	4	0	0	0	0	4.55051
338	2.2002	36.0215	0	1	0	0	0	0	4.53058
313	1.37604	0	0	0	0	0	0	0	4.51945
697	1.22377	0	0	0	0	0	0	0	4.51472
700	2.83668	0	0	1	0	0	0	1.6713	4.51428
329	0.257874	18.0108	0	1	0	3	0	0	4.50358
279	0.64404	0	0	0	0	0	0	0	4.49696
314	1.50027	0	0	3	0	0	0	2.08796	4.4904
358	6.34876	0	0	5	0	0	4	0	4.46922
699	3.01497	36.0215	0	0	0	0	0	0	4.45768
344	1.8698	75.5805	0	3	0	0	2	0	4.43836
351	3.80069	18.0108	0	0	0	1	0	0	4.43035
355	2.56257	60.6941	34.5361	2	0	0	2	0	4.39653
293	1.03896	0	0	1	0	0	0	0	4.38638
408	3.80248	18.0108	0	0	0	4	0	0	4.37903
345	-0.0660075	18.0108	0	2	0	0	0	0	4.36979
323	2.42542	42.6833	0	0	0	0	0	0	4.36877
702	2.20311	75.5805	0	2	0	0	2	0	4.31393
703	1.51827	0	0	0	0	0	0	1.38194	4.29552
707	3.37426	42.6833	0	1	0	0	1	0	4.29484
354	2.67635	18.0108	0	0	0	0	0	0	4.2758
362	2.20345	36.0215	0	0	0	0	0	0	4.27366
701	1.91154	18.0108	0	1	0	0	1	0	4.26462
368	3.51578	42.6833	0	3	0	0	3	0	4.26031
705	3.26458	0	0	1	0	0	0	2.03171	4.25997
714	4.03016	42.6833	0	1	0	2	1	0	4.2422
370	-4.5425	0	0	2	0	0	0	0	4.23415
381	3.22661	42.6833	0	0	0	1	0	0	4.23215
394	2.77016	0	0	0	0	3	0	0	4.23164
244	-0.4578	0	0	0	0	0	0	0	4.21274
367	2.14648	36.0215	0	0	0	0	0	0	4.20671
366	2.22228	18.0108	0	0	0	0	0	2.04994	4.20396
397	3.19804	0	0	1	-3.8093	12	0	1.55786	4.19592
371	2.60125	0	0	1	0	0	1	1.39009	4.18937
374	0.720518	0	0	3	0	3	0	0	4.16105
402	2.93227	20.6251	0	2	0	0	1	0	4.15831
389	1.71917	18.0108	0	3	0	0	0	0	4.15444
398	3.12825	36.0215	0	0	0	0	0	0	4.14978
708	1.86206	18.0108	0	1	0	0	0	1.50463	4.1436
713	3.19002	42.6833	0	1	0	0	1	0	4.14262
399	4.02328	42.6833	0	2	0	0	2	0	4.13783
386	0.753607	18.0108	0	1	-3.54948	0	0	0	4.12819
706	1.74192	0	0	0	0	0	0	1.95255	4.12468
413	4.96186	0	0	0	0	0	0	1.46282	4.10671
379	2.25271	36.0215	0	0	0	0	0	0	4.09757
377	3.24667	18.0108	0	0	0	0	0	0	4.08187
395	2.81074	0	0	2	0	0	2	0	4.07835
373	2.27269	0	0	1	0	0	0	2.00116	4.06851
385	1.27114	36.0215	0	1	0	0	0	0	4.06422
710	1.80893	50.9079	0	1	0	0	0	0	4.04941
400	2.12684	0	0	2	0	0	0	2.06826	4.01353
718	4.03539	0	0	2	0	1	2	1.67699	4.01067
383	1.2802	0	0	0	0	0	0	0	3.99141
405	2.39909	0	0	1	0	0	0	1.49306	3.98748
704	1.61909	0	0	0	0	0	0	0	3.97662
393	3.47149	0	0	0	0	0	0	1.67766	3.9754
412	2.9014	0	0	0	0	2	0	1.42593	3.96722
372	2.58786	0	0	0	0	0	0	0	3.9199
407	2.47098	18.0108	0	0	0	0	0	1.23637	3.8888
717	0.26438	18.0108	0	3	0	0	0	0	3.88038
390	2.33415	0	0	0	0	0	0	0	3.86929
415	0.701418	42.6833	36.4396	0	0	0	0	0	3.85783
378	2.29722	18.0108	0	0	0	0	0	0	3.85626
432	4.94994	18.0108	0	2	0	0	2	0	3.84281
724	0.918596	34.4157	0	2	-4.30274	1	0	0	3.83693
719	0.168086	0	0	3	0	0	0	0.956343	3.82724
403	-1.84694	112.712	0	1	0	4	0	0	3.82667
434	4.53894	42.6833	0	1	0	2	1	0	3.82592
404	1.05276	18.0108	0	1	0	0	0	0	3.81704
416	0.0519523	18.0108	0	1	-3.26804	0	0	0	3.79916
440	0.394217	34.4157	0	1	-4.45888	2	0	1.18697	3.79571
414	1.62257	16.405	0	1	-3.38077	0	0	1.1318	3.78699
429	4.13068	42.6833	0	0	0	0	0	0	3.78466
425	2.15277	18.0108	0	1	0	0	0	1.11314	3.78003
410	2.27053	36.0215	0	0	0	0	0	0	3.77881
523	4.14544	36.0215	0	0	0	0	0	0	3.761
715	-0.103239	28.2265	0	2	0	0	0	0	3.75174
712	1.55002	32.8972	0	0	0	0	0	0	3.74698
423	1.34311	32.8972	0	1	0	0	1	1.20704	3.72974
442	-3.979	0	0	2	0	0	0	0	3.71056
420	1.82365	75.5805	0	2	0	0	2	0	3.7034
733	0.412469	50.8207	0	2	-4.63119	2	0	0	3.70206
422	-5.00901	0	0	2	0	4	0	0	3.70162
460	2.59181	16.405	0	2	-4.39754	6	1	0	3.69882
462	2.21836	16.405	0	1	-4.84846	0	0	0	3.69837
522	5.41737	36.0215	78.1832	1	0	0	1	0	3.68478
427	2.10951	18.0108	0	0	0	0	0	0	3.67903
428	1.48862	18.0108	0	1	0	0	1	1.11343	3.6712
490	-1.0936	85.3667	0	1	0	0	0	0	3.66511
450	3.76056	42.6833	0	1	0	0	1	0	3.66487
732	0.38532	52.4265	0	1	-4.54451	2	0	1.1643	3.65562
453	4.47301	0	0	1	0	0	1	0	3.64534
509	2.35624	0	0	2	-3.90159	1	1	0	3.64429
720	1.5369	60.6941	0	0	0	2	0	0	3.63493
530	1.50313	34.4157	0	1	-4.69288	3	0	0	3.62804
426	2.00906	32.8972	0	0	0	0	0	0	3.62428
521	0.964802	34.4157	0	1	-4.24031	3	0	0	3.61643
430	2.27728	42.6833	0	1	0	0	1	0	3.60343
510	2.99463	36.0215	0	1	0	2	1	0	3.6009
433	-0.174584	0	0	2	-3.28123	0	0	0	3.60021
536	5.29578	32.8972	0	1	0	1	1	0	3.60003
458	3.33786	0	0	1	0	0	0	0	3.59446
418	0.868842	18.0108	0	0	0	0	0	0	3.58795
531	0.753336	16.405	0	2	-4.44759	2	0	0.91857	3.57452
744	4.59312	17.8882	0	0	0	1	0	1.4295	3.57081
538	3.31225	16.405	0	3	-4.23246	2	2	0	3.5674
437	2.72937	0	0	1	0	0	0	0	3.56559
494	1.67396	42.6833	0	1	-3.51808	2	0	0	3.56042
484	2.11924	16.405	0	1	-4.58498	2	0	0	3.55548
527	7.08122	0	0	2	0	0	1	0	3.54019
419	-0.3288	173.759	0	1	-4.66667	0	0	0	3.53907
507	3.59187	42.6833	0	1	0	0	1	0	3.53753
438	2.11588	36.0215	0	0	0	0	0	0	3.53693
539	1.06744	34.4157	0	1	-4.35649	1	0	0	3.52831
435	2.5449	42.6833	0	0	0	0	0	0	3.52184
511	2.20042	85.3667	0	0	0	4	0	0	3.5217
454	3.86117	0	0	0	0	0	0	0	3.51601
558	1.33122	52.4265	0	1	-4.38234	1	0	0	3.5129
526	0.757746	0	0	2	0	0	0	0	3.50092
533	2.13629	78.5823	0	0	0	0	0	0	3.49884
469	2.2355	0	0	2	0	0	0	1.94583	3.49489
545	0.711782	77.0991	0	2	-4.37265	1	0	0	3.493
524	2.46795	34.4157	0	1	-5.49407	0	0	0	3.49182
534	2.93005	75.5805	0	2	0	0	2	0	3.49063
727	1.53125	17.8882	0	1	0	0	0	1.78543	3.48864
473	1.09751	60.6941	0	0	0	2	0	0	3.48526
474	3.50203	85.3667	0	4	0	0	4	0	3.48273
513	1.16891	85.3667	0	0	0	4	0	0.949028	3.47029
543	1.12468	128.05	0	0	0	7	0	0	3.46041
451	1.2961	32.7747	0	1	0	0	0	1.03993	3.45834
515	3.52264	42.6833	0	0	0	0	0	0	3.45212
528	1.54659	60.6941	0	0	0	0	0	0	3.43987
446	2.57514	0	0	0	0	0	0	1.82815	3.42863
512	1.84412	42.6833	0	0	0	2	0	1.28819	3.4238
547	2.66115	118.264	0	2	0	0	2	0	3.42203
728	1.42874	18.0108	0	1	0	0	0	1.4513	3.4191
751	3.46228	42.6833	0	0	0	0	0	0	3.41429
568	3.59075	16.405	0	2	-4.00178	2	1	0	3.41181
447	2.83208	18.0108	0	0	0	0	0	0	3.41066
516	1.88807	42.6833	36.7262	0	0	1	0	0	3.4088
461	2.71884	42.6833	0	1	0	0	1	0	3.40715
472	1.024	118.264	0	2	0	0	1	0	3.40373
549	1.09751	60.6941	0	0	0	2	0	0	3.39847
540	2.3377	0	0	3	0	0	0	1.41468	3.39548
730	3.0085	0	0	0	0	0	0	1.64352	3.39224
565	0.866449	77.0991	0	1	-4.4264	1	0	0	3.38902
742	2.98257	42.6833	0	2	0	0	2	0	3.38392
725	1.56704	50.9079	0	1	0	0	1	0	3.37467
480	1.48941	36.0215	0	0	0	0	0	0	3.37346
726	0.84982	0	0	0	0	0	0	0	3.37104
556	1.68313	0	0	2	0	2	0	1.64895	3.3681
483	0.889763	18.0108	0	0	0	0	0	0	3.36018
444	2.02597	42.6833	0	0	0	0	0	0	3.36011
471	-3.0928	21.1351	0	1	0	0	0	0	3.35999
464	2.27728	42.6833	0	1	0	0	1	0	3.35301
542	2.60457	42.6833	0	3	0	0	2	0	3.34085
750	2.02232	36.0215	0	0	0	1	0	1.41651	3.31586
548	1.15927	50.7854	0	0	0	0	0	0.895741	3.30345
498	1.25196	16.405	0	1	-3.36792	0	0	1.125	3.30166
574	4.21728	0	0	2	0	0	2	1.16858	3.29476
470	1.82161	18.0108	0	0	0	0	0	0	3.29097
729	2.04374	42.6833	0	0	0	0	0	0	3.28732
500	1.41963	42.6833	0	0	0	0	0	0	3.28131
552	1.14738	39.0961	0	4	-4.12708	0	1	0	3.26675
537	0.0659341	13.3401	0	2	0	0	0	0	3.22151
481	0.381367	83.8051	21.1111	0	0	0	0	0	3.22068
502	1.1686	85.3667	0	0	0	0	0	0	3.22047
503	0.632765	75.5805	0	0	0	0	0	0	3.2179
546	0.509927	0	0	1	-3.5497	0	0	0.761574	3.21579
468	0.708986	32.8972	0	0	0	0	0	0	3.20406
508	-0.243359	32.8972	0	1	0	0	1	1.1237	3.20301
555	2.81226	42.6833	0	3	0	0	2	0	3.2007
748	1.11877	31.2914	0	2	-3.66544	0	1	0	3.18909
445	0.608238	42.6833	0	1	0	0	1	0	3.18541
496	1.29107	18.0108	0	0	0	0	0	0	3.18247
576	2.56324	20.6251	0	1	0	0	0	0	3.17015
554	0.216052	16.405	0	1	-3.55433	0	0	0	3.1695
563	2.02139	0	0	2	0	0	0	1.46296	3.16905
740	1.31654	42.6833	0	0	0	0	0	0	3.16773
745	0.652867	18.0108	0	1	0	0	0	0	3.16332
738	-0.551964	50.7854	0	1	0	0	1	0	3.16304
452	0.894511	75.5805	0	0	0	0	0	0	3.16292
577	1.6245	0	0	2	-3.4438	0	1	0	3.16089
541	0.0573448	31.2914	0	2	-3.44097	0	0	0	3.15213
562	0.102474	50.6629	0	0	0	0	0	0.521412	3.13826
721	-0.175079	42.6833	0	0	0	0	0	0	3.12537
561	1.8351	0	0	0	0	0	0	0	3.11712
752	-0.036881	18.0108	0	1	-3.19918	0	0	0	3.11649
431	-2.06059	0	0	0	0	0	0	0	3.0923
505	0.560631	32.8972	0	0	0	0	0	0	3.09054
567	2.51744	42.6833	0	0	0	0	0	0	3.07493
755	-0.339163	34.4157	0	2	-4.60342	4	0	0.00654479	3.06238
529	-0.870344	35.7765	0	0	0	0	0	0	3.04961
756	0.604209	34.4157	0	2	-4.60525	2	0	0	3.04392
443	0.350363	42.6833	0	0	0	0	0	0	3.04304
754	2.137	16.405	0	1	-4.34609	0	0	0	3.0352
572	1.00597	32.7747	0	0	0	0	0	0.99537	3.02711
746	-0.711078	98.6916	0	0	0	0	0	0	3.02171
587	-1.0073	18.0108	0	2	-5.19657	2	0	0	3.01578
544	2.24557	42.6833	0	0	0	0	0	0	3.00782
479	-2.8278	0	0	1	0	0	0	0	3.00038
485	-0.185156	20.6251	0	0	0	0	0	0	2.99607
749	-0.605438	42.6833	0	0	0	0	0	0	2.99361
575	2.51744	42.6833	0	0	0	0	0	0	2.96772
585	1.86869	60.6941	0	0	0	0	0	0	2.92997
753	1.48241	18.0108	0	0	0	0	0	1.49306	2.90582
582	-0.539787	31.2914	0	2	-4.11699	0	0	0	2.90158
583	2.20428	0	0	0	0	0	0	1.67461	2.89687
586	5.15544	0	0	0	0	0	0	0	2.89633
553	-0.869064	36.0215	0	0	0	0	0	0	2.84869
592	1.03104	59.0883	0	1	-4.43848	1	0	0.831479	2.8332
596	2.40469	34.4157	0	1	-4.58669	1	0	1.28961	2.82907
595	2.21325	77.0991	0	1	-4.6566	1	0	1.27224	2.81652
593	2.74511	42.6833	0	0	0	2	0	1.44723	2.79361
580	0.0312	80.6808	0	1	0	0	0	0	2.75366
436	-0.6289	32.8972	0	0	0	0	0	0	2.74415
597	1.22955	16.405	0	1	-4.36858	1	0	0.870541	2.72902
598	3.99624	42.6833	0	1	0	0	1	0	2.65528
757	7.18777	42.6833	0	0	0	0	0	0	2.58513
601	3.4854	0	0	0	0	0	0	0	2.47767
599	2.49097	42.6833	0	1	0	0	1	1.44562	2.44952
603	1.11842	34.7963	0	0	0	0	0	0	2.33292
588	-0.371137	36.0215	0	1	0	0	0	0	2.31917
602	1.66857	34.7963	0	0	0	0	0	0	2.30809
606	3.92722	0	0	1	0	0	1	1.22866	2.22243
589	-0.526926	16.7855	0	0	0	0	0	0	2.14212
591	-0.0299393	0	0	0	0	0	0	1.19444	2.12474
758	0.849821	42.6833	0	0	0	0	0	0	1.79087
607	0.184393	0	0	0	0	0	0	0	0.861011
608	-0.0610162	42.6833	0	0	0	0	0	0	0.542939
759	-0.993213	85.3667	0	0	0	0	0	0	0.52578
609	-1.48196	128.05	0	0	0	0	0	0	0.231913

## Sheet: Normalized_TRAIN
No.	LOGPcons	SAdon	D/Dtr03	nHM	minddssS	F06[O-O]	Cl-089	MaxsssN	Log(1/LC50)	Group
2	0.85582	0	0.70742	0.125	1	0	0.16667	0	1	1
4	0.77446	0	0.68754	0	1	0	0	0	0.98128
610	0.78072	0	0.68754	0.25	1	0	0	0	0.97963
5	0.79906	0	0.71922	0.25	1	0	0	0	0.97265
611	0.78072	0	0.68754	0.25	1	0	0	0	0.95204
8	0.85619	0.20731	0	0.125	1	0	0	0	0.94751
612	0.76508	0	0.5507	0.25	1	0	0	0	0.94579
613	0.69994	0	0.19229	0.75	1	0	0.33333	0	0.94501
7	0.75471	0	0	0.25	1	0	0.16667	0.55205	0.94497
12	0.69669	0	0.67651	0	1	0	0	0	0.92154
14	0.70487	0	0	0.625	1	0	0.33333	0	0.91309
13	0.69999	0	0	0.5	1	0	0.33333	0	0.90983
614	0.73631	0	0.52771	0	1	0	0	0	0.88827
19	0.73316	0	0.62681	0	1	0	0	0	0.88534
23	0.78072	0	0.68754	0.25	1	0	0	0	0.88429
22	0.7907	0	0.62665	0	1	0	0	0	0.87772
615	0.63746	0	0	0.5	1	0	0.33333	0	0.87693
18	0.623	0	0	0.375	1	0	0	0	0.87124
25	0.68858	0	0	0.75	1	0	0	0	0.86524
28	0.5681	0	0	0.5	1	0	0	0	0.85963
33	0.81994	0	1	0	1	0	0	0	0.85934
21	0.62104	0	0	0.25	1	0	0.16667	0	0.858
616	0.7584	0	0	0	1	0	0	0	0.8547
26	0.61473	0.24565	0	0	1	0.5	0	0	0.84831
34	0.77066	0	0	0.25	1	0	0.16667	0	0.83895
618	0.75787	0	0	0.875	1	0	0.33333	0	0.8347
32	0.61333	0	0	0.375	1	0	0	0	0.83375
38	0.78765	0	0	0.625	1	0	0.33333	0	0.81762
29	0.55275	0	0	0.375	1	0	0	0	0.81327
37	0.70866	0.10295	0	0	1	0.08333	0	0.34504	0.81298
35	0.6717	0.07677	0	0.25	1	0	0	0	0.81093
42	0.79697	0	0.62665	0.25	1	0	0	0	0.80893
39	0.49586	0	0	0.125	1	0	0	0	0.80785
619	0.49619	0	0	0.5	1	0.16667	0	0.49136	0.80725
620	0.72942	0	0	0.125	1	0.33333	0	0.48452	0.8063
45	0.70892	0	0	0	1	0.25	0	0	0.79906
40	0.67408	0	0.53539	0	1	0.08333	0	0	0.79813
44	0.71287	0	0	0	1	0.83333	0	0	0.79467
46	0.76838	0	0	0	1	0.08333	0	0	0.79435
622	0.63941	0	0.53427	0	1	0.16667	0	0.41847	0.78896
621	0.72162	0	0	0.25	1	0	0.33333	0	0.78777
43	0.58856	0	0	0.5	1	0	0	0	0.78734
50	0.69264	0	0.2036	0.875	1	0	0.33333	0	0.78595
41	0.44201	0	0	0.125	1	0.5	0	0	0.78396
49	0.49966	0	0	0.375	1	0.33333	0	0	0.78311
48	0.80807	0	0	0.5	1	0	0	0	0.78098
623	0.56804	0	0	0.375	1	0.16667	0	0.48554	0.77607
53	0.68851	0.10365	0	0.125	1	0	0.16667	0	0.77177
57	0.65125	0	0	0.125	1	0.33333	0	0.48012	0.76549
54	0.56515	0	0	0.25	1	0.16667	0	0	0.76328
59	0.82095	0	0	0.25	1	0.08333	0.33333	0	0.76155
60	0.65263	0	0	0.125	1	0	0	0.74905	0.75748
77	1	0.24565	0	0.25	1	0	0	0	0.75646
625	0.73325	0	0	0.25	1	0	0	0	0.75572
67	0.74186	0	0	0	1	0	0	0	0.75508
78	0.95648	0.24565	0	0.125	1	0	0	0	0.755
58	0.84404	0	0	0.5	1	0	0.33333	0	0.75344
627	0.81441	0	0	0.25	1	0	0	0	0.75292
56	0.80973	0	0	0.75	1	0	1	0	0.75122
62	0.55495	0	0.56827	0	1	0.16667	0	0.47907	0.74519	2
71	0.63075	0.10365	0	0	1	0.16667	0	0	0.73996
64	0.64512	0.20026	0	0.125	1	0	0	0	0.73972
631	0.9038	0.24565	0	0	1	0	0	0	0.73611
75	0.72893	0	0	0	1	0.66667	0	0	0.73251
94	0.96256	0.24565	0	0	1	0	0	0	0.72873
81	0.67303	0	0	0.625	1	0	0.16667	0	0.72589
73	0.5294	0	0	0.5	1	0	0	0.7322	0.72237
90	0.74968	0	0	0.625	1	0	0.33333	0	0.72063
74	0.5904	0.2059	0	0	1	0	0	0	0.72047
87	0.6549	0	0	0	1	0.25	0	0	0.71922
88	0.7095	0.24565	0	0.625	1	0	0.33333	0	0.71715
632	0.83475	0	0	0.5	1	0	0.33333	0	0.71589
634	0.79196	0	0	1	1	0	0.33333	0	0.71568
83	0.69277	0.18933	0	0	1	0	0	0	0.71221
86	0.53839	0	0	0.25	1	0	0	0	0.71216
91	0.7374	0	0	0	1	0.33333	0	0.52613	0.71108
635	0.70009	0	0	0.25	1	0	0.33333	0	0.71099
93	0.63972	0	0	0.75	1	0	0	0	0.70663
84	0.6339	0	0	0.125	1	0	0	0.70863	0.69986
99	0.67738	0	0	0.25	1	0.16667	0	0	0.69452
109	0.86924	0.2066	0	0	1	0	0	0	0.69402
96	0.6868	0.10365	0	0.375	1	0	0.16667	0	0.69387
101	0.52377	0	0	0.375	1	0.5	0.16667	0.47286	0.69257
105	0.72256	0	0	0	1	0.33333	0	0.48273	0.68573
103	0.65442	0.20731	0	0.125	1	0	0.16667	0	0.68451
68	0.48304	0.18933	0	0	1	0	0	0	0.68206
122	0.84321	0.2066	0	0	1	0	0	0	0.68055
108	0.69352	0.10365	0	0.375	1	0	0.33333	0	0.67835
637	0.70375	0.10365	0	0	1	0.33333	0	0	0.67683
638	0.5685	0.20731	0	0	1	0.16667	0	0	0.66826
104	0.52799	0.10365	0	0.125	1	0	0	0	0.66746
118	0.74594	0	0	0.625	1	0	0.5	0	0.66712
115	0.64235	0	0	0	1	0.25	0	0	0.66657
119	0.7414	0	0	0.25	1	0.16667	0.33333	0.41417	0.66585
639	0.60834	0	0	0.5	1	0	0	0.38478	0.66559
121	0.72148	0.18933	0	0.25	1	0	0.33333	0	0.66543
110	0.72845	0.24565	0	0.625	1	0	0.83333	0	0.66408
52	0.30686	0.44931	0	0	1	0	0	0	0.66346
126	0.77635	0	0	0.125	1	0.16667	0.16667	0	0.66024
131	0.7842	0	0	0.125	1	0	0.16667	0.47668	0.65988
644	0.83675	0	0	0	1	0	0	0	0.65902
641	0.52418	0	0	0.375	1	0.33333	0	0.44885	0.65794
80	0.45825	0	0	0.125	1	0	0	0	0.65785
113	0.70481	0.24565	0	0.25	1	0	0.33333	0	0.65688
116	0.76883	0	0	0.625	1	0	0.83333	0	0.65571
128	0.79754	0	0	0.25	1	0	0.33333	0	0.65482
124	0.64733	0	0	0.5	1	0	0	0.33198	0.65261
111	0.59193	0	0	0.125	1	0	0	0.6577	0.65022
100	0.61365	0	0	0	1	0	0	0	0.64977
127	0.76497	0	0	0.25	1	0	0.33333	0	0.64876
97	0.46841	0.49129	0	0	1	0	0	0	0.64851
132	0.72678	0	0	0.25	1	0	0.33333	0	0.64701
140	0.73255	0.10365	0	0.375	1	0	0.5	0	0.64544
123	0.58747	0.0966	0	0	1	0	0	0	0.64543
150	0.74404	0	0	0.125	1	0.08333	0.16667	0	0.64496
134	0.64223	0	0	0.25	1	0	0	0	0.64457
120	0.56209	0	0	0	1	0	0	0	0.64349
114	0.48569	0.20026	0	0	1	0	0	0	0.64268
159	0.85452	0	0	0.5	1	0	0.33333	0	0.64151
135	0.67091	0	0	0.125	1	0	0	0.69503	0.63864
136	0.62954	0	0	0	1	0	0	0	0.63556
154	0.66431	0	0	0	1	0	0	0	0.63498
647	0.732	0	0	0.625	1	0	0.66667	0	0.63457
152	0.73813	0	0	0.125	1	0	0.16667	0	0.63353
643	0.63454	0	0	0.25	1	0	0.16667	0	0.63253
172	0.70915	0	0	0.125	1	0.16667	0.16667	0.29962	0.63231
141	0.71547	0.10365	0	0	1	0.33333	0	0	0.63148
147	0.65242	0	0	0.625	1	0	0.33333	0	0.63077
649	0.58875	0	0	0.25	1	0	0	0	0.63023
146	0.5715	0	0	0.25	1	0	0	0.785	0.62884
153	0.71726	0.24565	0	0.25	1	0	0.33333	0	0.62871
130	0.78013	0.24565	0	0	1	0	0	0	0.62746
148	0.55801	0	0	0.125	1	0	0	0.54593	0.62724
149	0.74597	0	0	0.375	1	0	0	0	0.62661
648	0.56599	0.10365	0	0.375	1	0.08333	0.16667	0	0.62566
142	0.71975	0	0	0.5	1	0	0.66667	0	0.62547
133	0.60181	0.10365	0	0	1	0	0	0	0.62291
177	0.8138	0	0	0.5	1	0	0.5	0	0.61883
169	0.69917	0	0	0.125	1	0	0.16667	0	0.6182
161	0.60834	0	0	0.5	1	0	0	0.38478	0.61776
145	0.45486	0	0	0.25	1	0.33333	0	0	0.61771
167	0.72787	0	0	0	1	0.16667	0	0	0.61653
171	0.64791	0	0	0.5	1	0.33333	0.16667	0.57809	0.61635
187	0.63308	0	0	0.5	0.36959	0	0	0.71447	0.61501
188	0.77257	0	0	0.25	1	0	0.33333	0	0.61485
125	0.47194	0	0	0.25	1	0	0	0	0.6128
160	0.76451	0	0	0	1	0	0	0	0.61193
176	0.72175	0	0	0.25	1	0.16667	0.33333	0	0.60987
189	0.72102	0	0	0.25	1	0	0.33333	0	0.60985
144	0.51877	0.24565	0	0.25	1	0	0	0	0.60794
650	0.60639	0.24565	0	0.25	1	0	0.33333	0	0.60587
174	0.6281	0.10365	0	0	1	0	0	0	0.60446
143	0.53921	0	0	0	1	0.33333	0	0	0.60422
197	0.48314	0.10365	0	0	1	0.25	0	0	0.60265
179	0.67533	0	0	0.5	1	0	0.33333	0	0.60227
184	0.69556	0	0	0.625	1	0	0.5	0	0.60206
193	0.6902	0.18933	0	0	1	0.33333	0	0.51265	0.60071
183	0.66147	0.10295	0	0.125	1	0	0	0.59327	0.60051
657	0.74472	0	0	0	1	0	0	0	0.59908
651	0.49691	0	0	0.375	1	0	0	0	0.59827
656	0.77274	0	0	0	1	0	0	0.7189	0.59764
654	0.64876	0.18933	0	0.125	1	0.16667	0.16667	0	0.59745
664	0.72318	0	0	0.125	1	0.16667	0.16667	0.32121	0.59625
658	0.74464	0	0	0	1	0.33333	0	0.67663	0.59625
207	0.72686	0	0	0.25	1	0.16667	0.33333	0	0.5942
180	0.4714	0.24565	0	0.5	1	0	0	0	0.59399
165	0.53489	0.0966	0	0.125	1	0	0	0	0.59375
158	0.69056	0	0	0	1	0	0	0	0.59346
215	0.71922	0	0	0.125	1	0.08333	0.16667	0	0.59316
208	0.61047	0.09441	0	0.5	0.36463	0	0	0	0.59315
106	0.49532	0	0	0	1	0	0	0	0.59305
107	0.40945	0	0	0	1	0	0	0	0.59166
191	0.62593	0	0	0.375	1	0	0	0	0.59131
173	0.59485	0.10365	0	0.125	1	0	0	0	0.59114
206	0.86341	0	0	0.25	1	0	0	0	0.59083
218	0.7415	0.09441	0	0.375	0.19342	0	0.33333	0	0.58985
196	0.5393	0	0	0.25	1	0	0	0	0.58944
199	0.62669	0.10365	0	0	1	0.08333	0	0	0.58874
671	0.89905	0	0	0.75	1	0	0	0	0.58771
200	0.68658	0	0	0.5	1	0	0.16667	0.69143	0.58687
213	0.69747	0	0	0.125	1	0	0	0	0.5862
182	0.63426	0.10365	0	0	1	0	0	0	0.58442
237	0.80557	0	0.7878	0.25	1	0	0	0	0.58438
666	0.72059	0	0.61691	0	1	0	0	0	0.58419
194	0.67491	0	0	0.125	1	0	0	0.75457	0.58403
190	0.63221	0.0966	0	0.25	1	0	0.33333	0	0.58355
222	0.66433	0	0	0.25	1	0	0.33333	0.51939	0.5833
201	0.5411	0	0	0	1	0.16667	0	0.55837	0.58217
217	0.75143	0	0	0.25	1	0.16667	0.33333	0.43198	0.58212
668	0.74755	0	0	0	1	0	0	0	0.57939
225	0.63381	0	0	0.125	1	0.16667	0.16667	0	0.5761
228	0.70107	0	0	0.375	1	0	0.5	0.64942	0.57554
214	0.61149	0.24565	0	0.125	1	0	0.16667	0	0.57188
219	0.63416	0	0	0.125	1	0	0	0.68365	0.57145
223	0.70666	0.3493	0	0.25	1	0	0.33333	0	0.57034
665	0.59643	0.49129	0	0.125	1	0	0.16667	0	0.57017
227	0.70962	0	0	0.125	1	0	0.16667	0	0.57013
669	0.69347	0.24565	0	0.125	1	0	0.16667	0	0.56971
238	0.66588	0	0	0.375	1	0	0.33333	0	0.56954
232	0.70809	0	0	0.125	1	0	0	0	0.56926
209	0.59095	0.20731	0	0.125	1	0	0	0	0.56902
186	0.38084	0	0	0.125	1	0	0	0	0.56883
667	0.66191	0	0	0.125	1	0	0	0.63398	0.56877
220	0.58728	0	0	0.25	1	0.16667	0	0	0.56764
239	0.61768	0	0.4441	0.125	0.26436	0	0	0	0.56721
233	0.69006	0.24565	0	0.25	1	0	0.33333	0	0.56607
234	0.69006	0.24565	0	0.25	1	0	0.33333	0	0.56607
660	0.55891	0.0966	0	0	1	0	0	0	0.56511
226	0.65608	0	0	0.25	1	0	0.33333	0	0.56473
204	0.57599	0.10365	0	0	1	0	0	0	0.56385
221	0.62736	0.24565	0	0.375	1	0	0.5	0	0.56368
212	0.60946	0	0	0.375	1	0	0.16667	0.82139	0.56279
673	0.72434	0.10365	0	0	1	0	0	0	0.56232
255	0.56656	0	0	0.125	0.2055	0	0	0	0.55886
240	0.622	0.20731	0	0	1	0.16667	0	0	0.55825
250	0.62417	0.18933	0	0.25	1	0	0.33333	0	0.55716
242	0.64497	0	0	0.125	1	0	0	0.55939	0.55705
257	0.69957	0.10365	0	0.125	1	0.08333	0	0	0.55325
252	0.69436	0.24565	0	0	1	0	0	0	0.55303
259	0.58236	0	0	0	1	0	0	0.494	0.55191
268	0.65909	0	0	0.125	1	0.08333	0.16667	0.17467	0.55106
248	0.66546	0	0	0.125	1	0	0.16667	0	0.54878
276	0.70767	0.10365	0	0.125	1	0	0.16667	0	0.54798
253	0.63882	0	0	0.125	1	0	0	0.66319	0.54533
273	0.64964	0	0	0.5	1	0	0.16667	0.66357	0.54421
265	0.65375	0	0	0.25	1	0	0.33333	0	0.54417
235	0.39572	0.10365	0	0.125	1	0	0	0	0.5433
680	0.78536	0	0	0	1	0	0	0	0.54309
267	0.73558	0.10365	0	0.25	1	0	0.16667	0	0.54261
210	0.48507	0	0	0.125	1	0	0	0	0.54246
224	0.61943	0	0	0.25	1	0	0.33333	0	0.54236
272	0.69217	0	0	0	1	0	0	0	0.54045
681	0.56693	0.18008	0	0.125	0.21565	1	0	0.58644	0.54027
247	0.55576	0.10365	0	0	1	0	0	0.57575	0.53867
285	0.63473	0	0	0.125	1	0	0.16667	0.69266	0.53738
689	0.66297	0.59495	0	0	1	0.08333	0	0	0.53399
683	0.68023	0	0.45971	0.125	1	0	0.16667	0	0.53338
675	0.5839	0.20731	0	0.125	1	0	0	0	0.5331
678	0.59642	0	0	0.25	1	0	0.33333	0.32925	0.5331
682	0.65394	0	0	0.25	1	0	0	0.48319	0.53292
677	0.57627	0	0	0.5	1	0	0	0	0.5325
287	0.72361	0	0	0.125	1	0	0.16667	0.66275	0.53239
229	0.65492	0	0	0	1	0	0	0	0.53235
258	0.52608	0.10365	0	0.125	1	0	0	0	0.53211
275	0.62949	0	0	0.25	1	0	0.33333	0.3434	0.53137
274	0.77789	0	0	0	1	0	0	1	0.5311
280	0.61852	0	0	0.25	1	0	0	0	0.53012
256	0.54096	0.20731	0	0.125	1	0	0	0	0.52952
236	0.48939	0.09441	0	0.125	1	0	0	0	0.52827
262	0.63736	0.10365	0.32325	0	1	0	0	0	0.52775
662	0.42784	0.24565	0	0.125	1	0	0.16667	0	0.52774
684	0.67952	0.24565	0	0.25	1	0	0.33333	0	0.5272
685	0.66909	0.24565	0	0.125	1	0	0.16667	0	0.52498
687	0.71427	0.10295	0	0	1	0	0	0.53784	0.52468
260	0.56129	0.24565	0	0	1	0	0	0	0.52292
679	0.47469	0.10365	0	0	1	0.16667	0	0	0.52181
298	0.67967	0.07677	0	0.25	1	0.16667	0	0	0.52086
297	0.67888	0.24565	0	0.25	1	0	0.33333	0	0.52068
283	0.58887	0.10365	0	0.25	1	0	0.33333	0.409	0.51966
295	0.74199	0.24565	0	0	1	0.08333	0	0	0.51844
294	0.63416	0	0	0.125	1	0	0	0.68365	0.51564
296	0.63867	0	0	0.125	1	0	0.16667	0	0.51512
289	0.62305	0.24565	0	0.25	1	0	0.33333	0	0.51456
306	0.68414	0	0	0.5	1	0	0.66667	0	0.51419
282	0.38069	0.10365	0	0.125	1	0.08333	0	0.52176	0.5138
291	0.54326	0	0	0.5	1	0	0	0	0.51134
308	0.67112	0	0	0	1	0	0	0.60267	0.51121
277	0.64751	0.24565	0	0.125	1	0	0	0	0.51065
292	0.58348	0	0	0.125	1	0	0	0.65546	0.5106
311	0.63105	0.18933	0	0.125	1	0	0	0.54592	0.50923
284	0.61132	0	0	0.25	1	0	0.33333	0	0.50846
266	0.59715	0.24565	0	0.25	1	0	0.33333	0	0.50787
317	0.6662	0	0	0.5	1	0.16667	0.16667	0.63185	0.50735
688	0.54151	0.10365	0	0.125	1	0	0	0.70574	0.50625
316	0.63132	0	0	0.375	1	0	0	0.76616	0.50542
309	0.59743	0.10365	0	0.25	1	0	0.16667	0.41723	0.50525
661	0.48633	0	0.06035	0	1	0	0	0	0.50297
335	0.54348	0.29248	0.60033	0.125	0.21207	0.33333	0	0	0.50186
307	0.66783	0.10365	0	0.25	1	0	0.33333	0	0.50165
301	0.60281	0.24565	0	0.125	1	0	0.16667	0	0.50047
299	0.62871	0	0	0.125	1	0	0	0.76373	0.49916	3
300	0.50694	0.10365	0	0	1	0	0	0.70574	0.49888
330	0.87015	0	0	0.625	1	0	0.33333	0	0.4981
321	0.65642	0.10365	0	0.125	1	0	0	0	0.49795
315	0.51175	0	0	0.25	1	0.25	0.16667	0.58511	0.49744
341	0.53639	0.19807	0	0.25	0.2024	0.08333	0	0	0.49689
304	0.61521	0	0	0.125	1	0	0	0.79742	0.49537
696	0.66202	0.10365	0	0	1	0	0	0	0.49512
290	0.58173	0.18933	0	0.25	1	0	0.33333	0	0.49375
692	0.66769	0	0	0.125	1	0	0	0.77269	0.49368
310	0.56797	0.20731	0	0.125	1	0	0	0	0.49289
318	0.52679	0	0	0.25	1	0.08333	0	0.58708	0.49224
340	0.65727	0.24565	0	0	1	0	0	0	0.49191
693	0.57283	0	0	0.25	1	0	0	0.67559	0.49106
326	0.57281	0	0	0.25	1	0	0	0	0.48986
686	0.6214	0.24565	0	0	1	0	0	0	0.48968
695	0.67301	0	0	0	1	0	0	0	0.48856
328	0.73914	0	0	0.25	1	0.16667	0.33333	0	0.48739
312	0.62386	0.10365	0	0.25	1	0	0.33333	0	0.48715
320	0.75986	0	0	0	1	0	0	0	0.48678
271	0.52699	0	0	0.25	1	0	0.16667	0	0.48659
332	0.63434	0	0.30039	0.25	1	0	0.33333	0.46758	0.4859
339	0.57948	0.10365	0	0.125	1	0	0.16667	0.31616	0.48356
324	0.51837	0.10365	0	0.125	1	0.08333	0	0	0.48235
347	0.56339	0.45295	0	0.125	1	0	0	0	0.48226
322	0.63413	0	0	0.5	1	0	0	0	0.48095
338	0.55319	0.20731	0	0.125	1	0	0	0	0.47873
313	0.48995	0	0	0	1	0	0	0	0.47749
697	0.47827	0	0	0	1	0	0	0	0.47696
700	0.60203	0	0	0.125	1	0	0	0.64606	0.47691
329	0.40415	0.10365	0	0.125	1	0.25	0	0	0.47572
279	0.43378	0	0	0	1	0	0	0	0.47498
314	0.49948	0	0	0.375	1	0	0	0.80713	0.47425
358	0.87153	0	0	0.625	1	0	0.66667	0	0.47189
699	0.61571	0.20731	0	0	1	0	0	0	0.47061
344	0.52784	0.43497	0	0.375	1	0	0.33333	0	0.46846
351	0.676	0.10365	0	0	1	0.08333	0	0	0.46757
355	0.581	0.3493	0.39079	0.25	1	0	0.33333	0	0.4638
293	0.46408	0	0	0.125	1	0	0	0	0.46267
408	0.67614	0.10365	0	0	1	0.33333	0	0	0.46185
345	0.3793	0.10365	0	0.25	1	0	0	0	0.46082
323	0.57047	0.24565	0	0	1	0	0	0	0.46071
702	0.55341	0.43497	0	0.25	1	0	0.33333	0	0.4546
703	0.50086	0	0	0	1	0	0	0.53421	0.45255
707	0.64328	0.24565	0	0.125	1	0	0.16667	0	0.45247
354	0.58973	0.10365	0	0	1	0	0	0	0.45035
362	0.55344	0.20731	0	0	1	0	0	0	0.45012
701	0.53104	0.10365	0	0.125	1	0	0.16667	0	0.44911
368	0.65414	0.24565	0	0.375	1	0	0.5	0	0.44863
705	0.63486	0	0	0.125	1	0	0	0.78539	0.44859
714	0.69361	0.24565	0	0.125	1	0.16667	0.16667	0	0.44661
370	0.0358	0	0	0.25	1	0	0	0	0.44572
381	0.63195	0.24565	0	0	1	0.08333	0	0	0.44549
394	0.59693	0	0	0	1	0.25	0	0	0.44544
244	0.34923	0	0	0	1	0	0	0	0.44333
367	0.54907	0.20731	0	0	1	0	0	0	0.44266
366	0.55488	0.10365	0	0	1	0	0	0.79243	0.44235
397	0.62976	0	0	0.125	0.30665	1	0	0.60222	0.44146
371	0.58396	0	0	0.125	1	0	0.16667	0.53736	0.44073
374	0.43965	0	0	0.375	1	0.25	0	0	0.43757
402	0.60937	0.1187	0	0.25	1	0	0.16667	0	0.43727
389	0.51628	0.10365	0	0.375	1	0	0	0	0.43684
398	0.6244	0.20731	0	0	1	0	0	0	0.43632
708	0.52724	0.10365	0	0.125	1	0	0	0.58164	0.43563
713	0.62914	0.24565	0	0.125	1	0	0.16667	0	0.43552
399	0.69308	0.24565	0	0.25	1	0	0.33333	0	0.43499
386	0.44219	0.10365	0	0.125	0.35394	0	0	0	0.43392
706	0.51803	0	0	0	1	0	0	0.75479	0.43352
413	0.7651	0	0	0	1	0	0	0.56548	0.43152
379	0.55722	0.20731	0	0	1	0	0	0	0.4305
377	0.63349	0.10365	0	0	1	0	0	0	0.42876
395	0.60004	0	0	0.25	1	0	0.33333	0	0.42836
373	0.55875	0	0	0.125	1	0	0	0.77358	0.42727
385	0.4819	0.20731	0	0.125	1	0	0	0	0.42679
710	0.52317	0.29298	0	0.125	1	0	0	0	0.42514
400	0.54756	0	0	0.25	1	0	0	0.79952	0.42115
718	0.69401	0	0	0.25	1	0.08333	0.33333	0.64827	0.42083
383	0.4826	0	0	0	1	0	0	0	0.41868
405	0.56845	0	0	0.125	1	0	0	0.57716	0.41824
704	0.5086	0	0	0	1	0	0	0	0.41704
393	0.65074	0	0	0	1	0	0	0.64853	0.4169
412	0.607	0	0	0	1	0.16667	0	0.55121	0.41599
372	0.58294	0	0	0	1	0	0	0	0.41072
407	0.57397	0.10365	0	0	1	0	0	0.47794	0.40725
717	0.40465	0.10365	0	0.375	1	0	0	0	0.40632
390	0.56347	0	0	0	1	0	0	0	0.40508
415	0.43818	0.24565	0.41233	0	1	0	0	0	0.40381
378	0.56064	0.10365	0	0	1	0	0	0	0.40363
432	0.76419	0.10365	0	0.25	1	0	0.33333	0	0.40213
724	0.45485	0.19807	0	0.25	0.21684	0.08333	0	0	0.40148
719	0.39726	0	0	0.375	1	0	0	0.36969	0.4004
403	0.24264	0.64867	0	0.125	1	0.33333	0	0	0.40034
434	0.73265	0.24565	0	0.125	1	0.16667	0.16667	0	0.40025
404	0.46514	0.10365	0	0.125	1	0	0	0	0.39926
416	0.38835	0.10365	0	0.125	0.40517	0	0	0	0.39727
440	0.41461	0.19807	0	0.125	0.18842	0.16667	0	0.45884	0.39689
414	0.50887	0.09441	0	0.125	0.38465	0	0	0.43752	0.39592
429	0.70132	0.24565	0	0	1	0	0	0	0.39566
425	0.54955	0.10365	0	0.125	1	0	0	0.4303	0.39514
410	0.55859	0.20731	0	0	1	0	0	0	0.39501
523	0.70246	0.20731	0	0	1	0	0	0	0.39302
715	0.37644	0.16245	0	0.25	1	0	0	0	0.39199
712	0.5033	0.18933	0	0	1	0	0	0	0.39146
423	0.48742	0.18933	0	0.125	1	0	0.16667	0.4666	0.38954
442	0.07904	0	0	0.25	1	0	0	0	0.38741
420	0.5243	0.43497	0	0.25	1	0	0.33333	0	0.38661
733	0.41601	0.29248	0	0.25	0.15706	0.16667	0	0	0.38646
422	0	0	0	0.25	1	0.33333	0	0	0.38641
460	0.58324	0.09441	0	0.25	0.19959	0.5	0.16667	0	0.3861
462	0.55458	0.09441	0	0.125	0.11751	0	0	0	0.38605
522	0.80006	0.20731	0.88467	0.125	1	0	0.16667	0	0.38453
427	0.54623	0.10365	0	0	1	0	0	0	0.38389
428	0.49859	0.10365	0	0.125	1	0	0.16667	0.43041	0.38302
490	0.30044	0.49129	0	0.125	1	0	0	0	0.38234
450	0.67292	0.24565	0	0.125	1	0	0.16667	0	0.38232
732	0.41393	0.30172	0	0.125	0.17283	0.16667	0	0.45008	0.38129
453	0.72759	0	0	0.125	1	0	0.16667	0	0.38014
509	0.56516	0	0	0.25	0.28985	0.08333	0.16667	0	0.38002
720	0.50229	0.3493	0	0	1	0.16667	0	0	0.37898
530	0.4997	0.19807	0	0.125	0.14583	0.25	0	0	0.37822
426	0.53852	0.18933	0	0	1	0	0	0	0.3778
521	0.45839	0.19807	0	0.125	0.2282	0.25	0	0	0.37692
430	0.55911	0.24565	0	0.125	1	0	0.16667	0	0.37547
510	0.61415	0.20731	0	0.125	1	0.16667	0.16667	0	0.37519
433	0.37096	0	0	0.25	0.40277	0	0	0	0.37512
536	0.79073	0.18933	0	0.125	1	0.08333	0.16667	0	0.3751
458	0.64049	0	0	0.125	1	0	0	0	0.37448
418	0.45103	0.10365	0	0	1	0	0	0	0.37375
531	0.44217	0.09441	0	0.25	0.19047	0.16667	0	0.35509	0.37225
744	0.73681	0.10295	0	0	1	0.08333	0	0.55259	0.37184
538	0.63852	0.09441	0	0.375	0.22963	0.16667	0.33333	0	0.37146
437	0.5938	0	0	0.125	1	0	0	0	0.37126
494	0.51281	0.24565	0	0.125	0.35966	0.16667	0	0	0.37068
484	0.54698	0.09441	0	0.125	0.16547	0.16667	0	0	0.37013
527	0.92773	0	0	0.25	1	0	0.16667	0	0.36843
419	0.35913	1	0	0.125	0.1506	0	0	0	0.36831
507	0.65998	0.24565	0	0.125	1	0	0.16667	0	0.36814
438	0.54672	0.20731	0	0	1	0	0	0	0.36807
539	0.46627	0.19807	0	0.125	0.20706	0.08333	0	0	0.36711
435	0.57964	0.24565	0	0	1	0	0	0	0.36639
511	0.55321	0.49129	0	0	1	0.33333	0	0	0.36637
454	0.68064	0	0	0	1	0	0	0	0.36574
558	0.48651	0.30172	0	0.125	0.20235	0.08333	0	0	0.36539
526	0.44251	0	0	0.25	1	0	0	0	0.36406
533	0.54829	0.45225	0	0	1	0	0	0	0.36383
469	0.5559	0	0	0.25	1	0	0	0.75219	0.36339
545	0.43898	0.44371	0	0.25	0.20411	0.08333	0	0	0.36318
524	0.57374	0.19807	0	0.125	0	0	0	0	0.36305
534	0.60919	0.43497	0	0.25	1	0	0.33333	0	0.36291
727	0.50186	0.10295	0	0.125	1	0	0	0.69019	0.36269
473	0.46858	0.3493	0	0	1	0.16667	0	0	0.36231
474	0.65309	0.49129	0	0.5	1	0	0.66667	0	0.36203
513	0.47406	0.49129	0	0	1	0.33333	0	0.36686	0.36065
543	0.47066	0.73694	0	0	1	0.58333	0	0	0.35955
451	0.48382	0.18862	0	0.125	1	0	0	0.402	0.35932
515	0.65467	0.24565	0	0	1	0	0	0	0.35862
528	0.50304	0.3493	0	0	1	0	0	0	0.35726
446	0.58196	0	0	0	1	0	0	0.7067	0.35601
512	0.52587	0.24565	0	0	1	0.16667	0	0.49797	0.35547
547	0.58856	0.68062	0	0.25	1	0	0.33333	0	0.35527
728	0.49399	0.10365	0	0.125	1	0	0	0.56102	0.35495
751	0.65004	0.24565	0	0	1	0	0	0	0.35441
568	0.65989	0.09441	0	0.25	0.27162	0.16667	0.16667	0	0.35413
447	0.60168	0.10365	0	0	1	0	0	0	0.35401
516	0.52924	0.24565	0.41557	0	1	0.08333	0	0	0.3538
461	0.59299	0.24565	0	0.125	1	0	0.16667	0	0.35362
472	0.46294	0.68062	0	0.25	1	0	0.16667	0	0.35323
549	0.46858	0.3493	0	0	1	0.16667	0	0	0.35265
540	0.56374	0	0	0.375	1	0	0	0.54686	0.35232
730	0.61521	0	0	0	1	0	0	0.63533	0.35196
565	0.45085	0.44371	0	0.125	0.19433	0.08333	0	0	0.3516
742	0.61322	0.24565	0	0.25	1	0	0.33333	0	0.35103
725	0.50461	0.29298	0	0.125	1	0	0.16667	0	0.35
480	0.49865	0.20731	0	0	1	0	0	0	0.34986
726	0.44957	0	0	0	1	0	0	0	0.34959
556	0.51351	0	0	0.25	1	0.16667	0	0.63743	0.34927
483	0.45264	0.10365	0	0	1	0	0	0	0.34838
444	0.53982	0.24565	0	0	1	0	0	0	0.34838
471	0.14704	0.12163	0	0.125	1	0	0	0	0.34836
464	0.55911	0.24565	0	0.125	1	0	0.16667	0	0.34759
542	0.58422	0.24565	0	0.375	1	0	0.33333	0	0.34623
750	0.53954	0.20731	0	0	1	0.08333	0	0.54757	0.34345
548	0.47332	0.29227	0	0	1	0	0	0.34626	0.34207
498	0.48043	0.09441	0	0.125	0.38699	0	0	0.43489	0.34187
574	0.70797	0	0	0.25	1	0	0.33333	0.45173	0.3411
470	0.52414	0.10365	0	0	1	0	0	0	0.34068
729	0.54118	0.24565	0	0	1	0	0	0	0.34027
500	0.49329	0.24565	0	0	1	0	0	0	0.3396
552	0.4724	0.225	0	0.5	0.24881	0	0.16667	0	0.33798
537	0.38942	0.07677	0	0.25	1	0	0	0	0.33294
481	0.41362	0.48231	0.23888	0	1	0	0	0	0.33285
502	0.47403	0.49129	0	0	1	0	0	0	0.33283
503	0.43292	0.43497	0	0	1	0	0	0	0.33254
546	0.42349	0	0	0.125	0.3539	0	0	0.2944	0.3323
468	0.43876	0.18933	0	0	1	0	0	0	0.331
508	0.36569	0.18933	0	0.125	1	0	0.16667	0.43438	0.33088
555	0.60016	0.24565	0	0.375	1	0	0.33333	0	0.33062
748	0.47021	0.18008	0	0.25	0.33284	0	0.16667	0	0.32933
445	0.43103	0.24565	0	0.125	1	0	0.16667	0	0.32892
496	0.48343	0.10365	0	0	1	0	0	0	0.32859
576	0.58105	0.1187	0	0.125	1	0	0	0	0.32722
554	0.40094	0.09441	0	0.125	0.35306	0	0	0	0.32715
563	0.53947	0	0	0.25	1	0	0	0.56553	0.3271
740	0.48538	0.24565	0	0	1	0	0	0	0.32695
745	0.43446	0.10365	0	0.125	1	0	0	0	0.32646
738	0.34201	0.29227	0	0.125	1	0	0.16667	0	0.32643
452	0.453	0.43497	0	0	1	0	0	0	0.32642
577	0.50901	0	0	0.25	0.37318	0	0.16667	0	0.32619
541	0.38876	0.18008	0	0.25	0.37369	0	0	0	0.32521
562	0.39222	0.29157	0	0	1	0	0	0.20156	0.32367
721	0.37093	0.24565	0	0	1	0	0	0	0.32223
561	0.52518	0	0	0	1	0	0	0	0.32132
752	0.38153	0.10365	0	0.125	0.4177	0	0	0	0.32125
431	0.22624	0	0	0	1	0	0	0	0.31855
505	0.42738	0.18933	0	0	1	0	0	0	0.31836
567	0.57753	0.24565	0	0	1	0	0	0	0.31662
755	0.35834	0.19807	0	0.25	0.16211	0.33333	0	0.00253	0.31522
529	0.31758	0.2059	0	0	1	0	0	0	0.3138
756	0.43072	0.19807	0	0.25	0.16178	0.16667	0	0	0.31316
443	0.41125	0.24565	0	0	1	0	0	0	0.31307
754	0.54834	0.09441	0	0.125	0.20895	0	0	0	0.31219
572	0.46155	0.18862	0	0	1	0	0	0.38478	0.31129
746	0.3298	0.56798	0	0	1	0	0	0	0.31069
587	0.30707	0.10365	0	0.25	0.05415	0.16667	0	0	0.31003
544	0.55667	0.24565	0	0	1	0	0	0	0.30914
479	0.16737	0	0	0.125	1	0	0	0	0.30832
485	0.37015	0.1187	0	0	1	0	0	0	0.30784
749	0.3379	0.24565	0	0	1	0	0	0	0.30756
575	0.57753	0.24565	0	0	1	0	0	0	0.30468
585	0.52775	0.3493	0	0	1	0	0	0	0.30047
753	0.49811	0.10365	0	0	1	0	0	0.57716	0.29778
582	0.34294	0.18008	0	0.25	0.25065	0	0	0	0.29731
583	0.5535	0	0	0	1	0	0	0.64735	0.29679
586	0.77996	0	0	0	1	0	0	0	0.29673
553	0.31767	0.20731	0	0	1	0	0	0	0.29142
592	0.46348	0.34006	0	0.125	0.19213	0.08333	0	0.32142	0.2897
596	0.56888	0.19807	0	0.125	0.16516	0.08333	0	0.49852	0.28924
595	0.55419	0.44371	0	0.125	0.15243	0.08333	0	0.49181	0.28784
593	0.595	0.24565	0	0	1	0.16667	0	0.55945	0.28529
580	0.38675	0.46432	0	0.125	1	0	0	0	0.28084
436	0.3361	0.18933	0	0	1	0	0	0	0.27978
597	0.47871	0.09441	0	0.125	0.20486	0.08333	0	0.33652	0.27809
598	0.69101	0.24565	0	0.125	1	0	0.16667	0	0.26988
757	0.93591	0.24565	0	0	1	0	0	0	0.26207
601	0.65181	0	0	0	1	0	0	0	0.2501
599	0.5755	0.24565	0	0.125	1	0	0.16667	0.55883	0.24697	4
603	0.47018	0.20026	0	0	1	0	0	0	0.23398
588	0.35588	0.20731	0	0.125	1	0	0	0	0.23245
602	0.5124	0.20026	0	0	1	0	0	0	0.23122
606	0.68571	0	0	0.125	1	0	0.16667	0.47496	0.22168
589	0.34393	0.0966	0	0	1	0	0	0	0.21273
591	0.38206	0	0	0	1	0	0	0.46173	0.2108
758	0.44957	0.24565	0	0	1	0	0	0	0.17362
607	0.39851	0	0	0	1	0	0	0	0.07006
608	0.37968	0.24565	0	0	1	0	0	0	0.03464
759	0.30815	0.49129	0	0	1	0	0	0	0.03273
609	0.27064	0.73694	0	0	1	0	0	0	0
1 mean	0.712271	0.0208073	0.174193	0.266949	1	0.0692088	0.0875703	0.0679008
2 mean	0.648196	0.0759391	0.0174693	0.196267	0.976585	0.0482655	0.121418	0.146566
3 mean	0.528889	0.168272	0.0107862	0.119388	0.866691	0.0438775	0.0578233	0.137133
4 mean	0.427684	0.222468	0	0.03125	1	0	0.0277783	0.124627
Diff (1 and others)	0.130761	-0.106136	0.160588	0.114229	0.0791535	0.0244041	0.00109883	-0.0732794
Diff (2 and others)	0.0889113	-0.0668581	-0.0234168	0.0526752	0.079941	0.00132465	0.0591813	0.0228343
Diff (3 and others)	-0.123191	0.097451	-0.0376319	-0.0843794	-0.115587	-0.00663619	-0.0529072	0.00736317
Diff (4 and others)	-0.172036	0.109635	-0.0319633	-0.137083	0.0720674	-0.0485714	-0.0601582	-0.00869672

## Sheet: 1 and others
Desc	Diff (1 and others)	Cluster	Weightage
D/Dtr03	0.160588	1	0.314733
LOGPcons	0.130761	1	0.256277
nHM	0.114229	1	0.223876
minddssS	0.0791535	1	0.155132
F06[O-O]	0.0244041	1	0.0478292
Cl-089	0.00109883	1	0.00215358
MaxsssN	-0.0732794	2	0.408435
SAdon	-0.106136	2	0.591565

## Sheet: 2 and others
Desc	Diff (2 and others)	Cluster	Weightage
LOGPcons	0.0889113	1	0.291639
minddssS	0.079941	1	0.262215
Cl-089	0.0591813	1	0.194121
nHM	0.0526752	1	0.17278
MaxsssN	0.0228343	1	0.0748989
F06[O-O]	0.00132465	1	0.00434501
D/Dtr03	-0.0234168	2	0.259394
SAdon	-0.0668581	2	0.740606

## Sheet: 3 and others
Desc	Diff (3 and others)	Cluster	Weightage
SAdon	0.097451	1	0.92975
MaxsssN	0.00736317	1	0.0702497
F06[O-O]	-0.00663619	2	0.015788
D/Dtr03	-0.0376319	2	0.0895288
Cl-089	-0.0529072	2	0.12587
nHM	-0.0843794	2	0.200744
minddssS	-0.115587	2	0.274989
LOGPcons	-0.123191	2	0.293081

## Sheet: 4 and others
Desc	Diff (4 and others)	Cluster	Weightage
SAdon	0.109635	1	0.603378
minddssS	0.0720674	1	0.396622
MaxsssN	-0.00869672	2	0.0189674
D/Dtr03	-0.0319633	2	0.0697113
F06[O-O]	-0.0485714	2	0.105933
Cl-089	-0.0601582	2	0.131204
nHM	-0.137083	2	0.298976
LOGPcons	-0.172036	2	0.375208

## Sheet: Standardized_TRAIN_TEST
No.	LOGPcons	SAdon	D/Dtr03	nHM	minddssS	F06[O-O]	Cl-089	MaxsssN	Log(1/LC50)	Set		ARKA_1 (1 and others)	ARKA_2 (1 and others)	ARKA_1 (2 and others)	ARKA_2 (2 and others)	ARKA_1 (3 and others)	ARKA_2 (3 and others)	ARKA_1 (4 and others)	ARKA_2 (4 and others)
2	1.89022	-0.790517	4.9806	-0.226197	0.317347	-0.398928	0.524324	-0.537456	2.83896	TRAIN		2.03321	-0.687268	0.655772	0.704203	-0.772803	1.10358	-0.350695	1.00603
4	1.29861	-0.790517	4.83416	-0.928322	0.317347	-0.398928	-0.567002	-0.537456	2.72848	TRAIN		1.67617	-0.687268	0.149836	0.666275	-0.772803	0.638421	-0.350695	0.421027
610	1.34416	-0.790517	4.83416	0.475928	0.317347	-0.398928	-0.567002	-0.537456	2.71878	TRAIN		2.00238	-0.687268	0.406072	0.666275	-0.772803	0.934021	-0.350695	0.857979
5	1.47749	-0.790517	5.06754	0.475928	0.317347	-0.398928	-0.567002	-0.537456	2.67761	TRAIN		2.11003	-0.687268	0.445005	0.726719	-0.772803	0.99409	-0.350695	0.924314
611	1.34416	-0.790517	4.83416	0.475928	0.317347	-0.398928	-0.567002	-0.537456	2.55596	TRAIN		2.00238	-0.687268	0.406072	0.666275	-0.772803	0.934021	-0.350695	0.857979
8	1.89292	0.63104	-0.230178	-0.226197	0.317347	-0.398928	-0.567002	-0.537456	2.52927	TRAIN		0.390319	0.154293	0.444841	0.407984	0.549245	0.497888	0.506504	0.499323
612	1.2304	-0.790517	3.82624	0.475928	0.317347	-0.398928	-0.567002	-0.537456	2.5191	TRAIN		1.65576	-0.687268	0.372853	0.405224	-0.772803	0.809975	-0.350695	0.744763
613	0.756688	-0.790517	1.18624	3.28443	0.317347	-0.398928	1.61565	-0.537456	2.51451	TRAIN		1.33636	-0.687268	1.14384	-0.278538	-0.772803	1.2731	-0.350695	1.50799
7	1.155	-0.790517	-0.230178	0.475928	0.317347	-0.398928	0.524324	1.69124	2.5143	TRAIN		0.36087	0.222038	0.729705	-0.645389	-0.616794	0.560312	-0.350695	0.617847
12	0.733093	-0.790517	4.75292	-0.928322	0.317347	-0.398928	-0.567002	-0.537456	2.37601	TRAIN		1.5058	-0.687268	-0.0152949	0.645233	-0.772803	0.465412	-0.350695	0.203271
14	0.792535	-0.790517	-0.230178	2.5823	0.317347	-0.398928	1.61565	-0.537456	2.32617	TRAIN		0.742091	-0.687268	1.03283	-0.645389	-0.772803	1.015	-0.350695	1.21235
13	0.757072	-0.790517	-0.230178	1.88018	0.317347	-0.398928	1.61565	-0.537456	2.30696	TRAIN		0.575736	-0.687268	0.901012	-0.645389	-0.772803	0.863481	-0.350695	0.989115
614	1.0212	-0.790517	3.65693	-0.928322	0.317347	-0.398928	-0.567002	-0.537456	2.17973	TRAIN		1.23432	-0.687268	0.0688326	0.361372	-0.772803	0.451188	-0.350695	0.234592
19	0.998312	-0.790517	4.38686	-0.928322	0.317347	-0.398928	-0.567002	-0.537456	2.16243	TRAIN		1.45839	-0.687268	0.0621491	0.550425	-0.772803	0.510176	-0.350695	0.277104
23	1.34416	-0.790517	4.83416	0.475928	0.317347	-0.398928	-0.567002	-0.537456	2.15625	TRAIN		2.00238	-0.687268	0.406072	0.666275	-0.772803	0.934021	-0.350695	0.857979
22	1.41671	-0.790517	4.38567	-0.928322	0.317347	-0.398928	-0.567002	-0.537456	2.11751	TRAIN		1.56513	-0.687268	0.18432	0.550116	-0.772803	0.632658	-0.350695	0.433918
615	0.302352	-0.790517	-0.230178	1.88018	0.317347	-0.398928	1.61565	-0.537456	2.11282	TRAIN		0.459328	-0.687268	0.768234	-0.645389	-0.772803	0.730249	-0.350695	0.818595
18	0.197221	-0.790517	-0.230178	1.17805	0.317347	-0.398928	-0.567002	-0.537456	2.07923	TRAIN		0.270773	-0.687268	0.192633	-0.645389	-0.772803	0.283304	-0.350695	0.283308
25	0.674105	-0.790517	-0.230178	3.28443	0.317347	-0.398928	-0.567002	-0.537456	2.04386	TRAIN		0.864683	-0.687268	0.696286	-0.645389	-0.772803	0.846412	-0.350695	1.09195
28	-0.201953	-0.790517	-0.230178	1.88018	0.317347	-0.398928	-0.567002	-0.537456	2.01075	TRAIN		0.32586	-0.687268	0.197542	-0.645389	-0.772803	0.307473	-0.350695	0.343553
33	1.62932	-0.790517	7.13575	-0.928322	0.317347	-0.398928	-0.567002	-0.537456	2.00905	TRAIN		2.48583	-0.687268	0.246404	1.26239	-0.772803	0.942462	-0.350695	0.706155
21	0.183014	-0.790517	-0.230178	0.475928	0.317347	-0.398928	0.524324	-0.537456	2.00112	TRAIN		0.112043	-0.687268	0.278735	-0.645389	-0.772803	0.275521	-0.350695	0.211009
616	1.18181	-0.790517	-0.230178	-0.928322	0.317347	-0.398928	-0.567002	-0.537456	1.98166	TRAIN		0.0509994	-0.687268	0.11573	-0.645389	-0.772803	0.148407	-0.350695	0.0227226
26	0.137072	0.893943	-0.230178	-0.928322	0.317347	3.80155	-0.567002	-0.537456	1.94395	TRAIN		-0.0148306	0.309932	-0.172531	0.602796	0.793745	-0.0904936	0.665035	0.0761963
34	1.271	-0.790517	-0.230178	0.475928	0.317347	-0.398928	0.524324	-0.537456	1.88875	TRAIN		0.390566	-0.687268	0.596425	-0.645389	-0.772803	0.5943	-0.350695	0.619002
618	1.17798	-0.790517	-0.230178	3.98655	0.317347	-0.398928	1.61565	-0.537456	1.86364	TRAIN		1.15532	-0.687268	1.38832	-0.645389	-0.772803	1.41019	-0.350695	1.77676
32	0.126923	-0.790517	-0.230178	1.17805	0.317347	-0.398928	-0.567002	-0.537456	1.85807	TRAIN		0.252777	-0.687268	0.172106	-0.645389	-0.772803	0.262707	-0.350695	0.256947
38	1.39452	-0.790517	-0.230178	2.5823	0.317347	-0.398928	1.61565	-0.537456	1.76286	TRAIN		0.896198	-0.687268	1.20861	-0.645389	-0.772803	1.19138	-0.350695	1.43809
29	-0.313595	-0.790517	-0.230178	1.17805	0.317347	-0.398928	-0.567002	-0.537456	1.73724	TRAIN		0.140004	-0.687268	0.043475	-0.645389	-0.772803	0.133635	-0.350695	0.091752
37	0.820118	-0.0845739	-0.230178	-0.928322	0.317347	0.301151	-0.567002	0.855499	1.73552	TRAIN		-0.00798976	0.298976	0.117388	-0.122285	-0.0187688	0.0536325	0.0749887	-0.0122371
35	0.551344	-0.264062	-0.230178	0.475928	0.317347	-0.398928	-0.567002	-0.537456	1.7234	TRAIN		0.204152	-0.375607	0.17457	-0.255286	-0.2832	0.245935	-0.0332426	0.206169
42	1.46226	-0.790517	4.38567	0.475928	0.317347	-0.398928	-0.567002	-0.537456	1.71163	TRAIN		1.89134	-0.687268	0.440556	0.550116	-0.772803	0.928259	-0.350695	0.87087
39	-0.727317	-0.790517	-0.230178	-0.226197	0.317347	-0.398928	-0.567002	-0.537456	1.70526	TRAIN		-0.280461	-0.687268	-0.320267	-0.645389	-0.772803	-0.26984	-0.350695	-0.483264
619	-0.724865	-0.790517	-0.230178	1.88018	0.317347	1.00123	-0.567002	1.44621	1.70172	TRAIN		0.259202	0.122068	0.199228	-0.645389	-0.633946	0.176662	-0.350695	0.333568
620	0.971061	-0.790517	-0.230178	-0.226197	0.317347	2.40139	-0.567002	1.4186	1.69607	TRAIN		0.288739	0.110802	0.333565	-0.645389	-0.635879	0.27259	-0.350695	0.487626
45	0.821988	-0.790517	-0.230178	-0.928322	0.317347	1.70131	-0.567002	-0.537456	1.65339	TRAIN		0.0596967	-0.687268	0.0190635	-0.645389	-0.772803	0.0765831	-0.350695	0.110415
40	0.568705	-0.790517	3.71348	-0.928322	0.317347	0.301151	-0.567002	-0.537456	1.64786	TRAIN		1.1699	-0.687268	-0.0604958	0.376018	-0.772803	0.334898	-0.350695	0.143073
44	0.850731	-0.790517	-0.230178	-0.928322	0.317347	6.60186	-0.567002	-0.537456	1.62748	TRAIN		0.302281	-0.687268	0.0470586	-0.645389	-0.772803	0.163414	-0.350695	0.640652
46	1.25438	-0.790517	-0.230178	-0.928322	0.317347	0.301151	-0.567002	-0.537456	1.62561	TRAIN		0.103182	-0.687268	0.139722	-0.645389	-0.772803	0.180872	-0.350695	0.124146
622	0.31659	-0.790517	3.7052	-0.928322	0.317347	1.00123	-0.567002	1.15194	1.5938	TRAIN		1.13635	0.00200378	-0.00460858	0.373873	-0.654545	0.271484	-0.350695	0.154257
621	0.914406	-0.790517	-0.230178	0.475928	0.317347	-0.398928	1.61565	-0.537456	1.58676	TRAIN		0.301461	-0.687268	0.704018	-0.645389	-0.772803	0.627326	-0.350695	0.628244
43	-0.05323	-0.790517	-0.230178	1.88018	0.317347	-0.398928	-0.567002	-0.537456	1.58423	TRAIN		0.363933	-0.687268	0.240969	-0.645389	-0.772803	0.351049	-0.350695	0.399324
50	0.703611	-0.790517	1.26953	3.98655	0.317347	-0.398928	1.61565	-0.537456	1.57603	TRAIN		1.50629	-0.687268	1.2498	-0.256964	-0.772803	1.40617	-0.350695	1.70385
41	-1.11885	-0.790517	-0.230178	-0.226197	0.317347	3.80155	-0.567002	-0.537456	1.5643	TRAIN		-0.179072	-0.687268	-0.417794	-0.645389	-0.772803	-0.317353	-0.350695	-0.18484
49	-0.699674	-0.790517	-0.230178	1.17805	0.317347	2.40139	-0.567002	-0.537456	1.55929	TRAIN		0.175583	-0.687268	-0.0580588	-0.645389	-0.772803	0.0653186	-0.350695	0.243806
48	1.543	-0.790517	-0.230178	1.88018	0.317347	-0.398928	-0.567002	-0.537456	1.54669	TRAIN		0.772568	-0.687268	0.707068	-0.645389	-0.772803	0.818743	-0.350695	0.99791
623	-0.202415	-0.790517	-0.230178	1.17805	0.317347	1.00123	-0.567002	1.42273	1.51773	TRAIN		0.235674	0.112488	0.228554	-0.645389	-0.63559	0.188613	-0.350695	0.319105
53	0.673635	-0.0797387	-0.230178	-0.226197	0.317347	-0.398928	0.524324	-0.537456	1.49234	TRAIN		0.0803655	-0.266488	0.300528	-0.118702	-0.111779	0.278146	0.0779043	0.185056
57	0.402662	-0.790517	-0.230178	-0.226197	0.317347	2.40139	-0.567002	1.40084	1.45532	TRAIN		0.143229	0.103557	0.16626	-0.645389	-0.637122	0.106049	-0.350695	0.274139
54	-0.223447	-0.790517	-0.230178	0.475928	0.317347	1.00123	-0.567002	-0.537456	1.44226	TRAIN		0.0730134	-0.687268	-0.0460687	-0.645389	-0.772803	0.0413235	-0.350695	0.064039
59	1.63668	-0.790517	-0.230178	0.475928	0.317347	0.301151	1.61565	-0.537456	1.43206	TRAIN		0.519968	-0.687268	0.917723	-0.645389	-0.772803	0.850154	-0.350695	0.973307
60	0.412677	-0.790517	-0.230178	-0.226197	0.317347	-0.398928	-0.567002	2.48655	1.40806	TRAIN		0.0113776	0.546524	0.239411	-0.645389	-0.561123	0.0641782	-0.350695	0.00168941
77	2.93866	0.893943	-0.230178	0.475928	0.317347	-0.398928	-0.567002	-0.537456	1.40202	TRAIN		0.815305	0.309932	0.871666	0.602796	0.793745	0.945418	0.665035	1.10141
625	0.998909	-0.790517	-0.230178	0.475928	0.317347	-0.398928	-0.567002	-0.537456	1.39767	TRAIN		0.318729	-0.687268	0.305259	-0.645389	-0.772803	0.377071	-0.350695	0.374006
67	1.06153	-0.790517	-0.230178	-0.928322	0.317347	-0.398928	-0.567002	-0.537456	1.39389	TRAIN		0.0202078	-0.687268	0.0806086	-0.645389	-0.772803	0.113165	-0.350695	-0.0223823
78	2.62223	0.893943	-0.230178	-0.226197	0.317347	-0.398928	-0.567002	-0.537456	1.39339	TRAIN		0.577023	0.309932	0.657801	0.602796	0.793745	0.711577	0.665035	0.772816
58	1.80457	-0.790517	-0.230178	1.88018	0.317347	-0.398928	1.61565	-0.537456	1.3842	TRAIN		0.843895	-0.687268	1.20688	-0.645389	-0.772803	1.1704	-0.350695	1.38193
627	1.58908	-0.790517	-0.230178	0.475928	0.317347	-0.398928	-0.567002	-0.537456	1.38115	TRAIN		0.469812	-0.687268	0.477588	-0.645389	-0.772803	0.549991	-0.350695	0.595319
56	1.55505	-0.790517	-0.230178	3.28443	0.317347	-0.398928	5.98096	-0.537456	1.37109	TRAIN		1.1033	-0.687268	2.22383	-0.645389	-0.772803	1.92957	-0.350695	2.28008
62	-0.297577	-0.790517	3.95563	-0.928322	0.317347	1.00123	-0.567002	1.39661	1.33551	TRAIN		1.05801	0.101829	-0.165595	0.438736	-0.637418	0.114072	-0.350695	-0.0538765
71	0.253592	-0.0797387	-0.230178	-0.928322	0.317347	1.00123	-0.567002	-0.537456	1.30469	TRAIN		-0.119417	-0.266488	-0.149708	-0.118702	-0.111779	-0.101158	0.0779043	-0.176942
64	0.358108	0.582687	-0.230178	-0.226197	0.317347	-0.398928	-0.567002	-0.537456	1.30328	TRAIN		-0.00259218	0.125669	-0.00332301	0.372155	0.504277	0.0481893	0.477347	-0.0762301
631	2.23914	0.893943	-0.230178	-0.928322	0.317347	-0.398928	-0.567002	-0.537456	1.28198	TRAIN		0.321676	0.309932	0.42447	0.602796	0.793745	0.458204	0.665035	0.419221
75	0.967506	-0.790517	-0.230178	-0.928322	0.317347	5.2017	-0.567002	-0.537456	1.2607	TRAIN		0.264968	-0.687268	0.0755561	-0.645389	-0.772803	0.175226	-0.350695	0.536026
94	2.66641	0.893943	-0.230178	-0.928322	0.317347	-0.398928	-0.567002	-0.537456	1.2384	TRAIN		0.431057	0.309932	0.549233	0.602796	0.793745	0.583394	0.665035	0.579447
81	0.561029	-0.790517	-0.230178	2.5823	0.317347	-0.398928	0.524324	-0.537456	1.22163	TRAIN		0.680642	-0.687268	0.753518	-0.645389	-0.772803	0.809661	-0.350695	0.98257
73	-0.483395	-0.790517	-0.230178	1.88018	0.317347	-0.398928	-0.567002	2.41852	1.20088	TRAIN		0.253811	0.51877	0.337059	-0.645389	-0.565885	0.22501	-0.350695	0.294176
90	1.11845	-0.790517	-0.230178	2.5823	0.317347	-0.398928	1.61565	-0.537456	1.19064	TRAIN		0.825524	-0.687268	1.128	-0.645389	-0.772803	1.11049	-0.350695	1.33457
74	-0.0398104	0.621369	-0.230178	-0.928322	0.317347	-0.398928	-0.567002	-0.537456	1.18967	TRAIN		-0.261735	0.148568	-0.240983	0.400819	0.540251	-0.209528	0.500672	-0.435385
87	0.42917	-0.790517	-0.230178	-0.928322	0.317347	1.70131	-0.567002	-0.537456	1.18229	TRAIN		-0.0408648	-0.687268	-0.0956394	-0.645389	-0.772803	-0.0385127	-0.350695	-0.036892
88	0.826263	0.893943	-0.230178	2.5823	0.317347	-0.398928	1.61565	-0.537456	1.17007	TRAIN		0.750725	0.309932	1.04268	0.602796	0.793745	1.02488	0.665035	1.225
632	1.73703	-0.790517	-0.230178	1.88018	0.317347	-0.398928	1.61565	-0.537456	1.16263	TRAIN		0.826606	-0.687268	1.18716	-0.645389	-0.772803	1.15061	-0.350695	1.3566
634	1.42584	-0.790517	-0.230178	4.68868	0.317347	-0.398928	1.61565	-0.537456	1.16143	TRAIN		1.37604	-0.687268	1.58216	-0.645389	-0.772803	1.62394	-0.350695	2.07964
83	0.704589	0.507741	-0.230178	-0.928322	0.317347	-0.398928	-0.567002	-0.537456	1.14096	TRAIN		-0.0711689	0.0813007	-0.0236181	0.31662	0.434578	0.00858129	0.432155	-0.156235
86	-0.418017	-0.790517	-0.230178	0.475928	0.317347	-0.398928	-0.567002	-0.537456	1.14067	TRAIN		-0.0440041	-0.687268	-0.108484	-0.645389	-0.772803	-0.0380881	-0.350695	-0.157341
91	1.02909	-0.790517	-0.230178	-0.928322	0.317347	2.40139	-0.567002	1.58658	1.13429	TRAIN		0.146319	0.179338	0.241641	-0.645389	-0.62412	0.148466	-0.350695	0.302644
635	0.757804	-0.790517	-0.230178	0.475928	0.317347	-0.398928	1.61565	-0.537456	1.13375	TRAIN		0.261371	-0.687268	0.658291	-0.645389	-0.772803	0.581442	-0.350695	0.569519
93	0.318841	-0.790517	-0.230178	3.28443	0.317347	-0.398928	-0.567002	-0.537456	1.108	TRAIN		0.773735	-0.687268	0.592549	-0.645389	-0.772803	0.74232	-0.350695	0.958722
84	0.276506	-0.790517	-0.230178	-0.226197	0.317347	-0.398928	-0.567002	2.32338	1.0681	TRAIN		-0.0234822	0.479952	0.187412	-0.645389	-0.572544	0.02428	-0.350695	-0.0524749
99	0.592703	-0.790517	-0.230178	0.475928	0.317347	1.00123	-0.567002	-0.537456	1.03657	TRAIN		0.281948	-0.687268	0.192247	-0.645389	-0.772803	0.280455	-0.350695	0.370095
109	1.98782	0.626204	-0.230178	-0.928322	0.317347	-0.398928	-0.567002	-0.537456	1.0336	TRAIN		0.257339	0.151431	0.351087	0.404402	0.544748	0.384569	0.503588	0.324979
96	0.661163	-0.0797387	-0.230178	1.17805	0.317347	-0.398928	0.524324	-0.537456	1.03275	TRAIN		0.391725	-0.266488	0.539822	-0.118702	-0.111779	0.556746	0.0779043	0.60025
101	-0.524301	-0.790517	-0.230178	1.17805	0.317347	3.80155	0.524324	1.37153	1.02509	TRAIN		0.289868	0.0915976	0.353642	-0.645389	-0.639174	0.276612	-0.350695	0.637222
105	0.92124	-0.790517	-0.230178	-0.928322	0.317347	2.40139	-0.567002	1.41137	0.984685	TRAIN		0.118709	0.107854	0.197007	-0.645389	-0.636385	0.116865	-0.350695	0.25887
103	0.425727	0.63104	-0.230178	-0.226197	0.317347	-0.398928	0.524324	-0.537456	0.977524	TRAIN		0.016901	0.154293	0.228139	0.407984	0.549245	0.205509	0.506504	0.0920908
68	-0.820481	0.507741	-0.230178	-0.928322	0.317347	-0.398928	-0.567002	-0.537456	0.963038	TRAIN		-0.461587	0.0813007	-0.468939	0.31662	0.434578	-0.438264	0.432155	-0.728136
122	1.79856	0.626204	-0.230178	-0.928322	0.317347	-0.398928	-0.567002	-0.537456	0.954133	TRAIN		0.208888	0.151431	0.295822	0.404402	0.544748	0.329115	0.503588	0.254005
108	0.710044	-0.0797387	-0.230178	1.17805	0.317347	-0.398928	1.61565	-0.537456	0.941169	TRAIN		0.406421	-0.266488	0.765812	-0.118702	-0.111779	0.708575	0.0779043	0.761544
637	0.784401	-0.0797387	-0.230178	-0.928322	0.317347	2.40139	-0.567002	-0.537456	0.932165	TRAIN		0.083678	-0.266488	0.0108882	-0.118702	-0.111779	0.0767711	0.0779043	0.170528
638	-0.199094	0.63104	-0.230178	-0.928322	0.317347	1.00123	-0.567002	-0.537456	0.881648	TRAIN		-0.235304	0.154293	-0.281893	0.407984	0.549245	-0.233795	0.506504	-0.346699
104	-0.493617	-0.0797387	-0.230178	-0.226197	0.317347	-0.398928	-0.567002	-0.537456	0.876879	TRAIN		-0.220634	-0.266488	-0.252026	-0.118702	-0.111779	-0.201366	0.0779043	-0.395627
118	1.09119	-0.790517	-0.230178	2.5823	0.317347	-0.398928	2.70698	-0.537456	0.874894	TRAIN		0.820729	-0.687268	1.33176	-0.645389	-0.772803	1.24001	-0.350695	1.46731
115	0.33791	-0.790517	-0.230178	-0.928322	0.317347	1.70131	-0.567002	-0.537456	0.87168	TRAIN		-0.0642273	-0.687268	-0.122287	-0.645389	-0.772803	-0.0652518	-0.350695	-0.0711144
119	1.05824	-0.790517	-0.230178	0.475928	0.317347	1.00123	1.61565	1.13459	0.867399	TRAIN		0.40549	-0.00507318	0.877022	-0.645389	-0.65576	0.691872	-0.350695	0.862368
639	0.0906466	-0.790517	-0.230178	1.88018	0.317347	-0.398928	-0.567002	1.01592	0.86587	TRAIN		0.400766	-0.0534888	0.399485	-0.645389	-0.664066	0.393205	-0.350695	0.482792
121	0.913328	0.507741	-0.230178	0.475928	0.317347	-0.398928	1.61565	-0.537456	0.864941	TRAIN		0.301185	0.0813007	0.703703	0.31662	0.434578	0.62701	0.432155	0.62784
110	0.964027	0.893943	-0.230178	2.5823	0.317347	-0.398928	4.88963	-0.537456	0.856986	TRAIN		0.79254	0.309932	1.71806	0.602796	0.793745	1.47777	0.665035	1.70555
52	-2.10163	2.29055	-0.230178	-0.928322	0.317347	-0.398928	-0.567002	-0.537456	0.853278	TRAIN		-0.789562	1.13672	-0.843035	1.63768	2.09259	-0.813642	1.50719	-1.20857
126	1.31238	-0.790517	-0.230178	-0.226197	0.317347	1.00123	0.524324	-0.537456	0.834301	TRAIN		0.311091	-0.687268	0.492641	-0.645389	-0.772803	0.487699	-0.350695	0.573001
131	1.36944	-0.790517	-0.230178	-0.226197	0.317347	-0.398928	0.524324	1.38695	0.832166	TRAIN		0.258491	0.0978898	0.648034	-0.645389	-0.638094	0.482017	-0.350695	0.482547
644	1.75155	-0.790517	-0.230178	-0.928322	0.317347	-0.398928	-0.567002	-0.537456	0.827123	TRAIN		0.196853	-0.687268	0.282094	-0.645389	-0.772803	0.31534	-0.350695	0.236375
641	-0.521373	-0.790517	-0.230178	1.17805	0.317347	2.40139	-0.567002	1.27462	0.820751	TRAIN		0.221228	0.0520576	0.129911	-0.645389	-0.645958	0.117561	-0.350695	0.345098
80	-1.00075	-0.790517	-0.230178	-0.226197	0.317347	-0.398928	-0.567002	-0.537456	0.820219	TRAIN		-0.35046	-0.687268	-0.40011	-0.645389	-0.772803	-0.349957	-0.350695	-0.585803
113	0.792158	0.893943	-0.230178	0.475928	0.317347	-0.398928	1.61565	-0.537456	0.814468	TRAIN		0.270166	0.309932	0.668322	0.602796	0.793745	0.591507	0.665035	0.582402
116	1.25768	-0.790517	-0.230178	2.5823	0.317347	-0.398928	4.88963	-0.537456	0.807564	TRAIN		0.867714	-0.687268	1.80381	-0.645389	-0.772803	1.56381	-0.350695	1.81567
128	1.46646	-0.790517	-0.230178	0.475928	0.317347	-0.398928	1.61565	-0.537456	0.802343	TRAIN		0.442787	-0.687268	0.865218	-0.645389	-0.772803	0.789078	-0.350695	0.835265
124	0.374163	-0.790517	-0.230178	1.88018	0.317347	-0.398928	-0.567002	0.802786	0.789271	TRAIN		0.473346	-0.140449	0.466286	-0.645389	-0.678986	0.476275	-0.350695	0.585061
111	-0.028722	-0.790517	-0.230178	-0.226197	0.317347	-0.398928	-0.567002	2.11774	0.775188	TRAIN		-0.101621	0.396053	0.0828626	-0.645389	-0.586939	-0.0651517	-0.350695	-0.170842
100	0.12922	-0.790517	-0.230178	-0.928322	0.317347	-0.398928	-0.567002	-0.537456	0.772532	TRAIN		-0.218463	-0.687268	-0.191626	-0.645389	-0.772803	-0.160002	-0.350695	-0.371998
127	1.22958	-0.790517	-0.230178	0.475928	0.317347	-0.398928	1.61565	-0.537456	0.76659	TRAIN		0.382145	-0.687268	0.796048	-0.645389	-0.772803	0.719671	-0.350695	0.746434
97	-0.926868	2.5784	-0.230178	-0.928322	0.317347	-0.398928	-0.567002	-0.537456	0.765085	TRAIN		-0.488822	1.30713	-0.500004	1.85098	2.36029	-0.469436	1.68076	-0.768031
132	0.951857	-0.790517	-0.230178	0.475928	0.317347	-0.398928	1.61565	-0.537456	0.756249	TRAIN		0.311049	-0.687268	0.714954	-0.645389	-0.772803	0.638299	-0.350695	0.642289
140	0.993823	-0.0797387	-0.230178	1.17805	0.317347	-0.398928	2.70698	-0.537456	0.746996	TRAIN		0.481251	-0.266488	1.06039	-0.118702	-0.111779	0.92923	0.0779043	1.01093
123	-0.0611294	-0.128091	-0.230178	-0.928322	0.317347	-0.398928	-0.567002	-0.537456	0.746918	TRAIN		-0.267193	-0.295112	-0.247208	-0.154531	-0.156747	-0.215774	0.0487479	-0.443379
150	1.07743	-0.790517	-0.230178	-0.226197	0.317347	0.301151	0.524324	-0.537456	0.744122	TRAIN		0.21734	-0.687268	0.421236	-0.645389	-0.772803	0.407658	-0.350695	0.410687
134	0.337037	-0.790517	-0.230178	0.475928	0.317347	-0.398928	-0.567002	-0.537456	0.741871	TRAIN		0.14929	-0.687268	0.111992	-0.645389	-0.772803	0.183143	-0.350695	0.125804
120	-0.245688	-0.790517	-0.230178	-0.928322	0.317347	-0.398928	-0.567002	-0.537456	0.735503	TRAIN		-0.31444	-0.687268	-0.301099	-0.645389	-0.772803	-0.26985	-0.350695	-0.512589
114	-0.801227	0.582687	-0.230178	-0.928322	0.317347	-0.398928	-0.567002	-0.537456	0.730695	TRAIN		-0.456658	0.125669	-0.463316	0.372155	0.504277	-0.432623	0.477347	-0.720916
159	1.88077	-0.790517	-0.230178	1.88018	0.317347	-0.398928	1.61565	-0.537456	0.723776	TRAIN		0.863402	-0.687268	1.22913	-0.645389	-0.772803	1.19272	-0.350695	1.4105
135	0.545591	-0.790517	-0.230178	-0.226197	0.317347	-0.398928	-0.567002	2.26846	0.70686	TRAIN		0.0454036	0.457544	0.261866	-0.645389	-0.576389	0.103122	-0.350695	0.0473885
136	0.24481	-0.790517	-0.230178	-0.928322	0.317347	-0.398928	-0.567002	-0.537456	0.688718	TRAIN		-0.188872	-0.687268	-0.157874	-0.645389	-0.772803	-0.126134	-0.350695	-0.328652
154	0.497647	-0.790517	-0.230178	-0.928322	0.317347	-0.398928	-0.567002	-0.537456	0.685292	TRAIN		-0.124146	-0.687268	-0.0840451	-0.645389	-0.772803	-0.0520527	-0.350695	-0.233838
647	0.989834	-0.790517	-0.230178	2.5823	0.317347	-0.398928	3.7983	-0.537456	0.682865	TRAIN		0.796964	-0.687268	1.51388	-0.645389	-0.772803	1.34782	-0.350695	1.57226
152	1.03445	-0.790517	-0.230178	-0.226197	0.317347	-0.398928	0.524324	-0.537456	0.676725	TRAIN		0.172734	-0.687268	0.405886	-0.645389	-0.772803	0.383864	-0.350695	0.320362
643	0.281186	-0.790517	-0.230178	0.475928	0.317347	-0.398928	0.524324	-0.537456	0.67081	TRAIN		0.137175	-0.687268	0.307401	-0.645389	-0.772803	0.304286	-0.350695	0.247823
172	0.823692	-0.790517	-0.230178	-0.226197	0.317347	1.00123	0.524324	0.672131	0.669492	TRAIN		0.185988	-0.193757	0.440664	-0.645389	-0.688132	0.344515	-0.350695	0.412726
141	0.869666	-0.0797387	-0.230178	-0.928322	0.317347	2.40139	-0.567002	-0.537456	0.664607	TRAIN		0.105506	-0.266488	0.0357856	-0.118702	-0.111779	0.101754	0.0779043	0.202502
147	0.411189	-0.790517	-0.230178	2.5823	0.317347	-0.398928	1.61565	-0.537456	0.660415	TRAIN		0.644466	-0.687268	0.921482	-0.645389	-0.772803	0.903265	-0.350695	1.06934
649	-0.051844	-0.790517	-0.230178	0.475928	0.317347	-0.398928	-0.567002	-0.537456	0.657225	TRAIN		0.0497362	-0.687268	-0.00156126	-0.645389	-0.772803	0.0692006	-0.350695	-0.0200266
146	-0.177267	-0.790517	-0.230178	0.475928	0.317347	-0.398928	-0.567002	2.6317	0.649021	TRAIN		0.0176279	0.605746	0.199502	-0.645389	-0.550962	0.0324517	-0.350695	-0.00684637
153	0.882662	0.893943	-0.230178	0.475928	0.317347	-0.398928	1.61565	-0.537456	0.648247	TRAIN		0.293335	0.309932	0.694749	0.602796	0.793745	0.618025	0.665035	0.616341
130	1.33982	0.893943	-0.230178	-0.928322	0.317347	-0.398928	-0.567002	-0.537456	0.64088	TRAIN		0.0914507	0.309932	0.16187	0.602796	0.793745	0.194705	0.665035	0.0819774
148	-0.275324	-0.790517	-0.230178	-0.226197	0.317347	-0.398928	-0.567002	1.6665	0.639583	TRAIN		-0.164751	0.211948	-0.0229879	-0.645389	-0.618526	-0.137406	-0.350695	-0.271892
149	1.09142	-0.790517	-0.230178	1.17805	0.317347	-0.398928	-0.567002	-0.537456	0.635875	TRAIN		0.499689	-0.687268	0.453741	-0.645389	-0.772803	0.545305	-0.350695	0.618634
648	-0.217303	-0.0797387	-0.230178	1.17805	0.317347	0.301151	0.524324	-0.537456	0.630289	TRAIN		0.200441	-0.266488	0.28611	-0.118702	-0.111779	0.310557	0.0779043	0.345034
142	0.900745	-0.790517	-0.230178	1.88018	0.317347	-0.398928	3.7983	-0.537456	0.629163	TRAIN		0.616882	-0.687268	1.3664	-0.645389	-0.772803	1.18059	-0.350695	1.32892
133	0.0431537	-0.0797387	-0.230178	-0.928322	0.317347	-0.398928	-0.567002	-0.537456	0.61405	TRAIN		-0.240496	-0.266488	-0.216757	-0.118702	-0.111779	-0.185219	0.0779043	-0.404273
177	1.58468	-0.790517	-0.230178	1.88018	0.317347	-0.398928	2.70698	-0.537456	0.589955	TRAIN		0.789787	-0.687268	1.35439	-0.645389	-0.772803	1.24348	-0.350695	1.44243
169	0.751111	-0.790517	-0.230178	-0.226197	0.317347	-0.398928	0.524324	-0.537456	0.586247	TRAIN		0.100199	-0.687268	0.323151	-0.645389	-0.772803	0.300846	-0.350695	0.21411
161	0.0906466	-0.790517	-0.230178	1.88018	0.317347	-0.398928	-0.567002	1.01592	0.58368	TRAIN		0.400766	-0.0534888	0.399485	-0.645389	-0.664066	0.393205	-0.350695	0.482792
145	-1.02546	-0.790517	-0.230178	0.475928	0.317347	2.40139	-0.567002	-0.537456	0.583395	TRAIN		-0.0650931	-0.687268	-0.274654	-0.645389	-0.772803	-0.171262	-0.350695	-0.0882974
167	0.95983	-0.790517	-0.230178	-0.928322	0.317347	1.00123	-0.567002	-0.537456	0.576424	TRAIN		0.0613802	-0.687268	0.0565128	-0.645389	-0.772803	0.105769	-0.350695	0.087897
171	0.378371	-0.790517	-0.230178	1.88018	0.317347	2.40139	0.524324	1.79636	0.575335	TRAIN		0.611021	0.264929	0.764951	-0.645389	-0.609436	0.65982	-0.350695	1.04531
187	0.270569	-0.790517	-0.230178	1.88018	-2.5221	-0.398928	-0.567002	2.34692	0.567463	TRAIN		0.00671142	0.489557	-0.192089	-0.645389	-0.570897	-0.334926	-1.47796	0.575552
188	1.28486	-0.790517	-0.230178	0.475928	0.317347	-0.398928	1.61565	-0.537456	0.566494	TRAIN		0.396298	-0.687268	0.812191	-0.645389	-0.772803	0.735869	-0.350695	0.767165
125	-0.90119	-0.790517	-0.230178	0.475928	0.317347	-0.398928	-0.567002	-0.537456	0.554383	TRAIN		-0.167696	-0.687268	-0.24957	-0.645389	-0.772803	-0.179658	-0.350695	-0.338531
160	1.22626	-0.790517	-0.230178	-0.928322	0.317347	-0.398928	-0.567002	-0.537456	0.549288	TRAIN		0.0623787	-0.687268	0.12871	-0.645389	-0.772803	0.161431	-0.350695	0.0393914
176	0.915306	-0.790517	-0.230178	0.475928	0.317347	1.00123	1.61565	-0.537456	0.537099	TRAIN		0.368899	-0.687268	0.709882	-0.645389	-0.772803	0.649992	-0.350695	0.776999
189	0.91004	-0.790517	-0.230178	0.475928	0.317347	-0.398928	1.61565	-0.537456	0.537001	TRAIN		0.300344	-0.687268	0.702743	-0.645389	-0.772803	0.626047	-0.350695	0.626607
144	-0.560688	0.893943	-0.230178	0.475928	0.317347	-0.398928	-0.567002	-0.537456	0.525708	TRAIN		-0.0805278	0.309932	-0.150144	0.602796	0.793745	-0.0798905	0.665035	-0.210843
650	0.0764541	0.893943	-0.230178	0.475928	0.317347	-0.398928	1.61565	-0.537456	0.513509	TRAIN		0.0869458	0.309932	0.459336	0.602796	0.793745	0.381806	0.665035	0.314013
174	0.234321	-0.0797387	-0.230178	-0.928322	0.317347	-0.398928	-0.567002	-0.537456	0.505183	TRAIN		-0.191558	-0.266488	-0.160936	-0.118702	-0.111779	-0.129207	0.0779043	-0.332586
143	-0.412041	-0.790517	-0.230178	-0.928322	0.317347	2.40139	-0.567002	-0.537456	0.503777	TRAIN		-0.222611	-0.687268	-0.338473	-0.645389	-0.772803	-0.273786	-0.350695	-0.278138
197	-0.819809	-0.0797387	-0.230178	-0.928322	0.317347	1.70131	-0.567002	-0.537456	0.494514	TRAIN		-0.360603	-0.266488	-0.460341	-0.118702	-0.111779	-0.404463	0.0779043	-0.505259
179	0.577732	-0.790517	-0.230178	1.88018	0.317347	-0.398928	1.61565	-0.537456	0.492279	TRAIN		0.529825	-0.687268	0.848645	-0.645389	-0.772803	0.810935	-0.350695	0.921863
184	0.724887	-0.790517	-0.230178	2.5823	0.317347	-0.398928	2.70698	-0.537456	0.491029	TRAIN		0.726955	-0.687268	1.2248	-0.645389	-0.772803	1.13269	-0.350695	1.32994
193	0.685889	0.507741	-0.230178	-0.928322	0.317347	2.40139	-0.567002	1.53218	0.483091	TRAIN		0.0584589	0.92571	0.137345	0.31662	0.579452	0.0479072	0.432155	0.172909
183	0.476974	-0.0845739	-0.230178	-0.226197	0.317347	-0.398928	-0.567002	1.85764	0.481913	TRAIN		0.0278376	0.70785	0.211018	-0.122285	0.0513811	0.0830171	0.0749887	0.0138516
657	1.08238	-0.790517	-0.230178	-0.928322	0.317347	-0.398928	-0.567002	-0.537456	0.473468	TRAIN		0.0255456	-0.687268	0.0866969	-0.645389	-0.772803	0.119274	-0.350695	-0.0145633
651	-0.719629	-0.790517	-0.230178	1.17805	0.317347	-0.398928	-0.567002	-0.537456	0.468671	TRAIN		0.0360593	-0.687268	-0.0750868	-0.645389	-0.772803	0.0146669	-0.350695	-0.0605105
656	1.28613	-0.790517	-0.230178	-0.928322	0.317347	-0.398928	-0.567002	2.36483	0.464934	TRAIN		0.0777054	0.496864	0.363863	-0.645389	-0.569643	0.178973	-0.350695	0.116986
654	0.384561	0.507741	-0.230178	-0.226197	0.317347	1.00123	0.524324	-0.537456	0.463845	TRAIN		0.0735702	0.0813007	0.221719	0.31662	0.434578	0.21585	0.432155	0.225071
664	0.925688	-0.790517	-0.230178	-0.226197	0.317347	1.00123	0.524324	0.7593	0.456765	TRAIN		0.212099	-0.158192	0.476985	-0.645389	-0.68203	0.3744	-0.350695	0.452631
658	1.08176	-0.790517	-0.230178	-0.928322	0.317347	2.40139	-0.567002	2.19418	0.456731	TRAIN		0.159803	0.42724	0.302591	-0.645389	-0.581588	0.163898	-0.350695	0.33394
207	0.952504	-0.790517	-0.230178	0.475928	0.317347	1.00123	1.61565	-0.537456	0.444657	TRAIN		0.378422	-0.687268	0.720744	-0.645389	-0.772803	0.660891	-0.350695	0.790948
180	-0.905143	0.893943	-0.230178	1.88018	0.317347	-0.398928	-0.567002	-0.537456	0.443431	TRAIN		0.145844	0.309932	-0.00778941	0.602796	0.793745	0.101438	0.665035	0.0798569
165	-0.443492	-0.128091	-0.230178	-0.226197	0.317347	-0.398928	-0.567002	-0.537456	0.44201	TRAIN		-0.207802	-0.295112	-0.23739	-0.154531	-0.156747	-0.186679	0.0487479	-0.37683
158	0.688539	-0.790517	-0.230178	-0.928322	0.317347	-0.398928	-0.567002	-0.537456	0.440297	TRAIN		-0.0752776	-0.687268	-0.0283046	-0.645389	-0.772803	0.00387873	-0.350695	-0.162254
215	0.8969	-0.790517	-0.230178	-0.226197	0.317347	0.301151	0.524324	-0.537456	0.438549	TRAIN		0.171125	-0.687268	0.368522	-0.645389	-0.772803	0.354764	-0.350695	0.342989
208	0.106159	-0.143108	-0.230178	1.88018	-2.54443	-0.398928	-0.567002	-0.537456	0.438465	TRAIN		-0.038839	-0.304002	-0.462276	-0.165659	-0.170713	-0.38924	-1.09643	0.459095
106	-0.731245	-0.790517	-0.230178	-0.928322	0.317347	-0.398928	-0.567002	-0.537456	0.437864	TRAIN		-0.438742	-0.687268	-0.442881	-0.645389	-0.772803	-0.412118	-0.350695	-0.694673
107	-1.35564	-0.790517	-0.230178	-0.928322	0.317347	-0.398928	-0.567002	-0.537456	0.429653	TRAIN		-0.598589	-0.687268	-0.625206	-0.645389	-0.772803	-0.595067	-0.350695	-0.928822
191	0.218508	-0.790517	-0.230178	1.17805	0.317347	-0.398928	-0.567002	-0.537456	0.427621	TRAIN		0.276222	-0.687268	0.198849	-0.645389	-0.772803	0.289541	-0.350695	0.291291
173	-0.00749647	-0.0797387	-0.230178	-0.226197	0.317347	-0.398928	-0.567002	-0.537456	0.426575	TRAIN		-0.0961868	-0.266488	-0.110079	-0.118702	-0.111779	-0.0589327	0.0779043	-0.213332
206	1.94541	-0.790517	-0.230178	0.475928	0.317347	-0.398928	-0.567002	-0.537456	0.424784	TRAIN		0.561034	-0.687268	0.581637	-0.645389	-0.772803	0.654397	-0.350695	0.728944
218	1.05895	-0.143108	-0.230178	1.17805	-3.31559	-0.398928	1.61565	-0.537456	0.418963	TRAIN		-0.0673644	-0.304002	-0.0841369	-0.165659	-0.170713	-0.188253	-1.40258	0.892385
196	-0.4114	-0.790517	-0.230178	0.475928	0.317347	-0.398928	-0.567002	-0.537456	0.416576	TRAIN		-0.0423102	-0.687268	-0.106552	-0.645389	-0.772803	-0.0361494	-0.350695	-0.15486
199	0.224076	-0.0797387	-0.230178	-0.928322	0.317347	0.301151	-0.567002	-0.537456	0.412442	TRAIN		-0.160577	-0.266488	-0.161128	-0.118702	-0.111779	-0.121008	0.0779043	-0.262219
671	2.20455	-0.790517	-0.230178	3.28443	0.317347	-0.398928	-0.567002	-0.537456	0.406365	TRAIN		1.25648	-0.687268	1.14318	-0.645389	-0.772803	1.29483	-0.350695	1.66586
200	0.659535	-0.790517	-0.230178	1.88018	0.317347	-0.398928	0.524324	2.25394	0.401383	TRAIN		0.548584	0.451622	0.870169	-0.645389	-0.577405	0.697396	-0.350695	0.862612
213	0.738783	-0.790517	-0.230178	-0.226197	0.317347	-0.398928	-0.567002	-0.537456	0.397483	TRAIN		0.0948606	-0.687268	0.107834	-0.645389	-0.772803	0.159727	-0.350695	0.066523
182	0.279119	-0.0797387	-0.230178	-0.928322	0.317347	-0.398928	-0.567002	-0.537456	0.386973	TRAIN		-0.180089	-0.266488	-0.147855	-0.118702	-0.111779	-0.116082	0.0779043	-0.315786
237	1.52482	-0.790517	5.57272	0.475928	0.317347	-0.398928	-0.567002	-0.537456	0.386719	TRAIN		2.28127	-0.687268	0.458823	0.85756	-0.772803	1.05342	-0.350695	0.977423
666	0.9069	-0.790517	4.31395	-0.928322	0.317347	-0.398928	-0.567002	-0.537456	0.385608	TRAIN		1.41202	-0.687268	0.0354566	0.531541	-0.772803	0.47683	-0.350695	0.237721
194	0.574716	-0.790517	-0.230178	-0.226197	0.317347	-0.398928	-0.567002	2.50883	0.384661	TRAIN		0.0528595	0.555618	0.288398	-0.645389	-0.559563	0.111656	-0.350695	0.0628775
190	0.264233	-0.128091	-0.230178	0.475928	0.317347	-0.398928	1.61565	-0.537456	0.381826	TRAIN		0.135017	-0.295112	0.514168	-0.154531	-0.156747	0.436825	0.0487479	0.38443
222	0.497774	-0.790517	-0.230178	0.475928	0.317347	-0.398928	1.61565	1.55938	0.380325	TRAIN		0.194804	0.168239	0.739624	-0.645389	-0.626025	0.505253	-0.350695	0.511847
201	-0.398316	-0.790517	-0.230178	-0.928322	0.317347	1.00123	-0.567002	1.71675	0.373668	TRAIN		-0.286305	0.232449	-0.171	-0.645389	-0.615008	-0.292167	-0.350695	-0.378578
217	1.13111	-0.790517	-0.230178	0.475928	0.317347	1.00123	1.61565	1.20651	0.373369	TRAIN		0.424146	0.0242696	0.903695	-0.645389	-0.650725	0.713224	-0.350695	0.891062
668	1.10293	-0.790517	-0.230178	-0.928322	0.317347	-0.398928	-0.567002	-0.537456	0.357257	TRAIN		0.0308054	-0.687268	0.0926964	-0.645389	-0.772803	0.125294	-0.350695	-0.00685852
225	0.275815	-0.790517	-0.230178	-0.226197	0.317347	1.00123	0.524324	-0.537456	0.33787	TRAIN		0.0457312	-0.687268	0.189966	-0.645389	-0.772803	0.183987	-0.350695	0.184291
228	0.764901	-0.790517	-0.230178	1.17805	0.317347	-0.398928	2.70698	2.08431	0.334561	TRAIN		0.422647	0.382413	1.19018	-0.645389	-0.589279	0.862155	-0.350695	0.974893
214	0.113566	0.893943	-0.230178	-0.226197	0.317347	-0.398928	0.524324	-0.537456	0.312943	TRAIN		-0.0630121	0.309932	0.136988	0.602796	0.793745	0.114046	0.665035	-0.0249693
219	0.278421	-0.790517	-0.230178	-0.226197	0.317347	-0.398928	-0.567002	2.2225	0.31042	TRAIN		-0.0229921	0.438796	0.180405	-0.645389	-0.579606	0.024841	-0.350695	-0.0536735
223	0.8056	1.60472	-0.230178	0.475928	0.317347	-0.398928	1.61565	-0.537456	0.303892	TRAIN		0.273607	0.730713	0.672247	1.12948	1.45477	0.595446	1.09363	0.587442
665	0.00405447	2.5784	-0.230178	-0.226197	0.317347	-0.398928	0.524324	-0.537456	0.302862	TRAIN		-0.0910471	1.30713	0.105011	1.85098	2.36029	0.0819589	1.68076	-0.0660363
227	0.827104	-0.790517	-0.230178	-0.226197	0.317347	-0.398928	0.524324	-0.537456	0.302661	TRAIN		0.119654	-0.687268	0.345341	-0.645389	-0.772803	0.323112	-0.350695	0.242607
669	0.709646	0.893943	-0.230178	-0.226197	0.317347	-0.398928	0.524324	-0.537456	0.300151	TRAIN		0.0895844	0.309932	0.311044	0.602796	0.793745	0.288697	0.665035	0.198561
238	0.509016	-0.790517	-0.230178	1.17805	0.317347	-0.398928	1.61565	-0.537456	0.299139	TRAIN		0.354958	-0.687268	0.707112	-0.645389	-0.772803	0.649674	-0.350695	0.686159
232	0.815996	-0.790517	-0.230178	-0.226197	0.317347	-0.398928	-0.567002	-0.537456	0.297493	TRAIN		0.114627	-0.687268	0.130381	-0.645389	-0.772803	0.182351	-0.350695	0.0954782
209	-0.0358114	0.63104	-0.230178	-0.226197	0.317347	-0.398928	-0.567002	-0.537456	0.296102	TRAIN		-0.103435	0.154293	-0.118347	0.407984	0.549245	-0.0672289	0.506504	-0.22395
186	-1.56364	-0.790517	-0.230178	-0.226197	0.317347	-0.398928	-0.567002	-0.537456	0.294966	TRAIN		-0.494559	-0.687268	-0.564473	-0.645389	-0.772803	-0.514882	-0.350695	-0.796885
667	0.480169	-0.790517	-0.230178	-0.226197	0.317347	-0.398928	-0.567002	2.02201	0.294625	TRAIN		0.0286555	0.356994	0.224279	-0.645389	-0.59364	0.0839533	-0.350695	0.0181727
220	-0.0624807	-0.790517	-0.230178	0.475928	0.317347	1.00123	-0.567002	-0.537456	0.287942	TRAIN		0.114221	-0.687268	0.00093344	-0.645389	-0.772803	0.0884866	-0.350695	0.124401
239	0.158581	-0.790517	3.04101	-0.226197	-2.99608	-0.398928	-0.567002	-0.537456	0.285396	TRAIN		0.463173	-0.687268	-0.929702	0.201849	-0.772803	-0.627056	-1.66612	0.0779306
233	0.684904	0.893943	-0.230178	0.475928	0.317347	-0.398928	1.61565	-0.537456	0.278709	TRAIN		0.242709	0.309932	0.637004	0.602796	0.793745	0.560082	0.665035	0.542181
234	0.684904	0.893943	-0.230178	0.475928	0.317347	-0.398928	1.61565	-0.537456	0.278709	TRAIN		0.242709	0.309932	0.637004	0.602796	0.793745	0.560082	0.665035	0.542181
660	-0.268812	-0.128091	-0.230178	-0.928322	0.317347	-0.398928	-0.567002	-0.537456	0.273044	TRAIN		-0.32036	-0.295112	-0.307851	-0.154531	-0.156747	-0.276625	0.0487479	-0.52126
226	0.437773	-0.790517	-0.230178	0.475928	0.317347	-0.398928	1.61565	-0.537456	0.270755	TRAIN		0.179443	-0.687268	0.564841	-0.645389	-0.772803	0.487673	-0.350695	0.449507
204	-0.144589	-0.0797387	-0.230178	-0.928322	0.317347	-0.398928	-0.567002	-0.537456	0.265597	TRAIN		-0.288559	-0.266488	-0.271578	-0.118702	-0.111779	-0.240228	0.0779043	-0.474677
221	0.228932	0.893943	-0.230178	1.17805	0.317347	-0.398928	2.70698	-0.537456	0.264595	TRAIN		0.285439	0.309932	0.837045	0.602796	0.793745	0.705117	0.665035	0.724091
212	0.0988136	-0.790517	-0.230178	1.17805	0.317347	-0.398928	0.524324	2.77857	0.259357	TRAIN		0.247763	0.665669	0.624317	-0.645389	-0.540681	0.391978	-0.350695	0.452374
673	0.934127	-0.0797387	-0.230178	-0.928322	0.317347	-0.398928	-0.567002	-0.537456	0.256541	TRAIN		-0.0124071	-0.266488	0.0434071	-0.118702	-0.111779	0.075836	0.0779043	-0.0701581
255	-0.213143	-0.790517	-0.230178	-0.226197	-3.2612	-0.398928	-0.567002	-0.537456	0.23617	TRAIN		-0.703507	-0.687268	-1.10771	-0.645389	-0.772803	-1.10329	-1.77138	-0.290449
240	0.18996	0.63104	-0.230178	-0.928322	0.317347	1.00123	-0.567002	-0.537456	0.232532	TRAIN		-0.135706	0.154293	-0.168289	0.407984	0.549245	-0.119803	0.506504	-0.200804
250	0.205775	0.507741	-0.230178	0.475928	0.317347	-0.398928	1.61565	-0.537456	0.226105	TRAIN		0.120052	0.0813007	0.497098	0.31662	0.434578	0.419697	0.432155	0.362508
242	0.357016	-0.790517	-0.230178	-0.226197	0.317347	-0.398928	-0.567002	1.72087	0.225464	TRAIN		-0.00287152	0.234129	0.165733	-0.645389	-0.61472	0.0478696	-0.350695	-0.0337311
257	0.754012	-0.0797387	-0.230178	-0.226197	0.317347	0.301151	-0.567002	-0.537456	0.203024	TRAIN		0.132363	-0.266488	0.115081	-0.118702	-0.111779	0.175391	0.0779043	0.146442
252	0.716154	0.893943	-0.230178	-0.928322	0.317347	-0.398928	-0.567002	-0.537456	0.201775	TRAIN		-0.0682083	0.309932	-0.0202411	0.602796	0.793745	0.0119698	0.665035	-0.151898
259	-0.0982655	-0.790517	-0.230178	-0.928322	0.317347	-0.398928	-0.567002	1.45686	0.195144	TRAIN		-0.2767	0.126413	-0.108478	-0.645389	-0.633201	-0.226655	-0.350695	-0.419413
268	0.459664	-0.790517	-0.230178	-0.226197	0.317347	0.301151	0.524324	0.167696	0.190142	TRAIN		0.0591926	-0.399566	0.293735	-0.645389	-0.723442	0.226654	-0.350695	0.192423
248	0.506024	-0.790517	-0.230178	-0.226197	0.317347	-0.398928	0.524324	-0.537456	0.176657	TRAIN		0.037457	-0.687268	0.251586	-0.645389	-0.772803	0.229036	-0.350695	0.122202
276	0.812953	-0.0797387	-0.230178	-0.226197	0.317347	-0.398928	0.524324	-0.537456	0.17194	TRAIN		0.116031	-0.266488	0.341209	-0.118702	-0.111779	0.318966	0.0779043	0.2373
253	0.312272	-0.790517	-0.230178	-0.226197	0.317347	-0.398928	-0.567002	2.13992	0.156321	TRAIN		-0.0143261	0.405102	0.184096	-0.645389	-0.585386	0.0347595	-0.350695	-0.0425483
273	0.390931	-0.790517	-0.230178	1.88018	0.317347	-0.398928	0.524324	2.14146	0.149701	TRAIN		0.479821	0.405731	0.783301	-0.645389	-0.585278	0.618695	-0.350695	0.759748
265	0.420833	-0.790517	-0.230178	0.475928	0.317347	-0.398928	1.61565	-0.537456	0.149481	TRAIN		0.175107	-0.687268	0.559895	-0.645389	-0.772803	0.482709	-0.350695	0.443155
235	-1.45547	-0.0797387	-0.230178	-0.226197	0.317347	-0.398928	-0.567002	-0.537456	0.144326	TRAIN		-0.466869	-0.266488	-0.532889	-0.118702	-0.111779	-0.48319	0.0779043	-0.756324
680	1.37787	-0.790517	-0.230178	-0.928322	0.317347	-0.398928	-0.567002	-0.537456	0.143078	TRAIN		0.101191	-0.687268	0.17298	-0.645389	-0.772803	0.205852	-0.350695	0.0962453
267	1.01587	-0.0797387	-0.230178	0.475928	0.317347	-0.398928	0.524324	-0.537456	0.140272	TRAIN		0.325254	-0.266488	0.521928	-0.118702	-0.111779	0.519548	0.0779043	0.52333
210	-0.805721	-0.790517	-0.230178	-0.226197	0.317347	-0.398928	-0.567002	-0.537456	0.139403	TRAIN		-0.300532	-0.687268	-0.343161	-0.645389	-0.772803	-0.292812	-0.350695	-0.512666
224	0.171271	-0.790517	-0.230178	0.475928	0.317347	-0.398928	1.61565	-0.537456	0.138767	TRAIN		0.111219	-0.687268	0.487023	-0.645389	-0.772803	0.409588	-0.350695	0.349569
272	0.700228	-0.790517	-0.230178	-0.928322	0.317347	-0.398928	-0.567002	-0.537456	0.127531	TRAIN		-0.0722853	-0.687268	-0.0248914	-0.645389	-0.772803	0.00730361	-0.350695	-0.15787
681	-0.21052	0.444372	-0.230178	-0.226197	-3.21548	8.00202	-0.567002	1.83006	0.126483	TRAIN		-0.292504	1.00973	-0.883796	0.269664	0.54137	-0.955531	-1.00859	0.646017
247	-0.291743	-0.0797387	-0.230178	-0.928322	0.317347	-0.398928	-0.567002	1.78691	0.117004	TRAIN		-0.32623	0.681853	-0.14022	-0.118702	0.0509266	-0.283344	0.0779043	-0.485696
285	0.282504	-0.790517	-0.230178	-0.226197	0.317347	-0.398928	0.524324	2.2589	0.109402	TRAIN		-0.0197642	0.453645	0.396045	-0.645389	-0.577058	0.163544	-0.350695	0.0915129
689	0.48791	3.28918	-0.230178	-0.928322	0.317347	0.301151	-0.567002	-0.537456	0.089385	TRAIN		-0.0930351	1.72791	-0.0840882	2.37767	3.02132	-0.0437045	2.10936	-0.163281
683	0.613414	-0.790517	3.15599	-0.226197	0.317347	-0.398928	0.524324	-0.537456	0.0857898	TRAIN		1.13159	-0.687268	0.282944	0.231627	-0.772803	0.565256	-0.350695	0.399505
675	-0.0871087	0.63104	-0.230178	-0.226197	0.317347	-0.398928	-0.567002	-0.537456	0.0841722	TRAIN		-0.116568	0.154293	-0.133326	0.407984	0.549245	-0.082259	0.506504	-0.243186
678	0.00397163	-0.790517	-0.230178	0.475928	0.317347	-0.398928	1.61565	0.791756	0.0841617	TRAIN		0.0683903	-0.14495	0.537862	-0.645389	-0.679758	0.360569	-0.350695	0.312087
682	0.422226	-0.790517	-0.230178	0.475928	0.317347	-0.398928	-0.567002	1.41323	0.0831086	TRAIN		0.171098	0.108611	0.283169	-0.645389	-0.636255	0.208103	-0.350695	0.194813
677	-0.142603	-0.790517	-0.230178	1.88018	0.317347	-0.398928	-0.567002	-0.537456	0.0806248	TRAIN		0.341054	-0.687268	0.214872	-0.645389	-0.772803	0.324862	-0.350695	0.365809
287	0.928825	-0.790517	-0.230178	-0.226197	0.317347	-0.398928	0.524324	2.13815	0.0799553	TRAIN		0.145694	0.404378	0.575714	-0.645389	-0.585511	0.352917	-0.350695	0.331589
229	0.429377	-0.790517	-0.230178	-0.928322	0.317347	-0.398928	-0.567002	-0.537456	0.0797149	TRAIN		-0.141623	-0.687268	-0.10398	-0.645389	-0.772803	-0.0720559	-0.350695	-0.25944
258	-0.507507	-0.0797387	-0.230178	-0.226197	0.317347	-0.398928	-0.567002	-0.537456	0.078335	TRAIN		-0.22419	-0.266488	-0.256083	-0.118702	-0.111779	-0.205436	0.0779043	-0.400836
275	0.244421	-0.790517	-0.230178	0.475928	0.317347	-0.398928	1.61565	0.848882	0.0739197	TRAIN		0.129945	-0.121642	0.612358	-0.645389	-0.675759	0.43102	-0.350695	0.40334
274	1.32355	-0.790517	-0.230178	-0.928322	0.317347	-0.398928	-0.567002	3.49965	0.0723615	TRAIN		0.0872841	0.959873	0.459901	-0.645389	-0.490205	0.189936	-0.350695	0.152579
280	0.164646	-0.790517	-0.230178	0.475928	0.317347	-0.398928	-0.567002	-0.537456	0.0665858	TRAIN		0.105158	-0.687268	0.061654	-0.645389	-0.772803	0.132632	-0.350695	0.0611573
256	-0.399355	0.63104	-0.230178	-0.226197	0.317347	-0.398928	-0.567002	-0.537456	0.0630384	TRAIN		-0.196503	0.154293	-0.224502	0.407984	0.549245	-0.173747	0.506504	-0.360279
236	-0.774305	-0.143108	-0.230178	-0.226197	0.317347	-0.398928	-0.567002	-0.537456	0.055654	TRAIN		-0.29249	-0.304002	-0.333987	-0.165659	-0.170713	-0.283608	0.0396924	-0.500885
262	0.301642	-0.0797387	2.15087	-0.928322	0.317347	-0.398928	-0.567002	-0.537456	0.0525991	TRAIN		0.575705	-0.266488	-0.141279	0.497988	-0.111779	0.104812	0.0779043	-0.140667
662	-1.22192	0.893943	-0.230178	-0.226197	0.317347	-0.398928	0.524324	-0.537456	0.0525102	TRAIN		-0.404898	0.309932	-0.252975	0.602796	0.793745	-0.277253	0.665035	-0.525778
684	0.608215	0.893943	-0.230178	0.475928	0.317347	-0.398928	1.61565	-0.537456	0.0493136	TRAIN		0.223077	0.309932	0.614611	0.602796	0.793745	0.537612	0.665035	0.513423
685	0.532401	0.893943	-0.230178	-0.226197	0.317347	-0.398928	0.524324	-0.537456	0.036262	TRAIN		0.0442096	0.309932	0.259288	0.602796	0.793745	0.236764	0.665035	0.132094
687	0.860902	-0.0845739	-0.230178	-0.928322	0.317347	-0.398928	-0.567002	1.63387	0.0344826	TRAIN		-0.0311527	0.616549	0.184875	-0.122285	0.0357168	0.0543811	0.0749887	-0.0563623
260	-0.251525	0.893943	-0.230178	-0.928322	0.317347	-0.398928	-0.567002	-0.537456	0.0241101	TRAIN		-0.315934	0.309932	-0.302803	0.602796	0.793745	-0.27156	0.665035	-0.514778
679	-0.881231	-0.0797387	-0.230178	-0.928322	0.317347	1.00123	-0.567002	-0.537456	0.0175403	TRAIN		-0.409931	-0.266488	-0.481077	-0.118702	-0.111779	-0.433662	0.0779043	-0.602501
298	0.609333	-0.264062	-0.230178	0.475928	0.317347	1.00123	-0.567002	-0.537456	0.0119218	TRAIN		0.286205	-0.375607	0.197103	-0.255286	-0.2832	0.285328	-0.0332426	0.376332
297	0.603585	0.893943	-0.230178	0.475928	0.317347	-0.398928	1.61565	-0.537456	0.0108984	TRAIN		0.221891	0.309932	0.613259	0.602796	0.793745	0.536256	0.665035	0.511687
283	-0.0509765	-0.0797387	-0.230178	0.475928	0.317347	-0.398928	1.61565	1.11374	0.00482756	TRAIN		0.0543236	0.4072	0.545966	-0.118702	0.00380476	0.344469	0.0779043	0.297599
295	1.06246	0.893943	-0.230178	-0.928322	0.317347	0.301151	-0.567002	-0.537456	-0.00231586	TRAIN		0.0540498	0.309932	0.0836806	0.602796	0.793745	0.124639	0.665035	0.052175
294	0.278421	-0.790517	-0.230178	-0.226197	0.317347	-0.398928	-0.567002	2.2225	-0.0188847	TRAIN		-0.0229921	0.438796	0.180405	-0.645389	-0.579606	0.024841	-0.350695	-0.0536735
296	0.311206	-0.790517	-0.230178	-0.226197	0.317347	-0.398928	0.524324	-0.537456	-0.021928	TRAIN		-0.0124163	-0.687268	0.194699	-0.645389	-0.772803	0.171954	-0.350695	0.0491456
289	0.197581	0.893943	-0.230178	0.475928	0.317347	-0.398928	1.61565	-0.537456	-0.0252505	TRAIN		0.117954	0.309932	0.494705	0.602796	0.793745	0.417296	0.665035	0.359435
306	0.641838	-0.790517	-0.230178	1.88018	0.317347	-0.398928	3.7983	-0.537456	-0.0274306	TRAIN		0.550601	-0.687268	1.2908	-0.645389	-0.772803	1.10473	-0.350695	1.23183
282	-1.56479	-0.0797387	-0.230178	-0.226197	0.317347	0.301151	-0.567002	1.56897	-0.0297262	TRAIN		-0.461251	0.592933	-0.404028	-0.118702	0.0356706	-0.50402	0.0779043	-0.683088
291	-0.382593	-0.790517	-0.230178	1.88018	0.317347	-0.398928	-0.567002	-0.537456	-0.04423	TRAIN		0.279616	-0.687268	0.144795	-0.645389	-0.772803	0.254545	-0.350695	0.275813
308	0.54716	-0.790517	-0.230178	-0.928322	0.317347	-0.398928	-0.567002	1.89557	-0.0449834	TRAIN		-0.111471	0.305407	0.11289	-0.645389	-0.602491	-0.0375455	-0.350695	-0.169043
277	0.37547	0.893943	-0.230178	-0.226197	0.317347	-0.398928	-0.567002	-0.537456	-0.0482877	TRAIN		0.0018527	0.309932	0.00174693	0.602796	0.793745	0.0532767	0.665035	-0.0697191
292	-0.0901667	-0.790517	-0.230178	-0.226197	0.317347	-0.398928	-0.567002	2.10871	-0.0485907	TRAIN		-0.11735	0.392368	0.0642434	-0.645389	-0.587571	-0.083155	-0.350695	-0.194056
311	0.255751	0.507741	-0.230178	-0.226197	0.317347	-0.398928	-0.567002	1.66648	-0.0566932	TRAIN		-0.0287955	0.980507	0.132084	0.31662	0.588853	0.0181989	0.432155	-0.0727391
284	0.112273	-0.790517	-0.230178	0.475928	0.317347	-0.398928	1.61565	-0.537456	-0.0612085	TRAIN		0.0961154	-0.687268	0.469795	-0.645389	-0.772803	0.392301	-0.350695	0.327445
266	0.00923092	0.893943	-0.230178	0.475928	0.317347	-0.398928	1.61565	-0.537456	-0.0647242	TRAIN		0.0697367	0.309932	0.439707	0.602796	0.793745	0.36211	0.665035	0.288804
317	0.511363	-0.790517	-0.230178	1.88018	0.317347	1.00123	0.524324	2.01338	-0.0677896	TRAIN		0.577859	0.353471	0.814461	-0.645389	-0.594245	0.676384	-0.350695	0.950893
688	-0.39532	-0.0797387	-0.230178	-0.226197	0.317347	-0.398928	-0.567002	2.31171	-0.074253	TRAIN		-0.19547	0.895971	-0.0096367	-0.118702	0.0876624	-0.172565	0.0779043	-0.304631
316	0.257723	-0.790517	-0.230178	1.17805	0.317347	-0.398928	-0.567002	2.5556	-0.0791436	TRAIN		0.286261	0.574699	0.442279	-0.645389	-0.556289	0.301031	-0.350695	0.364764
309	0.0113024	-0.0797387	-0.230178	0.475928	0.317347	-0.398928	0.524324	1.14693	-0.080169	TRAIN		0.0680843	0.420742	0.354924	-0.118702	0.00612806	0.22521	0.0779043	0.17862
661	-0.796555	-0.790517	0.214343	-0.928322	0.317347	-0.398928	-0.567002	-0.537456	-0.0936437	TRAIN		-0.315438	-0.687268	-0.461952	-0.530258	-0.772803	-0.391247	-0.350695	-0.688047
335	-0.381026	1.21508	4.19177	-0.226197	-3.23161	2.40139	-0.567002	-0.537456	-0.100171	TRAIN		0.785431	0.500044	-1.13777	1.98604	1.0924	-0.701558	-0.550255	0.252965
307	0.52325	-0.0797387	-0.230178	0.475928	0.317347	-0.398928	1.61565	-0.537456	-0.101424	TRAIN		0.201326	-0.266488	0.589801	-0.118702	-0.111779	0.512717	0.0779043	0.481561
301	0.0504261	0.893943	-0.230178	-0.226197	0.317347	-0.398928	0.524324	-0.537456	-0.10839	TRAIN		-0.079176	0.309932	0.118551	0.602796	0.793745	0.0955458	0.665035	-0.048647
299	0.23876	-0.790517	-0.230178	-0.226197	0.317347	-0.398928	-0.567002	2.54582	-0.116096	TRAIN		-0.0331452	0.57071	0.193074	-0.645389	-0.556973	0.0132205	-0.350695	-0.0624031
300	-0.646693	-0.0797387	-0.230178	-0.928322	0.317347	-0.398928	-0.567002	2.31171	-0.117776	TRAIN		-0.417097	0.895971	-0.204505	-0.118702	0.0876624	-0.387345	0.0779043	-0.608832
330	1.99446	-0.790517	-0.230178	2.5823	0.317347	-0.398928	1.61565	-0.537456	-0.122376	TRAIN		1.04978	-0.687268	1.3838	-0.645389	-0.772803	1.36716	-0.350695	1.66307
321	0.440227	-0.0797387	-0.230178	-0.226197	0.317347	-0.398928	-0.567002	-0.537456	-0.123219	TRAIN		0.0184303	-0.266488	0.0206558	-0.118702	-0.111779	0.0722503	0.0779043	-0.0454354
315	-0.611761	-0.790517	-0.230178	0.475928	0.317347	1.70131	0.524324	1.8247	-0.126272	TRAIN		0.0093915	0.276493	0.232223	-0.645389	-0.607452	0.0762559	-0.350695	0.180474
341	-0.432544	0.56767	-0.230178	0.475928	-3.27514	0.301151	-0.567002	-0.537456	-0.129519	TRAIN		-0.570955	0.116778	-1.05116	0.361028	0.490311	-1.01908	-0.957928	-0.0885807
304	0.140574	-0.790517	-0.230178	-0.226197	0.317347	-0.398928	-0.567002	2.6818	-0.138448	TRAIN		-0.0582809	0.626188	0.174601	-0.645389	-0.547455	-0.0155482	-0.350695	-0.0966395
696	0.48095	-0.0797387	-0.230178	-0.928322	0.317347	-0.398928	-0.567002	-0.537456	-0.139931	TRAIN		-0.128421	-0.266488	-0.0889206	-0.118702	-0.111779	-0.0569449	0.0779043	-0.2401
290	-0.102849	0.507741	-0.230178	0.475928	0.317347	-0.398928	1.61565	-0.537456	-0.147998	TRAIN		0.0410441	0.0813007	0.40698	0.31662	0.434578	0.32927	0.432155	0.246774
692	0.522235	-0.790517	-0.230178	-0.226197	0.317347	-0.398928	-0.567002	2.58199	-0.148453	TRAIN		0.0394245	0.585464	0.27856	-0.645389	-0.554442	0.0962787	-0.350695	0.0445871
310	-0.202925	0.63104	-0.230178	-0.226197	0.317347	-0.398928	-0.567002	-0.537456	-0.153069	TRAIN		-0.146216	0.154293	-0.167145	0.407984	0.549245	-0.116193	0.506504	-0.286617
318	-0.502382	-0.790517	-0.230178	0.475928	0.317347	0.301151	-0.567002	1.83264	-0.156943	TRAIN		-0.0319977	0.279732	0.0474394	-0.645389	-0.606896	-0.0516057	-0.350695	-0.0697381
340	0.446416	0.893943	-0.230178	-0.928322	0.317347	-0.398928	-0.567002	-0.537456	-0.158854	TRAIN		-0.137261	0.309932	-0.0990046	0.602796	0.793745	-0.0670635	0.665035	-0.25305
693	-0.167615	-0.790517	-0.230178	0.475928	0.317347	-0.398928	-0.567002	2.18999	-0.163899	TRAIN		0.0200987	0.425531	0.169192	-0.645389	-0.581881	0.0352796	-0.350695	-0.0116194
326	-0.167761	-0.790517	-0.230178	0.475928	0.317347	-0.398928	-0.567002	-0.537456	-0.170965	TRAIN		0.0200613	-0.687268	-0.0354092	-0.645389	-0.772803	0.0352368	-0.350695	-0.0634957
686	0.185575	0.893943	-0.230178	-0.928322	0.317347	-0.398928	-0.567002	-0.537456	-0.172014	TRAIN		-0.204037	0.309932	-0.17517	0.602796	0.793745	-0.14349	0.665035	-0.350865
695	0.560861	-0.790517	-0.230178	-0.928322	0.317347	-0.398928	-0.567002	-0.537456	-0.178616	TRAIN		-0.107963	-0.687268	-0.0655865	-0.645389	-0.772803	-0.0335309	-0.350695	-0.210133
328	1.04176	-0.790517	-0.230178	0.475928	0.317347	1.00123	1.61565	-0.537456	-0.185535	TRAIN		0.401272	-0.687268	0.746807	-0.645389	-0.772803	0.687044	-0.350695	0.824419
312	0.203503	-0.0797387	-0.230178	0.475928	0.317347	-0.398928	1.61565	-0.537456	-0.186936	TRAIN		0.11947	-0.266488	0.496435	-0.118702	-0.111779	0.419032	0.0779043	0.361656
320	1.19241	-0.790517	-0.230178	-0.928322	0.317347	-0.398928	-0.567002	-0.537456	-0.189167	TRAIN		0.053713	-0.687268	0.118825	-0.645389	-0.772803	0.151513	-0.350695	0.0266976
271	-0.500909	-0.790517	-0.230178	0.475928	0.317347	-0.398928	0.524324	-0.537456	-0.190274	TRAIN		-0.0630418	-0.687268	0.079029	-0.645389	-0.772803	0.0751317	-0.350695	-0.0454622
332	0.279719	-0.790517	1.98247	0.475928	0.317347	-0.398928	1.61565	1.35023	-0.194316	TRAIN		0.835966	0.0829065	0.660266	-0.0723131	-0.640665	0.640501	-0.350695	0.580988
339	-0.119245	-0.0797387	-0.230178	-0.226197	0.317347	-0.398928	0.524324	0.738917	-0.208157	TRAIN		-0.122612	0.254273	0.164735	-0.118702	-0.0224328	0.0458321	0.0779043	-0.0880226
324	-0.563628	-0.0797387	-0.230178	-0.226197	0.317347	0.301151	-0.567002	-0.537456	-0.215293	TRAIN		-0.204953	-0.266488	-0.269669	-0.118702	-0.111779	-0.210678	0.0779043	-0.347672
347	-0.236205	2.3155	-0.230178	-0.226197	0.317347	-0.398928	-0.567002	-0.537456	-0.215831	TRAIN		-0.154736	1.15149	-0.176862	1.65617	2.11579	-0.125944	1.52223	-0.299097
322	0.278141	-0.790517	-0.230178	1.88018	0.317347	-0.398928	-0.567002	-0.537456	-0.223556	TRAIN		0.448764	-0.687268	0.33773	-0.645389	-0.772803	0.44814	-0.350695	0.523588
338	-0.310394	0.63104	-0.230178	-0.226197	0.317347	-0.398928	-0.567002	-0.537456	-0.236649	TRAIN		-0.173729	0.154293	-0.198525	0.407984	0.549245	-0.147682	0.506504	-0.326918
313	-0.77026	-0.790517	-0.230178	-0.928322	0.317347	-0.398928	-0.567002	-0.537456	-0.243963	TRAIN		-0.44873	-0.687268	-0.454274	-0.645389	-0.772803	-0.42355	-0.350695	-0.709303
697	-0.855227	-0.790517	-0.230178	-0.928322	0.317347	-0.398928	-0.567002	-0.537456	-0.247076	TRAIN		-0.470482	-0.687268	-0.479084	-0.645389	-0.772803	-0.448445	-0.350695	-0.741166
700	0.044751	-0.790517	-0.230178	-0.226197	0.317347	-0.398928	-0.567002	2.07078	-0.247361	TRAIN		-0.0828115	0.376892	0.100795	-0.645389	-0.590226	-0.0436241	-0.350695	-0.144182
329	-1.39418	-0.0797387	-0.230178	-0.226197	0.317347	1.70131	-0.567002	-0.537456	-0.254395	TRAIN		-0.350367	-0.266488	-0.506591	-0.118702	-0.111779	-0.431628	0.0779043	-0.510714
279	-1.17871	-0.790517	-0.230178	-0.928322	0.317347	-0.398928	-0.567002	-0.537456	-0.258745	TRAIN		-0.553293	-0.687268	-0.573541	-0.645389	-0.772803	-0.543225	-0.350695	-0.862471
314	-0.700944	-0.790517	-0.230178	1.17805	0.317347	-0.398928	-0.567002	2.72103	-0.263052	TRAIN		0.0408426	0.642195	0.174756	-0.645389	-0.544709	0.0201415	-0.350695	0.00840754
358	2.00444	-0.790517	-0.230178	2.5823	0.317347	-0.398928	3.7983	-0.537456	-0.276971	TRAIN		1.0567	-0.687268	1.81014	-0.645389	-0.772803	1.6451	-0.350695	1.95274
699	0.144235	0.63104	-0.230178	-0.928322	0.317347	-0.398928	-0.567002	-0.537456	-0.284556	TRAIN		-0.21462	0.154293	-0.187241	0.407984	0.549245	-0.155602	0.506504	-0.366368
344	-0.494751	2.1922	-0.230178	1.17805	0.317347	-0.398928	1.61565	-0.537456	-0.297247	TRAIN		0.0979934	1.0785	0.414012	1.56481	2.00113	0.35557	1.44788	0.309746
351	0.582654	-0.0797387	-0.230178	-0.928322	0.317347	0.301151	-0.567002	-0.537456	-0.302512	TRAIN		-0.0687805	-0.266488	-0.0564227	-0.118702	-0.111779	-0.0159444	0.0779043	-0.127752
355	-0.108198	1.60472	2.64833	0.475928	0.317347	-0.398928	1.61565	-0.537456	-0.324733	TRAIN		0.946405	0.730713	0.405418	1.87502	1.45477	0.586769	1.09363	0.446264
293	-0.958348	-0.790517	-0.230178	-0.226197	0.317347	-0.398928	-0.567002	-0.537456	-0.331401	TRAIN		-0.339605	-0.687268	-0.387728	-0.645389	-0.772803	-0.337532	-0.350695	-0.569901
408	0.583651	-0.0797387	-0.230178	-0.928322	0.317347	2.40139	-0.567002	-0.537456	-0.336235	TRAIN		0.032286	-0.266488	-0.0477308	-0.118702	-0.111779	0.0179514	0.0779043	0.0952466
345	-1.5749	-0.0797387	-0.230178	0.475928	0.317347	-0.398928	-0.567002	-0.537456	-0.342307	TRAIN		-0.340167	-0.266488	-0.446294	-0.118702	-0.111779	-0.377055	0.0779043	-0.591173
323	-0.184727	0.893943	-0.230178	-0.928322	0.317347	-0.398928	-0.567002	-0.537456	-0.342978	TRAIN		-0.298834	0.309932	-0.283298	0.602796	0.793745	-0.251988	0.665035	-0.489728
702	-0.308769	2.1922	-0.230178	0.475928	0.317347	-0.398928	1.61565	-0.537456	-0.379009	TRAIN		-0.0116713	1.0785	0.346851	1.56481	2.00113	0.268936	1.44788	0.169554
703	-0.690899	-0.790517	-0.230178	-0.928322	0.317347	-0.398928	-0.567002	1.61921	-0.391109	TRAIN		-0.428414	0.192654	-0.26935	-0.645389	-0.621836	-0.400297	-0.350695	-0.638566
707	0.344714	0.893943	-0.230178	-0.226197	0.317347	-0.398928	0.524324	-0.537456	-0.391554	TRAIN		-0.00383826	0.309932	0.204483	0.602796	0.793745	0.181772	0.665035	0.0617111
354	-0.0447105	-0.0797387	-0.230178	-0.928322	0.317347	-0.398928	-0.567002	-0.537456	-0.404065	TRAIN		-0.26299	-0.266488	-0.242414	-0.118702	-0.111779	-0.210963	0.0779043	-0.437222
362	-0.308583	0.63104	-0.230178	-0.928322	0.317347	-0.398928	-0.567002	-0.537456	-0.405473	TRAIN		-0.330541	0.154293	-0.319464	0.407984	0.549245	-0.288278	0.506504	-0.536175
701	-0.47146	-0.0797387	-0.230178	-0.226197	0.317347	-0.398928	0.524324	-0.537456	-0.411412	TRAIN		-0.212779	-0.266488	-0.0338395	-0.118702	-0.111779	-0.0573669	0.0779043	-0.244354
368	0.423676	0.893943	-0.230178	1.17805	0.317347	-0.398928	2.70698	-0.537456	-0.414241	TRAIN		0.335293	0.309932	0.89391	0.602796	0.793745	0.762177	0.665035	0.79712
705	0.283513	-0.790517	-0.230178	-0.226197	0.317347	-0.398928	-0.567002	2.63324	-0.414465	TRAIN		-0.0216883	0.606377	0.212698	-0.645389	-0.550854	0.0263332	-0.350695	-0.0439597
714	0.710692	0.893943	-0.230178	-0.226197	0.317347	1.00123	0.524324	-0.537456	-0.426145	TRAIN		0.15706	0.309932	0.316949	0.602796	0.793745	0.311406	0.665035	0.347369
370	-4.07271	-0.790517	-0.230178	0.475928	0.317347	-0.398928	-0.567002	-0.537456	-0.431435	TRAIN		-0.979606	-0.687268	-1.17566	-0.645389	-0.772803	-1.10891	-0.350695	-1.52785
381	0.262328	0.893943	-0.230178	-0.928322	0.317347	0.301151	-0.567002	-0.537456	-0.432747	TRAIN		-0.150784	0.309932	-0.149958	0.602796	0.793745	-0.1098	0.665035	-0.247874
394	0.00763606	-0.790517	-0.230178	-0.928322	0.317347	1.70131	-0.567002	-0.537456	-0.433081	TRAIN		-0.148778	-0.687268	-0.218727	-0.645389	-0.772803	-0.162022	-0.350695	-0.194967
244	-1.79352	-0.790517	-0.230178	-0.928322	0.317347	-0.398928	-0.567002	-0.537456	-0.445502	TRAIN		-0.710684	-0.687268	-0.753065	-0.645389	-0.772803	-0.723364	-0.350695	-1.09302
367	-0.34037	0.63104	-0.230178	-0.928322	0.317347	-0.398928	-0.567002	-0.537456	-0.449462	TRAIN		-0.338678	0.154293	-0.328746	0.407984	0.549245	-0.297592	0.506504	-0.548094
366	-0.298074	-0.0797387	-0.230178	-0.928322	0.317347	-0.398928	-0.567002	2.66169	-0.451267	TRAIN		-0.327851	1.03876	-0.0764596	-0.118702	0.112161	-0.285199	0.0779043	-0.47145
397	0.246383	-0.790517	-0.230178	-0.226197	-2.80557	8.00202	-0.567002	1.89375	-0.456549	TRAIN		-0.112001	0.304666	-0.638207	-0.645389	-0.602618	-0.708934	-1.59049	0.818566
371	-0.0866158	-0.790517	-0.230178	-0.226197	0.317347	-0.398928	0.524324	1.63193	-0.460855	TRAIN		-0.114259	0.197842	0.241239	-0.645389	-0.620946	0.0553925	-0.350695	-0.0588193
374	-1.13603	-0.790517	-0.230178	1.17805	0.317347	1.70131	-0.567002	-0.537456	-0.479465	TRAIN		0.030271	-0.687268	-0.188276	-0.645389	-0.772803	-0.073736	-0.350695	0.00596277
402	0.0980889	0.0234336	-0.230178	0.475928	0.317347	-0.398928	0.524324	-0.537456	-0.481263	TRAIN		0.0903017	-0.20541	0.253936	-0.0422517	-0.0158287	0.250638	0.140117	0.179162
389	-0.578802	-0.0797387	-0.230178	1.17805	0.317347	-0.398928	-0.567002	-0.537456	-0.483809	TRAIN		0.0721109	-0.266488	-0.0339654	-0.118702	-0.111779	0.0559291	0.0779043	-0.00770051
398	0.207444	0.63104	-0.230178	-0.928322	0.317347	-0.398928	-0.567002	-0.537456	-0.486874	TRAIN		-0.198438	0.154293	-0.168784	0.407984	0.549245	-0.137082	0.506504	-0.342664
708	-0.49907	-0.0797387	-0.230178	-0.226197	0.317347	-0.398928	-0.567002	1.81068	-0.490929	TRAIN		-0.22203	0.691551	-0.0775088	-0.118702	0.0525905	-0.202964	0.0779043	-0.353057
713	0.241907	0.893943	-0.230178	-0.226197	0.317347	-0.398928	0.524324	-0.537456	-0.491576	TRAIN		-0.0301568	0.309932	0.174464	0.602796	0.793745	0.15165	0.665035	0.0231585
399	0.706854	0.893943	-0.230178	0.475928	0.317347	-0.398928	1.61565	-0.537456	-0.49472	TRAIN		0.248328	0.309932	0.643413	0.602796	0.793745	0.566513	0.665035	0.550413
386	-1.11757	-0.0797387	-0.230178	-0.226197	-2.59257	-0.398928	-0.567002	-0.537456	-0.501054	TRAIN		-0.831403	-0.266488	-1.19662	-0.118702	-0.111779	-1.18441	-1.07733	-0.629609
706	-0.566105	-0.790517	-0.230178	-0.928322	0.317347	-0.398928	-0.567002	2.5097	-0.503363	TRAIN		-0.396467	0.555971	-0.166124	-0.645389	-0.559502	-0.363732	-0.350695	-0.574849
413	1.23057	-0.790517	-0.230178	-0.928322	0.317347	-0.398928	-0.567002	1.74543	-0.515172	TRAIN		0.0634819	0.24415	0.301185	-0.645389	-0.613001	0.162693	-0.350695	0.0843824
379	-0.281093	0.63104	-0.230178	-0.928322	0.317347	-0.398928	-0.567002	-0.537456	-0.52118	TRAIN		-0.323504	0.154293	-0.311437	0.407984	0.549245	-0.280224	0.506504	-0.525866
377	0.273516	-0.0797387	-0.230178	-0.928322	0.317347	-0.398928	-0.567002	-0.537456	-0.531495	TRAIN		-0.181524	-0.266488	-0.149491	-0.118702	-0.111779	-0.117723	0.0779043	-0.317887
395	0.0302778	-0.790517	-0.230178	0.475928	0.317347	-0.398928	1.61565	-0.537456	-0.533807	TRAIN		0.0751247	-0.687268	0.445853	-0.645389	-0.772803	0.368277	-0.350695	0.296697
373	-0.269945	-0.790517	-0.230178	-0.226197	0.317347	-0.398928	-0.567002	2.58556	-0.540271	TRAIN		-0.163374	0.586923	0.0475121	-0.645389	-0.554192	-0.13583	-0.350695	-0.252412
385	-0.828794	0.63104	-0.230178	-0.226197	0.317347	-0.398928	-0.567002	-0.537456	-0.54309	TRAIN		-0.306439	0.154293	-0.349898	0.407984	0.549245	-0.299573	0.506504	-0.521318
710	-0.528715	1.21852	-0.230178	-0.226197	0.317347	-0.398928	-0.567002	-0.537456	-0.552821	TRAIN		-0.229619	0.502082	-0.262275	0.843307	1.0956	-0.21165	0.860754	-0.408788
400	-0.351326	-0.790517	-0.230178	0.475928	0.317347	-0.398928	-0.567002	2.69028	-0.576402	TRAIN		-0.0269311	0.629649	0.15307	-0.645389	-0.546861	-0.0185475	-0.350695	-0.0710053
718	0.713609	-0.790517	-0.230178	0.475928	0.317347	0.301151	1.61565	2.07966	-0.578276	TRAIN		0.283661	0.380517	0.84447	-0.645389	-0.589604	0.579694	-0.350695	0.67688
383	-0.823742	-0.790517	-0.230178	-0.928322	0.317347	-0.398928	-0.567002	-0.537456	-0.590931	TRAIN		-0.462422	-0.687268	-0.469891	-0.645389	-0.772803	-0.43922	-0.350695	-0.729359
405	-0.19942	-0.790517	-0.230178	-0.226197	0.317347	-0.398928	-0.567002	1.79262	-0.593515	TRAIN		-0.145319	0.263401	0.00863429	-0.645389	-0.609698	-0.115166	-0.350695	-0.241032
704	-0.634643	-0.790517	-0.230178	-0.928322	0.317347	-0.398928	-0.567002	-0.537456	-0.600651	TRAIN		-0.414012	-0.687268	-0.414674	-0.645389	-0.772803	-0.383814	-0.350695	-0.658447
393	0.398965	-0.790517	-0.230178	-0.928322	0.317347	-0.398928	-0.567002	2.08071	-0.601454	TRAIN		-0.149409	0.380945	0.0835024	-0.645389	-0.589531	-0.0809666	-0.350695	-0.221099
412	0.0808639	-0.790517	-0.230178	-0.928322	0.317347	1.00123	-0.567002	1.68785	-0.60683	TRAIN		-0.163635	0.220658	-0.033247	-0.645389	-0.617031	-0.151768	-0.350695	-0.199434
372	-0.0940842	-0.790517	-0.230178	-0.928322	0.317347	-0.398928	-0.567002	-0.537456	-0.637921	TRAIN		-0.275629	-0.687268	-0.256831	-0.645389	-0.772803	-0.22543	-0.350695	-0.455737
407	-0.159305	-0.0797387	-0.230178	-0.928322	0.317347	-0.398928	-0.567002	1.39203	-0.658359	TRAIN		-0.292326	0.520744	-0.131163	-0.118702	0.0232852	-0.24454	0.0779043	-0.443535
717	-1.39055	-0.0797387	-0.230178	1.17805	0.317347	-0.398928	-0.567002	-0.537456	-0.663891	TRAIN		-0.135697	-0.266488	-0.270996	-0.118702	-0.111779	-0.181913	0.0779043	-0.312106
390	-0.235651	-0.790517	-0.230178	-0.928322	0.317347	-0.398928	-0.567002	-0.537456	-0.671177	TRAIN		-0.31187	-0.687268	-0.298168	-0.645389	-0.772803	-0.266909	-0.350695	-0.508825
415	-1.14669	0.893943	2.80698	-0.928322	0.317347	-0.398928	-0.567002	-0.537456	-0.678705	TRAIN		0.411608	0.309932	-0.564192	1.38942	0.793745	-0.2605	0.665035	-0.637864
378	-0.256259	-0.0797387	-0.230178	-0.928322	0.317347	-0.398928	-0.567002	-0.537456	-0.679739	TRAIN		-0.317146	-0.266488	-0.304186	-0.118702	-0.111779	-0.272947	0.0779043	-0.516553
432	1.22391	-0.0797387	-0.230178	0.475928	0.317347	-0.398928	1.61565	-0.537456	-0.688577	TRAIN		0.380695	-0.266488	0.794394	-0.118702	-0.111779	0.718012	0.0779043	0.74431
724	-1.02551	0.56767	-0.230178	0.475928	-3.21011	0.301151	-0.567002	-0.537456	-0.692443	TRAIN		-0.712674	0.116778	-1.20726	0.361028	0.490311	-1.17493	-0.932108	-0.310943
719	-1.44428	-0.790517	-0.230178	1.17805	0.317347	-0.398928	-0.567002	0.955018	-0.698806	TRAIN		-0.149452	-0.0783388	-0.17475	-0.645389	-0.66833	-0.197657	-0.350695	-0.303898
403	-2.56863	3.65758	-0.230178	-0.226197	0.317347	2.40139	-0.567002	-0.537456	-0.699178	TRAIN		-0.617423	1.946	-0.84673	2.65065	3.36393	-0.764541	2.33151	-0.876925
434	0.994586	0.893943	-0.230178	-0.226197	0.317347	1.00123	0.524324	-0.537456	-0.699675	TRAIN		0.229737	0.309932	0.399847	0.602796	0.793745	0.394587	0.665035	0.45383
404	-0.950649	-0.0797387	-0.230178	-0.226197	0.317347	-0.398928	-0.567002	-0.537456	-0.705509	TRAIN		-0.337634	-0.266488	-0.38548	-0.118702	-0.111779	-0.335276	0.0779043	-0.567014
416	-1.50908	-0.0797387	-0.230178	-0.226197	-2.36184	-0.398928	-0.567002	-0.537456	-0.717255	TRAIN		-0.895868	-0.266488	-1.25049	-0.118702	-0.111779	-1.23568	-0.985735	-0.776426
440	-1.3181	0.56767	-0.230178	-0.226197	-3.33811	1.00123	-0.567002	1.31494	-0.719528	TRAIN		-0.931091	0.872556	-1.30598	0.361028	0.619979	-1.42579	-0.982926	-0.521197
414	-0.632701	-0.143108	-0.230178	-0.226197	-2.45426	-0.398928	-0.567002	1.22884	-0.725252	TRAIN		-0.685838	0.416647	-0.886327	-0.165659	-0.0470718	-1.00431	-1.06063	-0.414224
429	0.76678	0.893943	-0.230178	-0.928322	0.317347	-0.398928	-0.567002	-0.537456	-0.726784	TRAIN		-0.055248	0.309932	-0.00545822	0.602796	0.793745	0.0268033	0.665035	-0.132913
425	-0.336859	-0.0797387	-0.230178	-0.226197	0.317347	-0.398928	-0.567002	1.19972	-0.729826	TRAIN		-0.180504	0.442279	-0.0759652	-0.118702	0.00982315	-0.155436	0.0779043	-0.303836
410	-0.271151	0.63104	-0.230178	-0.928322	0.317347	-0.398928	-0.567002	-0.537456	-0.730632	TRAIN		-0.320958	0.154293	-0.308534	0.407984	0.549245	-0.277311	0.506504	-0.522138
523	0.775018	0.63104	-0.230178	-0.928322	0.317347	-0.398928	-0.567002	-0.537456	-0.742336	TRAIN		-0.0531391	0.154293	-0.00305277	0.407984	0.549245	0.029217	0.506504	-0.129824
715	-1.59568	0.323418	-0.230178	0.475928	0.317347	-0.398928	-0.567002	-0.537456	-0.748416	TRAIN		-0.345485	-0.0278187	-0.452361	0.180037	0.263157	-0.383142	0.321008	-0.598964
712	-0.673186	0.507741	-0.230178	-0.928322	0.317347	-0.398928	-0.567002	-0.537456	-0.751546	TRAIN		-0.423879	0.0813007	-0.425928	0.31662	0.434578	-0.395107	0.432155	-0.672901
423	-0.788635	0.507741	-0.230178	-0.226197	0.317347	-0.398928	0.524324	1.34625	-0.762875	TRAIN		-0.293976	0.849854	0.0148235	0.31662	0.566437	-0.150299	0.432155	-0.327505
442	-3.75829	-0.790517	-0.230178	0.475928	0.317347	-0.398928	-0.567002	-0.537456	-0.775476	TRAIN		-0.899114	-0.687268	-1.08384	-0.645389	-0.772803	-1.01679	-0.350695	-1.40994
420	-0.520502	2.1922	-0.230178	0.475928	0.317347	-0.398928	1.61565	-0.537456	-0.780179	TRAIN		-0.0658748	1.0785	0.285025	1.56481	2.00113	0.206898	1.44788	0.0901543
733	-1.30792	1.21508	-0.230178	0.475928	-3.47938	1.00123	-0.567002	-0.537456	-0.781061	TRAIN		-0.793104	0.500044	-1.35748	0.840757	1.0924	-1.32053	-0.64862	-0.342638
422	-4.33302	-0.790517	-0.230178	0.475928	0.317347	2.40139	-0.567002	-0.537456	-0.781353	TRAIN		-0.911829	-0.687268	-1.24046	-0.645389	-0.772803	-1.14038	-0.350695	-1.32863
460	-0.0918851	-0.143108	-0.230178	0.475928	-3.28782	3.80155	0.524324	-0.537456	-0.783191	TRAIN		-0.31551	-0.304002	-0.729288	-0.165659	-0.170713	-0.729238	-1.39156	0.553172
462	-0.30026	-0.143108	-0.230178	-0.226197	-3.6575	-0.398928	-0.567002	-0.537456	-0.783485	TRAIN		-0.787236	-0.304002	-1.23698	-0.165659	-0.170713	-1.2378	-1.53832	-0.323118
522	1.48474	0.63104	6.28621	-0.226197	0.317347	-0.398928	0.524324	-0.537456	-0.792414	TRAIN		2.34067	0.154293	0.53737	2.09573	0.549245	1.10227	0.506504	0.945367
427	-0.360997	-0.0797387	-0.230178	-0.928322	0.317347	-0.398928	-0.567002	-0.537456	-0.796195	TRAIN		-0.343959	-0.266488	-0.334769	-0.118702	-0.111779	-0.303635	0.0779043	-0.55583
428	-0.707445	-0.0797387	-0.230178	-0.226197	0.317347	-0.398928	0.524324	1.20016	-0.801341	TRAIN		-0.273191	0.442461	0.0275744	-0.118702	0.00985443	-0.12651	0.0779043	-0.299834
490	-2.14828	2.5784	-0.230178	-0.226197	0.317347	-0.398928	-0.567002	-0.537456	-0.80534	TRAIN		-0.644228	1.30713	-0.735189	1.85098	2.36029	-0.686183	1.68076	-1.01613
450	0.560258	0.893943	-0.230178	-0.226197	0.317347	-0.398928	0.524324	-0.537456	-0.805497	TRAIN		0.0513411	0.309932	0.267422	0.602796	0.793745	0.244927	0.665035	0.14254
732	-1.32307	1.27845	-0.230178	-0.226197	-3.40832	1.00123	-0.567002	1.27955	-0.811577	TRAIN		-0.943244	1.2789	-1.32847	0.887714	1.27853	-1.44655	-0.582197	-0.523731
453	0.957798	-0.790517	-0.230178	-0.226197	0.317347	-0.398928	0.524324	-0.537456	-0.818328	TRAIN		0.153111	-0.687268	0.383504	-0.645389	-0.772803	0.361406	-0.350695	0.291617
509	-0.223328	-0.790517	-0.230178	0.475928	-2.88124	0.301151	0.524324	-0.537456	-0.81902	TRAIN		-0.454158	-0.687268	-0.675147	-0.645389	-0.772803	-0.711947	-1.62053	0.132839
720	-0.680504	1.60472	-0.230178	-0.928322	0.317347	1.00123	-0.567002	-0.537456	-0.825169	TRAIN		-0.358545	0.730713	-0.422464	1.12948	1.45477	-0.374848	1.09363	-0.527228
530	-0.699349	0.56767	-0.230178	-0.226197	-3.52995	1.70131	-0.567002	-0.537456	-0.829697	TRAIN		-0.768821	0.116778	-1.31169	0.361028	0.490311	-1.28605	-1.05908	-0.250151
426	-0.417046	0.507741	-0.230178	-0.928322	0.317347	-0.398928	-0.567002	-0.537456	-0.832168	TRAIN		-0.358307	0.0813007	-0.351135	0.31662	0.434578	-0.320058	0.432155	-0.576848
521	-0.999727	0.56767	-0.230178	-0.226197	-3.15893	1.70131	-0.567002	-0.537456	-0.837325	TRAIN		-0.788209	0.116778	-1.30219	0.361028	0.490311	-1.27203	-0.911789	-0.362793
430	-0.267384	0.893943	-0.230178	-0.226197	0.317347	-0.398928	0.524324	-0.537456	-0.845872	TRAIN		-0.160535	0.309932	0.0257506	0.602796	0.793745	0.00242734	0.665035	-0.167826
510	0.132883	0.63104	-0.230178	-0.226197	0.317347	1.00123	0.524324	-0.537456	-0.847534	TRAIN		0.00914042	0.154293	0.148229	0.407984	0.549245	0.142108	0.506504	0.130691
433	-1.63549	-0.790517	-0.230178	0.475928	-2.37265	-0.398928	-0.567002	-0.537456	-0.847988	TRAIN		-0.772626	-0.687268	-1.16876	-0.645389	-0.772803	-1.13456	-1.41863	-0.613892
536	1.41689	0.507741	-0.230178	-0.226197	0.317347	0.301151	0.524324	-0.537456	-0.848102	TRAIN		0.304242	0.0813007	0.520358	0.31662	0.434578	0.50712	0.432155	0.537984
458	0.324402	-0.790517	-0.230178	-0.226197	0.317347	-0.398928	-0.567002	-0.537456	-0.851763	TRAIN		-0.0112208	-0.687268	-0.013165	-0.645389	-0.772803	0.0383136	-0.350695	-0.0888697
418	-1.05327	-0.0797387	-0.230178	-0.928322	0.317347	-0.398928	-0.567002	-0.537456	-0.856043	TRAIN		-0.521181	-0.266488	-0.536913	-0.118702	-0.111779	-0.506472	0.0779043	-0.815433
531	-1.11772	-0.143108	-0.230178	0.475928	-3.32886	1.00123	-0.567002	0.896069	-0.864865	TRAIN		-0.721083	0.280876	-1.15499	-0.165659	-0.0703659	-1.22341	-1.40785	-0.244077
744	1.02482	-0.0845739	-0.230178	-0.928322	0.317347	0.301151	-0.567002	1.69343	-0.867305	TRAIN		0.0444128	0.640851	0.240005	-0.122285	0.0398863	0.113609	0.0749887	0.0804451
538	0.310113	-0.143108	-0.230178	1.17805	-3.15249	1.00123	1.61565	-0.537456	-0.869544	TRAIN		-0.166579	-0.304002	-0.254465	-0.165659	-0.170713	-0.340408	-1.33783	0.759987
437	-0.0151262	-0.790517	-0.230178	-0.226197	0.317347	-0.398928	-0.567002	-0.537456	-0.870732	TRAIN		-0.09814	-0.687268	-0.112307	-0.645389	-0.772803	-0.0611682	-0.350695	-0.216193
494	-0.60403	0.893943	-0.230178	-0.226197	-2.56683	1.00123	-0.567002	-0.537456	-0.87413	TRAIN		-0.628739	0.309932	-1.03432	0.602796	0.793745	-1.00446	-0.479983	-0.288615
484	-0.35557	-0.143108	-0.230178	-0.226197	-3.44149	1.00123	-0.567002	-0.537456	-0.877376	TRAIN		-0.700706	-0.304002	-1.19093	-0.165659	-0.170713	-1.1722	-1.45257	-0.195443
527	2.41314	-0.790517	-0.230178	0.475928	0.317347	-0.398928	0.524324	-0.537456	-0.887422	TRAIN		0.682954	-0.687268	0.92993	-0.645389	-0.772803	0.928947	-0.350695	1.0473
419	-1.72154	6.06675	-0.230178	-0.226197	-3.50846	-0.398928	-0.567002	-0.537456	-0.88816	TRAIN		-1.12798	3.37223	-1.61294	4.43584	5.60445	-1.61324	2.26539	-0.856097
507	0.466136	0.893943	-0.230178	-0.226197	0.317347	-0.398928	0.524324	-0.537456	-0.889172	TRAIN		0.0272456	0.309932	0.239938	0.602796	0.793745	0.217349	0.665035	0.107244
438	-0.357446	0.63104	-0.230178	-0.928322	0.317347	-0.398928	-0.567002	-0.537456	-0.889567	TRAIN		-0.34305	0.154293	-0.333732	0.407984	0.549245	-0.302595	0.506504	-0.554498
539	-0.942457	0.56767	-0.230178	-0.226197	-3.25417	0.301151	-0.567002	-0.537456	-0.895227	TRAIN		-0.855519	0.116778	-1.31603	0.361028	0.490311	-1.30384	-0.949602	-0.489734
435	-0.118059	0.893943	-0.230178	-0.928322	0.317347	-0.398928	-0.567002	-0.537456	-0.899482	TRAIN		-0.281767	0.309932	-0.263831	0.602796	0.793745	-0.232455	0.665035	-0.464728
511	-0.310272	2.5784	-0.230178	-0.928322	0.317347	2.40139	-0.567002	-0.537456	-0.899573	TRAIN		-0.196558	1.30713	-0.308756	1.85098	2.36029	-0.243968	1.68076	-0.239975
454	0.616397	-0.790517	-0.230178	-0.928322	0.317347	-0.398928	-0.567002	-0.537456	-0.90331	TRAIN		-0.093746	-0.687268	-0.04937	-0.645389	-0.772803	-0.0172589	-0.350695	-0.189307
558	-0.795273	1.27845	-0.230178	-0.226197	-3.27536	0.301151	-0.567002	-0.537456	-0.905355	TRAIN		-0.821124	0.537559	-1.2786	0.887714	1.15134	-1.26655	-0.529415	-0.43454
526	-1.11526	-0.790517	-0.230178	0.475928	0.317347	-0.398928	-0.567002	-0.537456	-0.913226	TRAIN		-0.222498	-0.687268	-0.312079	-0.645389	-0.772803	-0.24238	-0.350695	-0.418808
533	-0.346053	2.31067	-0.230178	-0.928322	0.317347	-0.398928	-0.567002	-0.537456	-0.914592	TRAIN		-0.340133	1.14863	-0.330406	1.65259	2.1113	-0.299257	1.51932	-0.550226
469	-0.290701	-0.790517	-0.230178	0.475928	0.317347	-0.398928	-0.567002	2.49922	-0.917192	TRAIN		-0.0114111	0.551694	0.156443	-0.645389	-0.560236	-0.000784318	-0.350695	-0.051901
545	-1.14091	2.25213	-0.230178	0.475928	-3.26742	0.301151	-0.567002	-0.537456	-0.918428	TRAIN		-0.751099	1.11398	-1.25598	1.60921	2.05686	-1.2245	0.0608693	-0.354217
524	-0.160994	0.56767	-0.230178	-0.226197	-4.18678	-0.398928	-0.567002	-0.537456	-0.919204	TRAIN		-0.833621	0.116778	-1.33498	0.361028	0.490311	-1.34254	-1.31985	-0.270893
534	0.0968483	2.1922	-0.230178	0.475928	0.317347	-0.398928	1.61565	-0.537456	-0.91999	TRAIN		0.0921667	1.0785	0.465291	1.56481	2.00113	0.387782	1.44788	0.32166
727	-0.68366	-0.0845739	-0.230178	-0.226197	0.317347	-0.398928	-0.567002	2.2489	-0.921299	TRAIN		-0.269285	0.867485	-0.0985422	-0.122285	0.0787695	-0.257049	0.0749887	-0.413952
473	-0.925675	1.60472	-0.230178	-0.928322	0.317347	1.00123	-0.567002	-0.537456	-0.923517	TRAIN		-0.421309	0.730713	-0.494055	1.12948	1.45477	-0.446684	1.09363	-0.619167
474	0.416006	2.5784	-0.230178	1.88018	0.317347	-0.398928	3.7983	-0.537456	-0.925179	TRAIN		0.492789	1.30713	1.22486	1.85098	2.36029	1.03856	1.68076	1.14714
513	-0.885839	2.5784	-0.230178	-0.928322	0.317347	2.40139	-0.567002	0.943602	-0.933352	TRAIN		-0.343903	1.9114	-0.365742	1.85098	2.46397	-0.412609	1.68076	-0.427672
543	-0.910519	4.26286	-0.230178	-0.928322	0.317347	4.50162	-0.567002	-0.537456	-0.939846	TRAIN		-0.24941	2.30433	-0.475627	3.09917	3.92684	-0.386236	2.69649	-0.242442
451	-0.814867	0.502906	-0.230178	-0.226197	0.317347	-0.398928	-0.567002	1.08547	-0.941203	TRAIN		-0.302874	0.74059	-0.224113	0.313038	0.543685	-0.295492	0.429239	-0.48526
515	0.427506	0.893943	-0.230178	-0.928322	0.317347	-0.398928	-0.567002	-0.537456	-0.945291	TRAIN		-0.142102	0.309932	-0.104526	0.602796	0.793745	-0.0726042	0.665035	-0.260141
528	-0.6751	1.60472	-0.230178	-0.928322	0.317347	-0.398928	-0.567002	-0.537456	-0.953343	TRAIN		-0.424369	0.730713	-0.426487	1.12948	1.45477	-0.395668	1.09363	-0.673618
446	-0.101182	-0.790517	-0.230178	-0.928322	0.317347	-0.398928	-0.567002	2.31556	-0.960731	TRAIN		-0.277446	0.476764	-0.0449267	-0.645389	-0.573091	-0.22751	-0.350695	-0.404192
512	-0.509083	0.893943	-0.230178	-0.928322	0.317347	1.00123	-0.567002	1.47291	-0.9639	TRAIN		-0.314661	1.13016	-0.221632	0.602796	0.934471	-0.324622	0.665035	-0.424748
547	-0.0531909	3.87666	-0.230178	0.475928	0.317347	-0.398928	1.61565	-0.537456	-0.965066	TRAIN		0.0537567	2.0757	0.42148	2.81299	3.56767	0.34382	2.46361	0.265396
728	-0.740859	-0.0797387	-0.230178	-0.226197	0.317347	-0.398928	-0.567002	1.72745	-0.96699	TRAIN		-0.283928	0.657593	-0.154353	-0.118702	0.0467642	-0.273808	0.0779043	-0.445309
751	0.393828	0.893943	-0.230178	-0.928322	0.317347	-0.398928	-0.567002	-0.537456	-0.970148	TRAIN		-0.150724	0.309932	-0.11436	0.602796	0.793745	-0.0824718	0.665035	-0.272771
568	0.465509	-0.143108	-0.230178	0.475928	-2.96338	1.00123	0.524324	-0.537456	-0.971782	TRAIN		-0.256943	-0.304002	-0.492726	-0.165659	-0.170713	-0.521504	-1.26275	0.465361
447	0.0421823	-0.0797387	-0.230178	-0.928322	0.317347	-0.398928	-0.567002	-0.537456	-0.972536	TRAIN		-0.240745	-0.266488	-0.217041	-0.118702	-0.111779	-0.185504	0.0779043	-0.404637
516	-0.48456	0.893943	2.83086	-0.928322	0.317347	0.301151	-0.567002	-0.537456	-0.973758	TRAIN		0.622241	0.309932	-0.368049	1.39561	0.793745	-0.0531443	0.665035	-0.313685
461	-0.0209999	0.893943	-0.230178	-0.226197	0.317347	-0.398928	0.524324	-0.537456	-0.974844	TRAIN		-0.0974611	0.309932	0.0976949	0.602796	0.793745	0.0746179	0.665035	-0.0754317
472	-0.966696	3.87666	-0.230178	0.475928	0.317347	-0.398928	0.524324	-0.537456	-0.977092	TRAIN		-0.182283	2.0757	-0.0569806	2.81299	3.56767	-0.0613438	2.46361	-0.220132
549	-0.925675	1.60472	-0.230178	-0.928322	0.317347	1.00123	-0.567002	-0.537456	-0.980548	TRAIN		-0.421309	0.730713	-0.494055	1.12948	1.45477	-0.446684	1.09363	-0.619167
540	-0.23367	-0.790517	-0.230178	1.17805	0.317347	-0.398928	-0.567002	1.6703	-0.982511	TRAIN		0.160465	0.213495	0.232394	-0.645389	-0.61826	0.157053	-0.350695	0.163671
730	0.140625	-0.790517	-0.230178	-0.928322	0.317347	-0.398928	-0.567002	2.02743	-0.984637	TRAIN		-0.215544	0.359205	0.00407085	-0.645389	-0.593261	-0.15666	-0.350695	-0.318989
565	-1.05461	2.25213	-0.230178	-0.226197	-3.31148	0.301151	-0.567002	-0.537456	-0.986752	TRAIN		-0.893112	1.11398	-1.36379	1.60921	2.05686	-1.35246	0.0433754	-0.531789
742	0.126155	0.893943	-0.230178	0.475928	0.317347	-0.398928	1.61565	-0.537456	-0.990104	TRAIN		0.0996693	0.309932	0.473849	0.602796	0.793745	0.396369	0.665035	0.332651
725	-0.663686	1.21852	-0.230178	-0.226197	0.317347	-0.398928	0.524324	-0.537456	-0.996183	TRAIN		-0.261989	0.502082	-0.0899694	0.843307	1.0956	-0.113689	0.860754	-0.316439
480	-0.707004	0.63104	-0.230178	-0.928322	0.317347	-0.398928	-0.567002	-0.537456	-0.996977	TRAIN		-0.432537	0.154293	-0.435803	0.407984	0.549245	-0.405015	0.506504	-0.685582
726	-1.06389	-0.790517	-0.230178	-0.928322	0.317347	-0.398928	-0.567002	-0.537456	-0.998568	TRAIN		-0.523898	-0.687268	-0.540013	-0.645389	-0.772803	-0.509582	-0.350695	-0.819413
556	-0.598912	-0.790517	-0.230178	0.475928	0.317347	1.00123	-0.567002	2.03591	-1.0005	TRAIN		-0.0231055	0.362664	0.0372978	-0.645389	-0.592667	-0.0686876	-0.350695	-0.0278663
483	-1.0416	-0.0797387	-0.230178	-0.928322	0.317347	-0.398928	-0.567002	-0.537456	-1.00571	TRAIN		-0.518193	-0.266488	-0.533505	-0.118702	-0.111779	-0.503051	0.0779043	-0.811055
444	-0.407612	0.893943	-0.230178	-0.928322	0.317347	-0.398928	-0.567002	-0.537456	-1.00575	TRAIN		-0.355892	0.309932	-0.348381	0.602796	0.793745	-0.317294	0.665035	-0.57331
471	-3.2638	0.0435596	-0.230178	-0.226197	0.317347	-0.398928	-0.567002	-0.537456	-1.00583	TRAIN		-0.929802	-0.193495	-1.06092	-0.0273383	0.00288848	-1.01303	0.152253	-1.43445
464	-0.267384	0.893943	-0.230178	-0.226197	0.317347	-0.398928	0.524324	-0.537456	-1.01042	TRAIN		-0.160535	0.309932	0.0257506	0.602796	0.793745	0.00242734	0.665035	-0.167826
542	-0.0847654	0.893943	-0.230178	1.17805	0.317347	-0.398928	1.61565	-0.537456	-1.01841	TRAIN		0.20295	0.309932	0.533728	0.602796	0.793745	0.475696	0.665035	0.463491
750	-0.409649	0.63104	-0.230178	-0.928322	0.317347	0.301151	-0.567002	1.67316	-1.03483	TRAIN		-0.32281	1.05622	-0.180379	0.407984	0.703988	-0.306689	0.506504	-0.457864
548	-0.891218	1.21368	-0.230178	-0.928322	0.317347	-0.398928	-0.567002	0.860442	-1.04298	TRAIN		-0.479696	1.06956	-0.384751	0.839724	1.18896	-0.45899	0.857839	-0.728103
498	-0.839495	-0.143108	-0.230178	-0.226197	-2.44372	-0.398928	-0.567002	1.21823	-1.04416	TRAIN		-0.737144	0.412316	-0.944747	-0.165659	-0.0478149	-1.062	-1.05645	-0.491973
574	0.815102	-0.790517	-0.230178	0.475928	0.317347	-0.398928	1.61565	1.28623	-1.04869	TRAIN		0.27604	0.056796	0.811798	-0.645389	-0.645145	0.59823	-0.350695	0.625656
470	-0.521642	-0.0797387	-0.230178	-0.928322	0.317347	-0.398928	-0.567002	-0.537456	-1.05118	TRAIN		-0.385084	-0.266488	-0.381677	-0.118702	-0.111779	-0.350704	0.0779043	-0.616071
729	-0.397696	0.893943	-0.230178	-0.928322	0.317347	-0.398928	-0.567002	-0.537456	-1.05358	TRAIN		-0.353354	0.309932	-0.345485	0.602796	0.793745	-0.314388	0.665035	-0.569592
500	-0.745938	0.893943	-0.230178	-0.928322	0.317347	-0.398928	-0.567002	-0.537456	-1.05753	TRAIN		-0.442504	0.309932	-0.447172	0.602796	0.793745	-0.416423	0.665035	-0.700183
552	-0.897849	0.752376	-0.230178	1.88018	-3.0661	-0.398928	0.524324	-0.537456	-1.0671	TRAIN		-0.374541	0.226124	-0.680405	0.497894	0.662087	-0.689365	-0.763559	0.225556
537	-1.50128	-0.264062	-0.230178	0.475928	0.317347	-0.398928	-0.567002	-0.537456	-1.09682	TRAIN		-0.32132	-0.375607	-0.424797	-0.255286	-0.2832	-0.355484	-0.0332426	-0.563565
481	-1.32527	2.51678	1.52938	-0.928322	0.317347	-0.398928	-0.567002	-0.537456	-1.09737	TRAIN		-0.0365521	1.27065	-0.616338	2.26104	2.30298	-0.427808	1.6436	-0.794264
502	-0.886012	2.5784	-0.230178	-0.928322	0.317347	-0.398928	-0.567002	-0.537456	-1.0975	TRAIN		-0.478363	1.30713	-0.488074	1.85098	2.36029	-0.457465	1.68076	-0.75271
503	-1.185	2.1922	-0.230178	-0.928322	0.317347	-0.398928	-0.567002	-0.537456	-1.09919	TRAIN		-0.554903	1.0785	-0.575378	1.56481	2.00113	-0.545068	1.44788	-0.86483
546	-1.25354	-0.790517	-0.230178	-0.226197	-2.59275	-0.398928	-0.567002	0.651061	-1.10058	TRAIN		-0.866239	-0.202353	-1.14723	-0.645389	-0.689607	-1.2243	-1.506	-0.658016
468	-1.14247	0.507741	-0.230178	-0.928322	0.317347	-0.398928	-0.567002	-0.537456	-1.10829	TRAIN		-0.544016	0.0813007	-0.562959	0.31662	0.434578	-0.532607	0.432155	-0.848881
508	-1.67386	0.507741	-0.230178	-0.226197	0.317347	-0.398928	0.524324	1.2162	-1.10898	TRAIN		-0.520594	0.796794	-0.253416	0.31662	0.557334	-0.409671	0.432155	-0.661935
555	0.0311245	0.893943	-0.230178	1.17805	0.317347	-0.398928	1.61565	-0.537456	-1.1105	TRAIN		0.232617	0.309932	0.567568	0.602796	0.793745	0.509652	0.665035	0.506949
748	-0.913817	0.444372	-0.230178	0.475928	-2.68764	-0.398928	0.524324	-0.537456	-1.11813	TRAIN		-0.634519	0.0437859	-0.828846	0.269664	0.375644	-0.872221	-0.799036	-0.200303
445	-1.19868	0.893943	-0.230178	-0.226197	0.317347	-0.398928	0.524324	-0.537456	-1.12055	TRAIN		-0.398948	0.309932	-0.246189	0.602796	0.793745	-0.270444	0.665035	-0.517063
496	-0.817677	-0.0797387	-0.230178	-0.928322	0.317347	-0.398928	-0.567002	-0.537456	-1.12248	TRAIN		-0.460869	-0.266488	-0.46812	-0.118702	-0.111779	-0.437443	0.0779043	-0.727085
576	-0.107826	0.0234336	-0.230178	-0.226197	0.317347	-0.398928	-0.567002	-0.537456	-1.13057	TRAIN		-0.121871	-0.20541	-0.139376	-0.0422517	-0.0158287	-0.0883293	0.140117	-0.250955
554	-1.41752	-0.143108	-0.230178	-0.226197	-2.59655	-0.398928	-0.567002	-0.537456	-1.131	TRAIN		-0.908806	-0.304002	-1.28525	-0.165659	-0.170713	-1.27339	-1.11712	-0.74209
563	-0.410168	-0.790517	-0.230178	0.475928	0.317347	-0.398928	-0.567002	1.74565	-1.13129	TRAIN		-0.0419946	0.24424	0.0650414	-0.645389	-0.612985	-0.0357882	-0.350695	-0.111019
740	-0.803466	0.893943	-0.230178	-0.928322	0.317347	-0.398928	-0.567002	-0.537456	-1.13216	TRAIN		-0.457231	0.309932	-0.46397	0.602796	0.793745	-0.433279	0.665035	-0.721755
745	-1.17378	-0.0797387	-0.230178	-0.226197	0.317347	-0.398928	-0.567002	-0.537456	-1.13506	TRAIN		-0.394756	-0.266488	-0.450635	-0.118702	-0.111779	-0.400654	0.0779043	-0.650689
738	-1.84606	1.21368	-0.230178	-0.226197	0.317347	-0.398928	0.524324	-0.537456	-1.13524	TRAIN		-0.564676	0.499219	-0.435222	0.839724	1.0911	-0.460124	0.857839	-0.759829
452	-1.03895	2.1922	-0.230178	-0.928322	0.317347	-0.398928	-0.567002	-0.537456	-1.13532	TRAIN		-0.517515	1.0785	-0.532731	1.56481	2.00113	-0.502275	1.44788	-0.810062
577	-0.631626	-0.790517	-0.230178	0.475928	-2.50593	-0.398928	0.524324	-0.537456	-1.13665	TRAIN		-0.534114	-0.687268	-0.69884	-0.645389	-0.772803	-0.739571	-1.47154	-0.094481
541	-1.50607	0.444372	-0.230178	0.475928	-2.50362	-0.398928	-0.567002	-0.537456	-1.14241	TRAIN		-0.759796	0.0437859	-1.16529	0.269664	0.375644	-1.13265	-0.725979	-0.565363
562	-1.48089	1.20885	-0.230178	-0.928322	0.317347	-0.398928	-0.567002	0.276262	-1.15153	TRAIN		-0.630652	0.828354	-0.60075	0.836141	1.14357	-0.631765	0.854923	-0.96033
721	-1.63576	0.893943	-0.230178	-0.928322	0.317347	-0.398928	-0.567002	-0.537456	-1.15999	TRAIN		-0.670299	0.309932	-0.707001	0.602796	0.793745	-0.677142	0.665035	-1.03387
561	-0.514112	-0.790517	-0.230178	-0.928322	0.317347	-0.398928	-0.567002	-0.537456	-1.16542	TRAIN		-0.383156	-0.687268	-0.379479	-0.645389	-0.772803	-0.348498	-0.350695	-0.613248
752	-1.55865	-0.0797387	-0.230178	-0.226197	-2.30539	-0.398928	-0.567002	-0.537456	-1.16583	TRAIN		-0.899806	-0.266488	-1.25017	-0.118702	-0.111779	-1.23467	-0.963321	-0.795014
431	-2.68785	-0.790517	-0.230178	-0.928322	0.317347	-0.398928	-0.567002	-0.537456	-1.18173	TRAIN		-0.939633	-0.687268	-1.01421	-0.645389	-0.772803	-0.985403	-0.350695	-1.4284
505	-1.22525	0.507741	-0.230178	-0.928322	0.317347	-0.398928	-0.567002	-0.537456	-1.18288	TRAIN		-0.565207	0.0813007	-0.587131	0.31662	0.434578	-0.556861	0.432155	-0.879924
567	-0.133382	0.893943	-0.230178	-0.928322	0.317347	-0.398928	-0.567002	-0.537456	-1.19314	TRAIN		-0.285689	0.309932	-0.268305	0.602796	0.793745	-0.236944	0.665035	-0.470474
755	-1.72732	0.56767	-0.230178	0.475928	-3.45661	2.40139	-0.567002	-0.527243	-1.20138	TRAIN		-0.829733	0.120946	-1.46761	0.361028	0.491026	-1.41475	-1.02997	-0.351302
529	-2.02371	0.621369	-0.230178	-0.928322	0.317347	-0.398928	-0.567002	-0.537456	-1.20978	TRAIN		-0.769613	0.148568	-0.820281	0.400819	0.540251	-0.79081	0.500672	-1.17935
756	-1.20093	0.56767	-0.230178	0.475928	-3.45811	1.00123	-0.567002	-0.537456	-1.21352	TRAIN		-0.762418	0.116778	-1.32066	0.361028	0.490311	-1.28333	-1.03056	-0.302518
443	-1.34257	0.893943	-0.230178	-0.928322	0.317347	-0.398928	-0.567002	-0.537456	-1.2141	TRAIN		-0.595243	0.309932	-0.62139	0.602796	0.793745	-0.591238	0.665035	-0.923921
754	-0.345659	-0.143108	-0.230178	-0.226197	-3.24565	-0.398928	-0.567002	-0.537456	-1.21924	TRAIN		-0.73502	-0.304002	-1.14233	-0.165659	-0.170713	-1.13784	-1.37482	-0.340142
572	-0.976756	0.502906	-0.230178	-0.928322	0.317347	-0.398928	-0.567002	1.01592	-1.22456	TRAIN		-0.501593	0.712218	-0.398067	0.313038	0.538817	-0.484053	0.429239	-0.757225
746	-1.93484	3.10426	-0.230178	-0.928322	0.317347	-0.398928	-0.567002	-0.537456	-1.22811	TRAIN		-0.746863	1.61844	-0.794332	2.24064	2.84934	-0.764772	1.99785	-1.14602
587	-2.10013	-0.0797387	-0.230178	0.475928	-3.94288	1.00123	-0.567002	-0.537456	-1.23201	TRAIN		-1.06775	-0.266488	-1.71024	-0.118702	-0.111779	-1.68011	-1.61341	-0.639717
544	-0.28508	0.893943	-0.230178	-0.928322	0.317347	-0.398928	-0.567002	-0.537456	-1.23724	TRAIN		-0.324524	0.309932	-0.312601	0.602796	0.793745	-0.281392	0.665035	-0.527361
479	-3.11594	-0.790517	-0.230178	-0.226197	0.317347	-0.398928	-0.567002	-0.537456	-1.24212	TRAIN		-0.891948	-0.687268	-1.01774	-0.645389	-0.772803	-0.969706	-0.350695	-1.379
485	-1.64139	0.0234336	-0.230178	-0.928322	0.317347	-0.398928	-0.567002	-0.537456	-1.24495	TRAIN		-0.671738	-0.20541	-0.708643	-0.0422517	-0.0158287	-0.678789	0.140117	-1.03598
749	-1.8759	0.893943	-0.230178	-0.928322	0.317347	-0.398928	-0.567002	-0.537456	-1.24658	TRAIN		-0.731773	0.309932	-0.77712	0.602796	0.793745	-0.747501	0.665035	-1.12392
575	-0.133382	0.893943	-0.230178	-0.928322	0.317347	-0.398928	-0.567002	-0.537456	-1.26359	TRAIN		-0.285689	0.309932	-0.268305	0.602796	0.793745	-0.236944	0.665035	-0.470474
585	-0.49537	1.60472	-0.230178	-0.928322	0.317347	-0.398928	-0.567002	-0.537456	-1.28839	TRAIN		-0.378358	0.730713	-0.374006	1.12948	1.45477	-0.343007	1.09363	-0.60622
753	-0.710908	-0.0797387	-0.230178	-0.928322	0.317347	-0.398928	-0.567002	1.79262	-1.30426	TRAIN		-0.433536	0.684182	-0.262188	-0.118702	0.0513261	-0.406159	0.0779043	-0.642775
582	-1.83926	0.444372	-0.230178	0.475928	-3.05783	-0.398928	-0.567002	-0.537456	-1.30704	TRAIN		-0.930995	0.0437859	-1.40778	0.269664	0.375644	-1.38269	-0.946001	-0.690309
583	-0.308117	-0.790517	-0.230178	-0.928322	0.317347	-0.398928	-0.567002	2.07596	-1.31014	TRAIN		-0.330422	0.379004	-0.123322	-0.645389	-0.589864	-0.288142	-0.350695	-0.486345
586	1.33858	-0.790517	-0.230178	-0.928322	0.317347	-0.398928	-0.567002	-0.537456	-1.3105	TRAIN		0.0911333	-0.687268	0.161508	-0.645389	-0.772803	0.194341	-0.350695	0.0815125
553	-2.02299	0.63104	-0.230178	-0.928322	0.317347	-0.398928	-0.567002	-0.537456	-1.3418	TRAIN		-0.76943	0.154293	-0.820073	0.407984	0.549245	-0.790601	0.506504	-1.17908
592	-0.962768	1.54135	-0.230178	-0.226197	-3.32139	0.301151	-0.567002	0.760154	-1.35197	TRAIN		-0.871137	1.22262	-1.24225	1.08253	1.48667	-1.32828	-0.389157	-0.472696
596	-0.196294	0.56767	-0.230178	-0.226197	-3.4429	0.301151	-0.567002	1.47511	-1.35469	TRAIN		-0.693753	0.937905	-0.996649	0.361028	0.631191	-1.13712	-1.02452	-0.171684
595	-0.303112	2.25213	-0.230178	-0.226197	-3.50021	0.301151	-0.567002	1.44802	-1.36294	TRAIN		-0.729981	1.92405	-1.04489	1.60921	2.19584	-1.18417	-0.0315472	-0.212255
593	-0.00634121	0.893943	-0.230178	-0.928322	0.317347	1.00123	-0.567002	1.7211	-1.37799	TRAIN		-0.18596	1.23142	-0.0562174	0.602796	0.951844	-0.177319	0.665035	-0.231505
580	-1.52066	2.39348	-0.230178	-0.226197	0.317347	-0.398928	-0.567002	-0.537456	-1.40424	TRAIN		-0.483557	1.19766	-0.551924	1.71395	2.18831	-0.50229	1.56926	-0.780769
436	-1.88899	0.507741	-0.230178	-0.928322	0.317347	-0.398928	-0.567002	-0.537456	-1.41049	TRAIN		-0.735124	0.0813007	-0.780942	0.31662	0.434578	-0.751337	0.432155	-1.12883
597	-0.852001	-0.143108	-0.230178	-0.226197	-3.26408	0.301151	-0.567002	0.821116	-1.42043	TRAIN		-0.833897	0.250295	-1.19032	-0.165659	-0.0756127	-1.28006	-1.38213	-0.43
598	0.691768	0.893943	-0.230178	-0.226197	0.317347	-0.398928	0.524324	-0.537456	-1.46888	TRAIN		0.0850075	0.309932	0.305823	0.602796	0.793745	0.283459	0.665035	0.191856
757	2.47259	0.893943	-0.230178	-0.928322	0.317347	-0.398928	-0.567002	-0.537456	-1.51498	TRAIN		0.381439	0.309932	0.492638	0.602796	0.793745	0.526605	0.665035	0.506765
601	0.406724	-0.790517	-0.230178	-0.928322	0.317347	-0.398928	-0.567002	-0.537456	-1.58559	TRAIN		-0.147422	-0.687268	-0.110595	-0.645389	-0.772803	-0.0786931	-0.350695	-0.267934
599	-0.148151	0.893943	-0.230178	-0.226197	0.317347	-0.398928	0.524324	1.71858	-1.60409	TRAIN		-0.130012	1.2304	0.22977	0.602796	0.951668	0.0373627	0.665035	-0.0802486
603	-0.914012	0.582687	-0.230178	-0.928322	0.317347	-0.398928	-0.567002	-0.537456	-1.6807	TRAIN		-0.485531	0.125669	-0.49625	0.372155	0.504277	-0.465669	0.477347	-0.76321
588	-1.74516	0.63104	-0.230178	-0.226197	0.317347	-0.398928	-0.567002	-0.537456	-1.68974	TRAIN		-0.541029	0.154293	-0.617477	0.407984	0.549245	-0.568068	0.506504	-0.864955
602	-0.607033	0.582687	-0.230178	-0.928322	0.317347	-0.398928	-0.567002	-0.537456	-1.69702	TRAIN		-0.406944	0.125669	-0.406612	0.372155	0.504277	-0.375724	0.477347	-0.648093
606	0.653254	-0.790517	-0.230178	-0.226197	0.317347	-0.398928	0.524324	1.37999	-1.75331	TRAIN		0.0751479	0.0950515	0.438386	-0.645389	-0.638581	0.272174	-0.350695	0.213845
589	-1.83209	-0.128091	-0.230178	-0.928322	0.317347	-0.398928	-0.567002	-0.537456	-1.80607	TRAIN		-0.720558	-0.295112	-0.764328	-0.154531	-0.156747	-0.734665	0.0487479	-1.10749
591	-1.55478	-0.790517	-0.230178	-0.928322	0.317347	-0.398928	-0.567002	1.3266	-1.81749	TRAIN		-0.649567	0.0732671	-0.543549	-0.645389	-0.642319	-0.653413	-0.350695	-0.96808
758	-1.06388	0.893943	-0.230178	-0.928322	0.317347	-0.398928	-0.567002	-0.537456	-2.03688	TRAIN		-0.523898	0.309932	-0.540012	0.602796	0.793745	-0.509582	0.665035	-0.819413
607	-1.43518	-0.790517	-0.230178	-0.928322	0.317347	-0.398928	-0.567002	-0.537456	-2.64787	TRAIN		-0.618951	-0.687268	-0.648431	-0.645389	-0.772803	-0.618372	-0.350695	-0.958649
608	-1.57212	0.893943	-0.230178	-0.928322	0.317347	-0.398928	-0.567002	-0.537456	-2.85688	TRAIN		-0.654006	0.309932	-0.688416	0.602796	0.793745	-0.658494	0.665035	-1.01
759	-2.09227	2.5784	-0.230178	-0.928322	0.317347	-0.398928	-0.567002	-0.537456	-2.86815	TRAIN		-0.787164	1.30713	-0.8403	1.85098	2.36029	-0.810898	1.68076	-1.20506
609	-2.36498	4.26286	-0.230178	-0.928322	0.317347	-0.398928	-0.567002	-0.537456	-3.06125	TRAIN		-0.856979	2.30433	-0.919933	3.09917	3.92684	-0.890803	2.69649	-1.30732
No.	LOGPcons	SAdon	D/Dtr03	nHM	minddssS	F06[O-O]	Cl-089	MaxsssN	Log(1/LC50)	Set		ARKA_1 (1 and others)	ARKA_2 (1 and others)	ARKA_1 (2 and others)	ARKA_2 (2 and others)	ARKA_1 (3 and others)	ARKA_2 (3 and others)	ARKA_1 (4 and others)	ARKA_2 (4 and others)
1	1.64095	-0.790517	4.7264	-0.226197	0.317347	-0.398928	0.524324	-0.537456	3.2546	TEST		1.88932	-0.687268	0.582983	0.638364	-0.772803	1.00766	-0.350695	0.894758
9	2.12767	-0.0797387	-0.230178	-0.226197	0.317347	-0.398928	0.524324	-0.537456	2.56984	TEST		0.4526	-0.266488	0.725108	-0.118702	-0.111779	0.704179	0.0779043	0.730321
6	1.06451	-0.790517	4.32595	-0.928322	0.317347	0.301151	-0.567002	-0.537456	2.52742	TEST		1.48975	-0.687268	0.084278	0.534647	-0.772803	0.535289	-0.350695	0.371871
11	0.756688	-0.790517	1.18624	3.28443	0.317347	-0.398928	1.61565	-0.537456	2.37267	TEST		1.33636	-0.687268	1.14384	-0.278538	-0.772803	1.2731	-0.350695	1.50799
24	1.34416	-0.790517	4.83416	0.475928	0.317347	-0.398928	-0.567002	-0.537456	2.15625	TEST		2.00238	-0.687268	0.406072	0.666275	-0.772803	0.934021	-0.350695	0.857979
20	1.65485	-0.790517	-0.230178	-0.928322	0.317347	-0.398928	-0.567002	-0.537456	2.13796	TEST		0.172097	-0.687268	0.253857	-0.645389	-0.772803	0.287007	-0.350695	0.200111
27	1.84405	-0.790517	-0.230178	-0.226197	0.317347	-0.398928	0.524324	-0.537456	2.087	TEST		0.379992	-0.687268	0.64229	-0.645389	-0.772803	0.621078	-0.350695	0.623962
30	1.66529	0.63104	-0.230178	-0.226197	0.317347	-0.398928	0.524324	-0.537456	2.04235	TEST		0.33423	0.154293	0.590092	0.407984	0.549245	0.568702	0.506504	0.556928
617	0.800593	-0.790517	-0.230178	-0.226197	0.317347	1.00123	0.524324	1.1176	1.91855	TEST		0.180074	-0.0120057	0.46733	-0.645389	-0.656949	0.337747	-0.350695	0.412528
31	-0.0198308	-0.790517	-0.230178	0.475928	0.317347	-0.398928	-0.567002	-0.537456	1.89569	TEST		0.0579316	-0.687268	0.00778659	-0.645389	-0.772803	0.0785805	-0.350695	-0.00802165
47	0.75205	-0.790517	-0.230178	2.5823	0.317347	-0.398928	1.61565	-0.537456	1.65658	TEST		0.731726	-0.687268	1.02101	-0.645389	-0.772803	1.00314	-0.350695	1.19717
55	0.860152	-0.0797387	-0.230178	-0.226197	0.317347	-0.398928	0.524324	-0.537456	1.46328	TEST		0.128114	-0.266488	0.354991	-0.118702	-0.111779	0.332795	0.0779043	0.255
63	0.134869	-0.790517	-0.230178	0.475928	0.317347	-0.398928	-0.567002	-0.537456	1.33094	TEST		0.0975347	-0.687268	0.0529589	-0.645389	-0.772803	0.123908	-0.350695	0.0499907
69	0.733881	-0.790517	-0.230178	-0.226197	0.317347	-0.398928	-0.567002	-0.537456	1.32765	TEST		0.0936059	-0.687268	0.106403	-0.645389	-0.772803	0.158291	-0.350695	0.064685
61	0.586298	-0.790517	-0.230178	1.88018	0.317347	-0.398928	3.7983	-0.537456	1.28408	TEST		0.536383	-0.687268	1.27458	-0.645389	-0.772803	1.08846	-0.350695	1.211
65	-0.915696	2.5784	-0.230178	1.17805	0.317347	-0.398928	-0.567002	3.06017	1.2753	TEST		-0.0141339	2.77497	0.137484	1.85098	2.61213	-0.0427808	1.68076	-0.0656807
630	1.14837	-0.790517	-0.230178	1.17805	0.317347	-0.398928	-0.567002	-0.537456	1.26943	TEST		0.514267	-0.687268	0.470369	-0.645389	-0.772803	0.56199	-0.350695	0.639989
633	1.12111	-0.790517	-0.230178	1.88018	0.317347	-0.398928	0.524324	-0.537456	1.16872	TEST		0.666748	-0.687268	0.795595	-0.645389	-0.772803	0.832639	-0.350695	0.982667
66	-0.656531	-0.790517	-0.230178	1.17805	0.317347	-0.398928	-0.567002	3.06017	1.16028	TEST		0.0522124	0.780565	0.21316	-0.645389	-0.520969	0.0331546	-0.350695	0.0315062
85	1.23529	0.893943	-0.230178	-0.928322	0.317347	3.80155	-0.567002	-0.537456	1.15319	TEST		0.266314	0.309932	0.14815	0.602796	0.793745	0.231285	0.665035	0.48803
95	1.29477	-0.0797387	-0.230178	0.475928	0.317347	-0.398928	1.61565	-0.537456	1.1491	TEST		0.398835	-0.266488	0.815085	-0.118702	-0.111779	0.738773	0.0779043	0.770882
89	0.178931	-0.790517	-0.230178	1.17805	0.317347	1.00123	-0.567002	1.46608	1.1463	TEST		0.333298	0.130175	0.343159	-0.645389	-0.632555	0.300347	-0.350695	0.462933
92	1.04165	-0.790517	-0.230178	-0.928322	0.317347	2.40139	-0.567002	1.62451	1.11064	TEST		0.149533	0.194814	0.248151	-0.645389	-0.621465	0.152144	-0.350695	0.308072
102	0.668191	-0.790517	-0.230178	1.17805	0.317347	-0.398928	-0.567002	-0.537456	0.937921	TEST		0.391341	-0.687268	0.330157	-0.645389	-0.772803	0.421298	-0.350695	0.459922
117	0.0102727	-0.790517	-0.230178	2.5823	0.317347	-0.398928	-0.567002	-0.537456	0.919859	TEST		0.537466	-0.687268	0.38098	-0.645389	-0.772803	0.510782	-0.350695	0.633073
138	0.996808	0.893943	-0.230178	0.475928	0.317347	-0.398928	-0.567002	-0.537456	0.786384	TEST		0.318191	0.309932	0.304645	0.602796	0.793745	0.376456	0.665035	0.373218
129	1.088	-0.0797387	-0.230178	-0.226197	0.317347	-0.398928	0.524324	2.52374	0.755103	TEST		0.186443	0.982482	0.651113	-0.118702	0.102505	0.399555	0.0779043	0.398606
645	0.605868	1.60472	-0.230178	0.475928	0.317347	-0.398928	1.61565	-0.537456	0.717872	TEST		0.222476	0.730713	0.613925	1.12948	1.45477	0.536924	1.09363	0.512543
151	1.08859	0.507741	-0.230178	1.88018	0.317347	-0.398928	1.61565	-0.537456	0.683443	TEST		0.660605	0.0813007	0.997816	0.31662	0.434578	0.960617	0.432155	1.11344
139	0.291312	-0.790517	-0.230178	-0.226197	0.317347	-0.398928	-0.567002	2.00575	0.646577	TEST		-0.019692	0.350361	0.167913	-0.645389	-0.594778	0.0286181	-0.350695	-0.0529576
166	0.229927	-0.790517	-0.230178	1.88018	0.317347	2.40139	-0.567002	1.26378	0.631539	TEST		0.570837	0.0476359	0.469945	-0.645389	-0.646716	0.478819	-0.350695	0.836565
653	1.02501	-0.790517	-0.230178	-0.928322	0.317347	-0.398928	-0.567002	-0.537456	0.631269	TEST		0.0108576	-0.687268	0.0699435	-0.645389	-0.772803	0.102463	-0.350695	-0.0360789
164	0.891674	-0.0797387	-0.230178	-0.928322	0.317347	-0.398928	-0.567002	-0.537456	0.624366	TEST		-0.0232751	-0.266488	0.0310108	-0.118702	-0.111779	0.0633973	0.0779043	-0.086078
156	0.881401	-0.790517	2.28017	2.5823	0.317347	-0.398928	1.61565	-0.537456	0.613551	TEST		1.5556	-0.687268	1.05878	0.00479206	-0.772803	1.26697	-0.350695	1.4214
162	1.25381	-0.790517	-0.230178	2.5823	0.317347	-0.398928	1.61565	-0.537456	0.601254	TEST		0.860176	-0.687268	1.16753	-0.645389	-0.772803	1.15015	-0.350695	1.38533
178	1.1689	-0.0797387	-0.230178	-0.928322	0.317347	-0.398928	-0.567002	-0.537456	0.560052	TEST		0.0476945	-0.266488	0.111961	-0.118702	-0.111779	0.144624	0.0779043	0.0178814
652	0.190921	-0.790517	-0.230178	-0.928322	0.317347	8.00202	-0.567002	-0.537456	0.546282	TEST		0.200577	-0.687268	-0.140005	-0.645389	-0.772803	-0.00750842	-0.350695	0.54164
192	0.666609	-0.790517	-0.230178	-0.226197	0.317347	1.00123	-0.567002	-0.537456	0.530593	TEST		0.143592	-0.687268	0.09236	-0.645389	-0.772803	0.160983	-0.350695	0.187875
163	0.774905	2.5784	-0.230178	0.475928	0.317347	0.301151	1.61565	-0.537456	0.527007	TEST		0.299353	1.30713	0.666084	1.85098	2.36029	0.597654	1.68076	0.65014
181	0.696976	0.893943	-0.230178	0.475928	0.317347	-0.398928	1.61565	-0.537456	0.510108	TEST		0.245799	0.309932	0.640529	0.602796	0.793745	0.563619	0.665035	0.546708
155	-0.0717139	0.507741	-0.230178	0.475928	0.317347	-0.398928	1.61565	-0.537456	0.488897	TEST		0.0490148	0.0813007	0.416071	0.31662	0.434578	0.338393	0.432155	0.25845
185	0.247882	0.507741	-0.230178	-0.928322	0.317347	2.40139	-0.567002	1.35877	0.486707	TEST		-0.0536707	0.854963	-0.0035578	0.31662	0.567314	-0.0804287	0.432155	0.00536188
157	0.36318	0.893943	-0.230178	1.17805	0.317347	-0.398928	2.70698	-0.537456	0.469492	TEST		0.319806	0.309932	0.876245	0.602796	0.793745	0.744451	0.665035	0.774434
663	1.22151	-0.0797387	5.10661	-0.928322	0.317347	-0.398928	-0.567002	-0.537456	0.464915	TEST		1.74225	-0.266488	0.127323	1.26353	-0.111779	0.64035	0.0779043	0.411185
170	0.335098	-0.790517	-0.230178	0.475928	0.317347	-0.398928	-0.567002	-0.537456	0.449087	TEST		0.148793	-0.687268	0.111426	-0.645389	-0.772803	0.182575	-0.350695	0.125077
659	0.116749	-0.790517	-0.230178	-0.226197	0.317347	-0.398928	0.524324	-0.537456	0.437419	TEST		-0.0621974	-0.687268	0.137918	-0.645389	-0.772803	0.114978	-0.350695	-0.0237759
198	0.664857	-0.790517	-0.230178	-0.226197	0.317347	-0.398928	-0.567002	2.25914	0.426465	TEST		0.0759358	0.453741	0.295992	-0.645389	-0.577041	0.138067	-0.350695	0.0919363
168	-0.901081	-0.0797387	-0.230178	-0.226197	0.317347	-0.398928	-0.567002	-0.537456	0.415824	TEST		-0.324944	-0.266488	-0.371006	-0.118702	-0.111779	-0.320753	0.0779043	-0.548426
195	0.0711106	0.63104	2.44596	-0.226197	0.317347	-0.398928	-0.567002	-0.537456	0.380196	TEST		0.766919	0.154293	-0.0871261	1.1011	0.549245	0.204951	0.506504	0.00347534
216	0.779928	-0.790517	-0.230178	-0.226197	0.317347	-0.398928	-0.567002	-0.537456	0.347591	TEST		0.105394	-0.687268	0.119848	-0.645389	-0.772803	0.171783	-0.350695	0.0819524
211	0.88476	-0.790517	-0.230178	0.475928	0.317347	-0.398928	1.61565	-0.537456	0.329994	TEST		0.293872	-0.687268	0.695362	-0.645389	-0.772803	0.61864	-0.350695	0.617127
205	-1.31328	0.507741	-0.230178	0.475928	0.317347	-0.398928	-0.567002	-0.537456	0.326712	TEST		-0.273193	0.0813007	-0.369902	0.31662	0.434578	-0.300401	0.432155	-0.493067
175	0.531293	-0.790517	-0.230178	-0.928322	0.317347	-0.398928	-0.567002	-0.537456	0.313419	TEST		-0.115533	-0.687268	-0.0742204	-0.645389	-0.772803	-0.0421944	-0.350695	-0.221221
230	0.869688	-0.790517	-0.230178	-0.928322	0.317347	-0.398928	-0.567002	3.46702	0.29634	TEST		-0.0289036	0.946556	0.324926	-0.645389	-0.49249	0.0569553	-0.350695	-0.0182378
245	0.901242	-0.790517	-0.230178	0.475928	0.317347	-0.398928	1.61565	1.40574	0.266724	TEST		0.298091	0.105555	0.845914	-0.645389	-0.636779	0.623469	-0.350695	0.660229
231	0.121015	-0.790517	-0.230178	0.475928	0.317347	1.00123	-0.567002	-0.537456	0.261192	TEST		0.161196	-0.687268	0.0545142	-0.645389	-0.772803	0.142251	-0.350695	0.193212
243	0.311331	1.59989	3.24668	1.17805	0.317347	-0.398928	0.524324	2.01189	0.25215	TEST		1.39738	1.76798	0.628871	2.02641	1.62873	0.767162	1.09072	0.760881
251	0.539899	0.893943	-0.230178	-0.226197	0.317347	-0.398928	0.524324	-0.537456	0.191883	TEST		0.0461291	0.309932	0.261477	0.602796	0.793745	0.238961	0.665035	0.134905
261	1.0178	-0.790517	-0.230178	-0.226197	0.317347	-0.398928	0.524324	1.42161	0.190532	TEST		0.168472	0.112031	0.547955	-0.645389	-0.635668	0.378987	-0.350695	0.351341
672	0.28597	-0.790517	-0.230178	-0.226197	0.317347	-0.398928	-0.567002	2.00575	0.187293	TEST		-0.0210595	0.350361	0.166354	-0.645389	-0.594778	0.027053	-0.350695	-0.0549608
670	-0.709428	-0.0797387	-0.230178	-0.928322	0.317347	0.301151	-0.567002	-0.537456	0.175919	TEST		-0.399554	-0.266488	-0.433711	-0.118702	-0.111779	-0.394524	0.0779043	-0.612283
286	0.87787	-0.790517	-0.230178	-0.226197	0.317347	-0.398928	-0.567002	-0.537456	0.11561	TEST		0.130467	-0.687268	0.148448	-0.645389	-0.772803	0.20048	-0.350695	0.118681
263	0.187618	0.63104	-0.230178	-0.226197	0.317347	-0.398928	-0.567002	-0.537456	0.0860447	TEST		-0.0462376	0.154293	-0.0531061	0.407984	0.549245	-0.00176421	0.506504	-0.140164
269	-0.269275	-0.790517	-0.230178	0.475928	0.317347	1.00123	-0.567002	-0.537456	0.0645508	TEST		0.0612815	-0.687268	-0.0594504	-0.645389	-0.772803	0.0278959	-0.350695	0.0468535
202	-0.82055	-0.790517	-0.230178	0.475928	0.317347	-0.398928	-0.567002	-0.537456	0.0634993	TEST		-0.147053	-0.687268	-0.226023	-0.645389	-0.772803	-0.15603	-0.350695	-0.308291
249	-0.654376	-0.790517	-0.230178	-0.226197	0.317347	-0.398928	-0.567002	1.92267	0.0314982	TEST		-0.261788	0.316462	-0.114459	-0.645389	-0.600594	-0.248468	-0.350695	-0.409169
264	-0.8374	1.34182	-0.230178	-0.928322	0.317347	-0.398928	-0.567002	-0.537456	0.023817	TEST		-0.465918	0.575074	-0.473879	0.934671	1.21027	-0.443222	0.935103	-0.734481
246	-0.102849	0.507741	-0.230178	0.475928	0.317347	-0.398928	1.61565	-0.537456	0.0203915	TEST		0.0410441	0.0813007	0.40698	0.31662	0.434578	0.32927	0.432155	0.246774
254	0.360057	-0.0797387	-0.230178	-0.928322	0.317347	-0.398928	-0.567002	-0.537456	-0.00305766	TEST		-0.159369	-0.266488	-0.124222	-0.118702	-0.111779	-0.0923668	0.0779043	-0.285435
270	0.01973	-0.790517	-0.230178	-0.928322	0.317347	-0.398928	-0.567002	-0.537456	-0.0163655	TEST		-0.246493	-0.687268	-0.223597	-0.645389	-0.772803	-0.192082	-0.350695	-0.413057
674	-0.486622	0.893943	-0.230178	-0.928322	0.317347	-0.398928	-0.567002	-0.537456	-0.0196382	TEST		-0.376119	0.309932	-0.371452	0.602796	0.793745	-0.340444	0.665035	-0.602939
302	0.50544	0.893943	-0.230178	-0.226197	0.317347	-0.398928	0.524324	-0.537456	-0.0301163	TEST		0.0373076	0.309932	0.251415	0.602796	0.793745	0.228865	0.665035	0.121983
336	2.13626	2.5784	-0.230178	-0.226197	0.317347	1.70131	-0.567002	-0.537456	-0.047086	TEST		0.553425	1.30713	0.524298	1.85098	2.36029	0.602791	1.68076	0.813201
281	0.104311	0.507741	-0.230178	-0.226197	0.317347	-0.398928	0.524324	-0.537456	-0.0596443	TEST		-0.0653814	0.0813007	0.134286	0.31662	0.434578	0.111334	0.432155	-0.0284401
327	0.987363	0.893943	-0.230178	-0.928322	0.317347	-0.398928	-0.567002	-0.537456	-0.0840933	TEST		0.00122131	0.309932	0.0589521	0.602796	0.793745	0.0914342	0.665035	-0.0501946
278	0.560938	-0.790517	-0.230178	-0.928322	0.317347	-0.398928	-0.567002	-0.537456	-0.0897342	TEST		-0.107944	-0.687268	-0.0655642	-0.645389	-0.772803	-0.0335085	-0.350695	-0.210104
303	-0.254222	0.63104	-0.230178	-0.226197	0.317347	-0.398928	-0.567002	-0.537456	-0.138025	TEST		-0.159349	0.154293	-0.182123	0.407984	0.549245	-0.131223	0.506504	-0.305854
690	-0.277568	-0.790517	-0.230178	-0.928322	0.317347	-0.398928	-0.567002	-0.537456	-0.149453	TEST		-0.322601	-0.687268	-0.310408	-0.645389	-0.772803	-0.279191	-0.350695	-0.524544
334	0.132858	-0.790517	-0.230178	0.475928	0.317347	-0.398928	-0.567002	1.40231	-0.153655	TEST		0.0970199	0.104155	0.197854	-0.645389	-0.637019	0.123318	-0.350695	0.0860921
305	0.144225	-0.790517	-0.230178	-0.226197	0.317347	-0.398928	-0.567002	2.51924	-0.161093	TEST		-0.0573461	0.559862	0.163475	-0.645389	-0.558834	-0.0144782	-0.350695	-0.0983588
325	0.294395	-0.790517	-0.230178	-0.928322	0.317347	-0.398928	-0.567002	2.25212	-0.181805	TEST		-0.176179	0.45088	0.0658237	-0.645389	-0.577532	-0.111606	-0.350695	-0.257056
353	0.791095	-0.790517	-0.230178	-0.928322	0.317347	0.301151	-0.567002	2.24786	-0.197712	TEST		-0.0154197	0.449141	0.213341	-0.645389	-0.577831	0.0451287	-0.350695	0.00333407
343	0.68609	-0.0845739	-0.230178	-0.226197	0.317347	-0.398928	0.524324	1.5639	-0.200815	TEST		0.083554	0.588005	0.461767	-0.122285	0.0308194	0.281795	0.0749887	0.229653
350	0.241018	0.63104	-0.230178	-0.226197	0.317347	-0.398928	-0.567002	-0.537456	-0.203182	TEST		-0.0325671	0.154293	-0.0375132	0.407984	0.549245	0.0138821	0.506504	-0.120139
319	-1.2302	-0.790517	-0.230178	-0.226197	0.317347	1.70131	-0.567002	1.58267	-0.206931	TEST		-0.308389	0.177742	-0.2997	-0.645389	-0.624394	-0.383582	-0.350695	-0.40894
691	0.104311	0.507741	-0.230178	-0.226197	0.317347	-0.398928	0.524324	-0.537456	-0.212689	TEST		-0.0653814	0.0813007	0.134286	0.31662	0.434578	0.111334	0.432155	-0.0284401
694	-0.575894	-0.790517	-0.230178	1.17805	0.317347	-0.398928	-0.567002	-0.537456	-0.219849	TEST		0.0728554	-0.687268	-0.0331162	-0.645389	-0.772803	0.0567812	-0.350695	-0.00660991
698	0.362399	0.893943	-0.230178	1.17805	0.317347	-0.398928	2.70698	-0.537456	-0.253981	TEST		0.319606	0.309932	0.876017	0.602796	0.793745	0.744222	0.665035	0.774141
369	0.950235	0.0234336	-0.230178	0.475928	0.317347	-0.398928	0.524324	-0.537456	-0.261754	TEST		0.308451	-0.20541	0.502763	-0.0422517	-0.0158287	0.500317	0.140117	0.498717
364	-0.844285	0.56767	-0.230178	-0.226197	-3.21118	-0.398928	-0.567002	-0.537456	-0.279946	TEST		-0.857327	0.116778	-1.2789	0.361028	0.490311	-1.27446	-0.932535	-0.527127
348	0.00425643	-0.0797387	-0.230178	-0.928322	0.317347	1.00123	-0.567002	-0.537456	-0.28394	TEST		-0.183247	-0.266488	-0.222515	-0.118702	-0.111779	-0.174214	0.0779043	-0.270443
359	0.736557	-0.790517	-0.230178	-0.928322	0.317347	-0.398928	-0.567002	2.08419	-0.289956	TEST		-0.0629852	0.382363	0.18234	-0.645389	-0.589288	0.0179478	-0.350695	-0.0944358
352	-0.533964	-0.0797387	-0.230178	-0.226197	0.317347	-0.398928	-0.567002	2.3356	-0.301054	TEST		-0.230962	0.905721	-0.0483283	-0.118702	0.0893353	-0.213188	0.0779043	-0.356169
333	-0.20022	-0.790517	-0.230178	-0.226197	0.317347	-0.398928	-0.567002	-0.537456	-0.313429	TEST		-0.145524	-0.687268	-0.166355	-0.645389	-0.772803	-0.115401	-0.350695	-0.285603
331	0.109524	-0.790517	-0.230178	0.475928	0.317347	-0.398928	1.61565	-0.537456	-0.336765	TEST		0.0954116	-0.687268	0.468993	-0.645389	-0.772803	0.391496	-0.350695	0.326414
363	-0.375103	-0.790517	-0.230178	-0.226197	-2.52582	-0.398928	-0.567002	-0.537456	-0.375725	TEST		-0.630985	-0.687268	-0.96233	-0.645389	-0.772803	-0.948512	-1.47943	-0.351184
396	-0.606379	0.56767	-0.230178	-0.226197	-3.72925	1.00123	-0.567002	-0.537456	-0.409475	TEST		-0.809516	0.116778	-1.33956	0.361028	0.490311	-1.32482	-1.13821	-0.289496
360	0.159743	-0.790517	-0.230178	-0.226197	0.317347	-0.398928	0.524324	2.42281	-0.437038	TEST		-0.051191	0.520522	0.372492	-0.645389	-0.565584	0.127575	-0.350695	0.0485918
709	0.347807	0.893943	-0.230178	-0.928322	0.317347	-0.398928	-0.567002	-0.537456	-0.444621	TEST		-0.162505	0.309932	-0.127798	0.602796	0.793745	-0.0959559	0.665035	-0.290028
384	0.564502	-0.790517	3.71348	-0.928322	0.317347	0.301151	-0.567002	-0.537456	-0.452623	TEST		1.16882	-0.687268	-0.0617233	0.376018	-0.772803	0.333666	-0.350695	0.141497
711	0.238718	0.893943	3.26196	-0.226197	0.317347	-0.398928	0.524324	-0.537456	-0.462843	TEST		1.06905	0.309932	0.173533	1.50726	0.793745	0.465008	0.665035	0.266412
406	0.267707	-0.143108	-0.230178	1.17805	-3.10933	1.00123	1.61565	-0.537456	-0.483697	TEST		-0.170745	-0.304002	-0.255538	-0.165659	-0.170713	-0.340963	-1.3207	0.744085
346	-0.28508	0.893943	-0.230178	-0.928322	0.317347	-0.398928	-0.567002	-0.537456	-0.504328	TEST		-0.324524	0.309932	-0.312601	0.602796	0.793745	-0.281392	0.665035	-0.527361
375	-0.0553222	0.63104	-0.230178	-0.226197	0.317347	-0.398928	-0.567002	-0.537456	-0.50761	TEST		-0.10843	0.154293	-0.124045	0.407984	0.549245	-0.0729456	0.506504	-0.231266
361	-1.33679	-0.0797387	-0.230178	-0.928322	0.317347	-0.398928	-0.567002	-0.537456	-0.519374	TEST		-0.593761	-0.266488	-0.6197	-0.118702	-0.111779	-0.589542	0.0779043	-0.921751
382	-0.407175	-0.0797387	-0.230178	-0.226197	0.317347	-0.398928	0.524324	1.71387	-0.530879	TEST		-0.196322	0.652053	0.153781	-0.118702	0.0458138	-0.0385313	0.0779043	-0.177472
387	-0.157523	-0.0797387	-0.230178	-0.226197	0.317347	-0.398928	0.524324	1.75044	-0.56772	TEST		-0.132411	0.666976	0.229423	-0.118702	0.0483742	0.0346165	0.0779043	-0.0831579
388	-0.473201	-0.0845739	-0.230178	-0.226197	0.317347	-0.398928	-0.567002	-0.537456	-0.575968	TEST		-0.215407	-0.26935	-0.246065	-0.122285	-0.116276	-0.195384	0.0749887	-0.387971
401	-1.06301	-0.0797387	-0.230178	-0.226197	0.317347	-0.398928	-0.567002	-0.537456	-0.583775	TEST		-0.366398	-0.266488	-0.418289	-0.118702	-0.111779	-0.368197	0.0779043	-0.609148
349	-1.3831	0.893943	-0.230178	-0.928322	0.317347	-0.398928	-0.567002	-0.537456	-0.596819	TEST		-0.605618	0.309932	-0.633224	0.602796	0.793745	-0.603112	0.665035	-0.939119
392	-0.272707	0.893943	-0.230178	-0.226197	0.317347	-0.398928	0.524324	-0.537456	-0.598314	TEST		-0.161898	0.309932	0.0241963	0.602796	0.793745	0.000867646	0.665035	-0.169822
391	-0.609625	-0.790517	-0.230178	-0.928322	0.317347	-0.398928	-0.567002	-0.537456	-0.622604	TEST		-0.407608	-0.687268	-0.407368	-0.645389	-0.772803	-0.376483	-0.350695	-0.649065
722	0.691768	0.893943	-0.230178	-0.226197	0.317347	-0.398928	0.524324	-0.537456	-0.677673	TEST		0.0850075	0.309932	0.305823	0.602796	0.793745	0.283459	0.665035	0.191856
441	-0.71119	0.56767	-0.230178	-0.226197	-3.0746	3.80155	-0.567002	-0.537456	-0.720835	TEST		-0.600461	0.116778	-1.18745	0.361028	0.490311	-1.13069	-0.878311	-0.0319666
465	-0.946952	0.56767	-0.230178	0.475928	-3.51688	1.00123	-0.567002	-0.537456	-0.773508	TEST		-0.706509	0.116778	-1.2619	0.361028	0.490311	-1.22508	-1.0539	-0.207275
424	-0.400138	-0.0797387	-0.230178	-0.226197	0.317347	-0.398928	0.524324	1.16653	-0.776815	TEST		-0.19452	0.428737	0.114785	-0.118702	0.00749985	-0.0364695	0.0779043	-0.185233
421	-0.135819	1.806	-0.230178	-0.928322	0.317347	-0.398928	-0.567002	-0.537456	-0.778317	TEST		-0.286313	0.84987	-0.269017	1.27863	1.64196	-0.237658	1.215	-0.471388
411	-0.400235	0.893943	-0.230178	-0.928322	0.317347	-0.398928	-0.567002	-0.537456	-0.778325	TEST		-0.354004	0.309932	-0.346227	0.602796	0.793745	-0.315132	0.665035	-0.570544
476	-1.41629	2.89954	-0.230178	0.475928	-3.53669	1.00123	-0.567002	-0.537456	-0.789125	TEST		-0.829729	1.49725	-1.40413	2.08894	2.65895	-1.36804	0.344357	-0.383276
439	0.2697	0.893943	-0.230178	-0.928322	0.317347	1.70131	-0.567002	-0.537456	-0.798099	TEST		-0.0816891	0.309932	-0.142205	0.602796	0.793745	-0.0852374	0.665035	-0.0966932
449	0.560258	0.893943	-0.230178	-0.226197	0.317347	-0.398928	0.524324	-0.537456	-0.805497	TEST		0.0513411	0.309932	0.267422	0.602796	0.793745	0.244927	0.665035	0.14254
417	-2.81747	2.85101	-0.230178	-0.226197	0.317347	3.80155	-0.567002	-0.537456	-0.814664	TEST		-0.613918	1.46852	-0.913791	2.05298	2.61382	-0.815048	1.84515	-0.821823
491	-0.0900068	0.56767	-0.230178	-0.226197	-3.31901	0.301151	-0.567002	-0.537456	-0.833234	TEST		-0.647341	0.116778	-1.0841	0.361028	0.490311	-1.07191	-0.975343	-0.170065
520	2.49057	-0.790517	-0.230178	-0.928322	0.317347	0.301151	-0.567002	-0.537456	-0.836512	TEST		0.419647	-0.687268	0.50069	-0.645389	-0.772803	0.543076	-0.350695	0.587717
492	-0.595571	0.56767	-0.230178	0.475928	-3.1251	1.00123	-0.567002	-0.537456	-0.845439	TEST		-0.555829	0.116778	-1.05665	0.361028	0.490311	-1.01438	-0.898358	-0.0755077
455	0.412861	1.60472	-0.230178	-0.928322	0.317347	-0.398928	-0.567002	-0.537456	-0.859303	TEST		-0.145851	0.730713	-0.108803	1.12948	1.45477	-0.0768952	1.09363	-0.265633
457	-1.01566	0.893943	-0.230178	1.17805	0.317347	2.40139	-0.567002	-0.537456	-0.85938	TEST		0.0946906	0.309932	-0.150326	0.602796	0.793745	-0.0272651	0.665035	0.125311
559	-1.11307	0.56767	-0.230178	0.475928	-3.43044	1.00123	-0.567002	-0.537456	-0.899982	TEST		-0.735636	0.116778	-1.28776	0.361028	0.490311	-1.24998	-1.01958	-0.269568
495	0.805794	0.893943	-0.230178	0.475928	0.317347	1.00123	1.61565	-0.537456	-0.903306	TEST		0.340864	0.309932	0.677904	0.602796	0.793745	0.617905	0.665035	0.735932
499	0.844544	0.893943	-0.230178	0.475928	0.317347	-0.398928	1.61565	-0.537456	-0.904124	TEST		0.283577	0.309932	0.683619	0.602796	0.793745	0.606856	0.665035	0.602046
736	-0.00103624	-0.264062	-0.230178	0.475928	0.317347	0.301151	-0.567002	-0.537456	-0.910983	TEST		0.0963468	-0.375607	0.0160749	-0.255286	-0.2832	0.0952886	-0.0332426	0.0732347
486	-0.249748	1.60472	-0.230178	-0.928322	0.317347	-0.398928	-0.567002	-0.537456	-0.91825	TEST		-0.315479	0.730713	-0.302285	1.12948	1.45477	-0.27104	1.09363	-0.514111
735	0.188634	0.893943	-0.230178	-0.928322	0.317347	-0.398928	-0.567002	-0.537456	-0.927641	TEST		-0.203254	0.309932	-0.174277	0.602796	0.793745	-0.142594	0.665035	-0.349718
551	-0.546558	0.56767	-0.230178	0.475928	-3.07055	0.301151	0.524324	-0.537456	-0.935323	TEST		-0.566248	0.116778	-0.819129	0.361028	0.490311	-0.858714	-0.876703	0.0116276
448	-0.0198638	-0.790517	-0.230178	-0.928322	0.317347	-0.398928	-0.567002	-0.537456	-0.939333	TEST		-0.256629	-0.687268	-0.235158	-0.645389	-0.772803	-0.203683	-0.350695	-0.427905
488	-0.398316	-0.790517	-0.230178	-0.928322	0.317347	1.00123	-0.567002	1.71675	-0.949196	TEST		-0.286305	0.232449	-0.171	-0.645389	-0.615008	-0.292167	-0.350695	-0.378578
517	0.319049	0.63104	-0.230178	-0.226197	0.317347	-0.398928	0.524324	-0.537456	-0.951896	TEST		-0.0104084	0.154293	0.196989	0.407984	0.549245	0.174252	0.506504	0.0520868
743	-0.281554	-0.790517	-0.230178	-0.226197	-1.99379	-0.398928	-0.567002	-0.537456	-0.954158	TEST		-0.524571	-0.687268	-0.795621	-0.645389	-0.772803	-0.774793	-1.26821	-0.316103
519	-0.237046	1.60472	-0.230178	-0.928322	0.317347	-0.398928	-0.567002	-0.537456	-0.954371	TEST		-0.312228	0.730713	-0.298576	1.12948	1.45477	-0.267318	1.09363	-0.509348
723	-3.46256	-0.790517	-0.230178	-0.226197	0.317347	-0.398928	-0.567002	-0.537456	-0.961772	TEST		-0.980683	-0.687268	-1.11896	-0.645389	-0.772803	-1.07127	-0.350695	-1.50898
478	-0.810626	-0.143108	-0.230178	-0.226197	-2.75827	-0.398928	-0.567002	0.799174	-0.992175	TEST		-0.778509	0.241343	-1.05016	-0.165659	-0.0771486	-1.14004	-1.18133	-0.489109
532	-0.935284	0.626204	-0.230178	0.475928	0.317347	-0.398928	-0.567002	-0.537456	-0.992966	TEST		-0.176424	0.151431	-0.259526	0.404402	0.544748	-0.189647	0.503588	-0.351316
456	-1.62939	2.5784	-0.230178	-0.928322	0.317347	-0.398928	-0.567002	-0.537456	-0.994102	TEST		-0.668667	1.30713	-0.705139	1.85098	2.36029	-0.675274	1.68076	-1.03148
573	-1.25965	0.56767	-0.230178	-0.226197	-3.3495	1.00123	-0.567002	-0.537456	-1.00438	TEST		-0.917892	0.116778	-1.43082	0.361028	0.490311	-1.41179	-0.987448	-0.534472
501	-0.313625	0.893943	-0.230178	-0.226197	0.317347	-0.398928	0.524324	-0.537456	-1.01025	TEST		-0.172373	0.309932	0.0122482	0.602796	0.793745	-0.0111213	0.665035	-0.185166
506	-1.45008	2.5784	2.33872	-0.928322	0.317347	-0.398928	-0.567002	-0.537456	-1.01194	TEST		0.186438	1.30713	-0.652781	2.51632	2.36029	-0.391536	1.68076	-0.784412
482	-0.0372195	0.893943	-0.230178	0.475928	0.317347	-0.398928	1.61565	-0.537456	-1.01603	TEST		0.0578454	0.309932	0.426144	0.602796	0.793745	0.3485	0.665035	0.271385
734	-1.33112	-0.0845739	-0.230178	-0.928322	0.317347	-0.398928	-0.567002	1.51445	-1.02095	TEST		-0.592311	0.567829	-0.464153	-0.122285	0.0273579	-0.587883	0.0749887	-0.880641
535	0.0764541	0.893943	-0.230178	0.475928	0.317347	-0.398928	1.61565	-0.537456	-1.02306	TEST		0.0869458	0.309932	0.459336	0.602796	0.793745	0.381806	0.665035	0.314013
487	-0.0707012	0.893943	-0.230178	-0.226197	0.317347	-0.398928	0.524324	-0.537456	-1.02439	TEST		-0.110185	0.309932	0.0831821	0.602796	0.793745	0.0600555	0.665035	-0.0940697
739	-1.68628	0.893943	-0.230178	-0.928322	0.317347	-0.398928	-0.567002	-0.537456	-1.02765	TEST		-0.683233	0.309932	-0.721753	0.602796	0.793745	-0.691945	0.665035	-1.05281
477	-0.798854	2.1922	-0.230178	0.475928	0.317347	-0.398928	0.524324	-0.537456	-1.03473	TEST		-0.139316	1.0785	-0.00797078	1.56481	2.00113	-0.0121661	1.44788	-0.157191
497	-0.101645	2.5784	-0.230178	0.475928	0.317347	-0.398928	1.61565	-0.537456	-1.03474	TEST		0.0413524	1.30713	0.407331	1.85098	2.36029	0.329623	1.68076	0.247225
747	-0.90137	0.893943	-0.230178	-0.226197	-2.63291	2.40139	-0.567002	-0.537456	-1.03842	TEST		-0.647892	0.309932	-1.13286	0.602796	0.793745	-1.08735	-0.506216	-0.251701
518	-1.41428	0.626204	-0.230178	-0.928322	0.317347	-0.398928	-0.567002	-0.537456	-1.04138	TEST		-0.613599	0.151431	-0.642327	0.404402	0.544748	-0.612246	0.503588	-0.95081
569	0.0318183	0.0234336	-0.230178	-0.226197	0.317347	-0.398928	-0.567002	-0.537456	-1.05523	TEST		-0.0861222	-0.20541	-0.0985995	-0.0422517	-0.0158287	-0.0474134	0.140117	-0.198589
731	-0.481876	0.893943	-0.230178	0.475928	0.317347	-0.398928	0.524324	-0.537456	-1.05594	TEST		-0.0581693	0.309932	0.0845867	0.602796	0.793745	0.0807084	0.665035	-0.0383248
514	-1.00868	1.55153	-0.230178	-0.928322	0.317347	-0.398928	-0.567002	-0.537456	-1.07448	TEST		-0.509767	0.699226	-0.523894	1.09007	1.4053	-0.493408	1.06156	-0.798712
467	-1.14369	1.60472	-0.230178	-0.928322	0.317347	-0.398928	-0.567002	-0.537456	-1.07848	TEST		-0.544328	0.730713	-0.563315	1.12948	1.45477	-0.532964	1.09363	-0.849339
737	-1.31987	0.626204	-0.230178	-0.928322	0.317347	-0.398928	-0.567002	-0.537456	-1.09228	TEST		-0.589429	0.151431	-0.614759	0.404402	0.544748	-0.584584	0.503588	-0.915406
466	-0.708698	-0.0797387	-0.230178	-0.928322	0.317347	-0.398928	-0.567002	-0.537456	-1.10715	TEST		-0.43297	-0.266488	-0.436298	-0.118702	-0.111779	-0.405512	0.0779043	-0.686217
570	-0.548996	0.893943	-0.230178	-0.928322	0.317347	1.00123	-0.567002	2.24606	-1.1619	TEST		-0.324879	1.44561	-0.175301	0.602796	0.988591	-0.336317	0.665035	-0.425026
571	-0.616804	0.893943	-0.230178	0.475928	-2.42507	-0.398928	0.524324	-0.537456	-1.16669	TEST		-0.517785	0.309932	-0.673325	0.602796	0.793745	-0.712989	-0.423704	-0.0889231
560	-1.51909	0.898771	-0.230178	-0.226197	0.317347	-0.398928	-0.567002	1.57362	-1.18351	TEST		-0.483155	1.17411	-0.393134	0.606373	0.946011	-0.50183	0.667946	-0.740069
475	-1.72527	-0.790517	-0.230178	-0.928322	0.317347	-0.398928	-0.567002	-0.537456	-1.20438	TEST		-0.693212	-0.687268	-0.733136	-0.645389	-0.772803	-0.703367	-0.350695	-1.06743
463	-2.43025	3.60561	-0.230178	-0.226197	0.317347	-0.398928	-0.567002	-0.537456	-1.2084	TEST		-0.716412	1.91524	-0.817524	2.61214	3.3156	-0.7688	2.30017	-1.12186
557	-1.37228	0.507741	-0.230178	-0.928322	0.317347	-0.398928	-0.567002	-0.537456	-1.21196	TEST		-0.602848	0.0813007	-0.630064	0.31662	0.434578	-0.599942	0.432155	-0.935062
504	-1.85456	0.63104	-0.230178	-0.928322	0.317347	-0.398928	-0.567002	-0.537456	-1.24198	TEST		-0.726311	0.154293	-0.77089	0.407984	0.549245	-0.74125	0.506504	-1.11592
564	-2.01848	3.43849	-0.230178	-0.226197	0.317347	-0.398928	-0.567002	-0.537456	-1.25223	TEST		-0.610999	1.81631	-0.697287	2.48831	3.16018	-0.648151	2.1994	-0.967451
550	-1.75781	0.674859	-0.230178	-0.226197	0.317347	-0.398928	-0.567002	-0.537456	-1.27177	TEST		-0.544267	0.180234	-0.621171	0.440454	0.589997	-0.571774	0.532926	-0.869699
584	-2.82871	2.85101	-0.230178	0.475928	-2.64892	1.70131	-0.567002	0.242345	-1.30137	TEST		-1.0201	1.78668	-1.52268	2.05298	2.66841	-1.52654	0.667539	-0.823912
578	-0.285579	0.507741	-0.230178	0.475928	0.317347	-0.398928	1.61565	-0.537456	-1.309	TEST		-0.0057347	0.0813007	0.353623	0.31662	0.434578	0.27573	0.432155	0.17825
579	-1.96529	1.97312	-0.230178	-0.226197	0.317347	-0.398928	-0.567002	-0.537456	-1.43436	TEST		-0.597382	0.948803	-0.681755	1.40246	1.79738	-0.632566	1.31578	-0.947504
604	-1.16994	2.26715	-0.230178	-0.928322	0.317347	-0.398928	-0.567002	-0.537456	-1.6754	TEST		-0.551048	1.12287	-0.57098	1.62034	2.07083	-0.540655	1.49308	-0.859183
590	-2.53379	3.43849	-0.230178	-0.226197	0.317347	-0.398928	-0.567002	-0.537456	-1.68294	TEST		-0.742919	1.81631	-0.847758	2.48831	3.16018	-0.799138	2.1994	-1.16069
594	-0.757914	-0.790517	-0.230178	-0.928322	0.317347	-0.398928	-0.567002	-0.537456	-1.75317	TEST		-0.44557	-0.687268	-0.450669	-0.645389	-0.772803	-0.419932	-0.350695	-0.704674
605	-2.02371	0.621369	-0.230178	-0.928322	0.317347	-0.398928	-0.567002	-0.537456	-1.86687	TEST		-0.769613	0.148568	-0.820281	0.400819	0.540251	-0.79081	0.500672	-1.17935
600	-1.9728	1.17017	-0.230178	-0.928322	0.317347	-0.398928	-0.567002	-0.537456	-1.94888	TEST		-0.75658	0.473457	-0.805415	0.807478	1.05063	-0.775893	0.831598	-1.16026
